# Supplementary material for: An octopamine receptor confers selective toxicity of amitraz on honeybees and Varroa mites
Source: eLife journal article supplement (doi:10.7554/elife.68268), 2021-07-12
Supplement: supp [file elife-68268-supp-v1.zip]

Archive with 17 entries (17 files):
- elife_poa_e68268_Figure_1_figure_supplement_1.pdf
- elife_poa_e68268_Figure_1_figure_supplement_2.pdf
- elife_poa_e68268_Figure_2_figure_supplement_1.pdf
- elife_poa_e68268_Figure_5_figure_supplement_1.pdf
- elife_poa_e68268_Figure_5_figure_supplement_2.pdf
- elife_poa_e68268_Figure_5_figure_supplement_3.pdf
- elife_poa_e68268_Figure_5_figure_supplement_4.pdf
- elife_poa_e68268_Video_1.mp4
- elife_poa_e68268_Video_2.mp4
- elife_poa_e68268_Video_3.mp4
- elife_poa_e68268_Figure_1_source_data_1.xlsx
- elife_poa_e68268_Figure_2_source_data_1.xlsx
- elife_poa_e68268_Figure_3_source_data_1.xlsx
- elife_poa_e68268_Figure_4_source_data_1.xlsx
- elife_poa_e68268_Figure_5_source_data_1.xlsx
- elife_poa_e68268_Figure_6_source_data_1.xlsx
- elife_poa_e68268_Transparent_Reporting_File.docx
