# Supplementary material for: An octopamine receptor confers selective toxicity of amitraz on honeybees and Varroa mites
Source: eLife journal article supplement (doi:10.7554/elife.68268), 2021-07-12
Supplement: supp [file elife-68268-supp-v1.zip › elife_poa_e68268_Figure_1_source_data_1.xlsx]

## Sheet: Figure 1A
Figure 1A Accession number of OA receptors
Gene name	Species	Class/Order	NCBI accession
AmTAR1	Apis mellifera	Hymenoptera	NP_001011594.1
AmTAR2	Apis mellifera	Hymenoptera	APL96716.1
AmOA1	Apis mellifera	Hymenoptera	NP_001011565.1
AmOctβ1R	Apis mellifera	Hymenoptera	CCO13922.1
AmOctβ2R	Apis mellifera	Hymenoptera	CCO13923.1
AmOctβ3R	Apis mellifera	Hymenoptera	CCO13924.1
AmOctβ4R	Apis mellifera	Hymenoptera	CCO13925.1
AmOctα2R	Apis mellifera	Hymenoptera	XP_001122075.2
DmOct-TyrR	Drosophila melanogaster	Diptera	NP_524419.2
DmTyrR	Drosophila melanogaster	Diptera	NP_650652.1
DmOAMB	Drosophila melanogaster	Diptera	NP_732541.1
DmOctβ1R	Drosophila melanogaster	Diptera	NP_651057.1
DmOctβ2R	Drosophila melanogaster	Diptera	NP_001034049.1
DmOctβ3R	Drosophila melanogaster	Diptera	NP_001034043.1
DmOctα2R	Drosophila melanogaster	Diptera	NP_650754.2
DmFR	Drosophila melanogaster	Diptera	AAF47700.1
VdOAMB	Varroa destructor	Arachnida	XP_022669321.1
VdOctβ2R	Varroa destructor	Arachnida	XP_022664698
VdOct-TyrR	Varroa destructor	Arachnida	XP_022670329
VdOctα2R	Varroa destructor	Arachnida	XP_022657560.1
RmOctβ2R	Rhipicephalus microplus	Arachnida	AFC88978.1
RmOAMB	Rhipicephalus microplus	Arachnida	JN974908
RmOct-TyrR	Rhipicephalus microplus	Arachnida	EF490688

## Sheet: Figure 1B
Figure 1B Accession number of Octβ2Rs
Species	Class	Order	Family	NCBI accession
Varroa destructor	Arachnida	Mesostigmata	Varroidae	XP_022664698
Rhipicephalus microplus	Arachnida	Ixodida	Ixodidae	AFC88978.1
Ixodes scapularis	Arachnida	Ixodida	Ixodidae	XP_040357765.1
Blattella germanica	Insecta	Blattodea	Ectobiidae	PSN51957.1
Bemisia tabaci	Insecta	Hemiptera	Aleyrodidae	XP_018900354.1
Halyomorpha halys	Insecta	Hemiptera	Pentatomidae	XP_014285375.1
Cimex lectularius	Insecta	Hemiptera	Cimicidae	XP_014254146.1
Apis mellifera	Insecta	Hymenoptera	Apidae	CCO13923.1
Apis dorsata	Insecta	Hymenoptera	Apidae	XP_006621346.1
Apis florea	Insecta	Hymenoptera	Apidae	XP_003694478.1
Apis cerana	Insecta	Hymenoptera	Apidae	PBC34729.1
Bombus impatiens	Insecta	Hymenoptera	Apidae	XP_003488300.1
Megachile rotundata	Insecta	Hymenoptera	Megachilidae	XP_012137593.1
Osmia lignaria	Insecta	Hymenoptera	Megachilidae	XP_034187843.1
Eufriesea mexicana	Insecta	Hymenoptera	Apidae	XP_017763346.1
Habropoda laboriosa	Insecta	Hymenoptera	Apidae	XP_017790436.1
Polistes dominula	Insecta	Hymenoptera	Vespidae	XP_015180910.1
Tribolium castaneum	Insecta	Coleoptera	Tenebrionidae	NP_001280501.1
Agrilus planipennis	Insecta	Coleoptera	Buprestidae	XP_018331973.1
Dendroctonus ponderosae	Insecta	Coleoptera	Curculionidae	XP_019771729.1
Bombyx mori	Insecta	Lepidoptera	Bombycidae	NP_001171666.1
Chilo suppressalis	Insecta	Lepidoptera	Crambidae	AEO89318.1
Pieris rapae	Insecta	Lepidoptera	Pieridae	XP_022116353.1
Heliothis virescens	Insecta	Lepidoptera	Noctuidae	PCG67561.1
Plutella xylostella	Insecta	Lepidoptera	Plutellidae	XP_011568733.1
Papilio machaon	Insecta	Lepidoptera	Papilionidae	XP_014367811.1
Papilio xuthus	Insecta	Lepidoptera	Papilionidae	XP_013165403.1
Aedes aegypti	Insecta	Diptera	Culicidae	XP_021693342.1
Anopheles gambiae	Insecta	Diptera	Culicidae	XP_003436280.1
Drosophila melanogaster	Insecta	Diptera	Drosophilidae	NP_001034049.1
Musca domestica	Insecta	Diptera	Muscidae	XP_011294329.1
Zeugodacus cucurbitae	Insecta	Diptera	Tephritidae	XP_011186052.1
Bactrocera dorsalis	Insecta	Diptera	Tephritidae	XP_029408776.1
Bactrocera oleae	Insecta	Diptera	Tephritidae	XP_014091619.1
Ceratitis capitata	Insecta	Diptera	Tephritidae	XP_020713689.1
Stomoxys calcitrans	Insecta	Diptera	Muscidae	XP_013111938.1

## Sheet: Figure 1C 
Figure 1C Dose-response curves of amitraz against the Varroa OA receptors.
Log[amitraz (M)]	VdOAMB
-11	1.82066	7.28266	1.82066
-10	9.10332	3.64133	-1.82066
-9	5.46199	-1.82066	-1.82066
-8	20.0273	7.28266	1.82066	12.7447	3.64133	3.64133	5.46199	-9.10332
-7	23.6686	16.386	20.0273	30.9513	20.0273	21.848	32.772	23.6686
-6	45.5166	38.234	30.9513	60.0819	56.4406	71.0059	60.0819	47.3373
-5	69.1852	56.4406	43.696	96.4952	96.4952	87.3919	91.0332	89.2126
-4	65.5439	61.9026	61.9026	101.957	98.3159	87.3919	87.3919	83.7506
Log[amitraz (M)]	VdOctα2R
-11	0	0	-18.1318	48.3515	18.1318	-42.3076
-10	0	12.0879	42.3076	72.5273	36.2636	30.2197
-9	12.0879	-12.0879	-36.2636	90.6591	6.04394	18.1318
-8	30.2197	-30.2197	0	72.5273	48.3515	54.3954	18.1318	0
-7	60.4394	48.3515	18.1318	60.4394	30.2197	60.4394	24.1758
-6	132.967	72.5273	36.2636	90.6591	60.4394	30.2197	72.5273	72.5273
-5	72.5273	72.5273	72.5273	66.4833	54.3954	66.4833
Log[amitraz (M)]	VdOct-TyrR
-11	20.2799	8.69137	8.69137	-8.69137
-10	20.2799	14.4856	14.4856	-14.4856
-9	-11.5885	2.89712	11.5885	-5.79425
-8	5.79425	2.89712	14.4856	17.3827
-7	14.4856	5.79425	5.79425	14.4856
-6	20.2799	34.7655	23.177	17.3827
-5	40.5597	37.6626	34.7655	28.9712
-4	55.0453	26.0741	23.177	23.177
Log[amitraz (M)]	VdOctβ2R
-11	12.6316	-6.31578	-6.31578	9.47367	0	-3.15789	-15.7895	3.15789	12.6316
-10	15.7895	0	-6.31578	3.15789	15.7895	0	0	9.47367	9.47367
-9	6.31578	6.31578	6.31578	6.31578	0	-9.47367	0	6.31578	12.6316
-8	-3.15789	6.31578	6.31578	12.6316	0	0	-15.7895	6.31578	22.1052
-7	37.8947	41.0526	18.9474	56.8421	53.6842	44.2105	72.6315	59.9999	41.0526
-6	59.9999	56.8421	53.6842	94.7367	69.4736	53.6842	82.1052	78.9473	66.3157
-5	59.9999	56.8421	59.9999	88.421	75.7894	50.5263	104.21	97.8946	72.6315
-4	69.4736	44.2105	69.4736	56.8421	56.8421	78.9473	72.6315	75.7894
Log[amitraz (M)]	VdOctβ2R(I40F)
-11	14.8699	7.43494	5.57621
-10	11.1524	1.85874	-7.43494
-9	16.7286	-5.57621	-5.57621
-8	20.4461	14.8699
-7	42.7509	39.0335	26.0223
-6	65.0558	55.7621	44.6097
-5	87.3606	72.4907	39.0335
-4	83.6431	68.7732	52.0446

## Sheet: Figure 1D
Figure 1D Dose-response curves of DPMF against the Varroa OA receptors.
Log[DPMF (M)]	VdOAMB
-11	12.7447	1.82066	3.64133	1.82066
-10	12.7447	1.82066	-14.5653
-9	38.234	25.4893	16.386	10.924	27.31	25.4893	23.6686	20.0273
-8	65.5439	54.6199	40.0546	30.9513	76.4679	69.1852	45.5166	49.1579
-7	72.8266	67.3646	67.3646	61.9026	94.6746	87.3919	98.3159	85.5712
-6	100.136	80.1092	67.3646	120.164	109.24	105.599	101.957
-5	74.6472	60.0819	50.9786	50.9786	125.626	112.881	87.3919	67.3646
Log[DPMF (M)]	VdOctβ2R
-11	28.421	-22.1052	12.6316	18.9474	12.6316	-9.47367	-28.421	-3.15789	34.7368
-10	0	22.1052	15.7895	-28.421	-18.9473	3.15789	15.7895
-9	44.2105	28.421	-6.31578	47.3684	44.2105	37.8947	41.0526	18.9474	18.9474
-8	78.9473	59.9999	34.7368	75.7894	34.7368	47.3684	56.8421	34.7368	15.7895
-7	91.5789	66.3157	63.1578	104.21	94.7367	91.5789	56.8421	50.5263
-6	113.684	113.684	59.9999	91.5789	78.9473	63.1578	82.1052	47.3684	50.5263
-5	113.684	97.8946	85.2631	129.474	116.842	113.684	101.052	82.1052	78.9473
-4	110.526	94.7367	107.368	101.052	97.8946	75.7894	53.6842
	VdOct-TyrR
Log[DPMF (M)]
-10	35.6482	25.926	-19.4445	-3.24075	3.24074
-9	35.6482	29.1667	25.926	48.6112	-25.926	45.3704	12.963
-8	77.7779	51.8519	38.8889	32.4074	29.1667	45.3704	25.926
-7	106.945	81.0186	71.2964	61.5742	55.0927	64.8149	55.0927
-6	110.185	100.463	106.945	106.945	87.5001	103.704	87.5001
-5	149.074	119.908	100.463	100.463	106.945	106.945	100.463
Log[DPMF (M)]	VdOctα2R
-11	30.2197	24.1758	18.1318	18.1318	18.1318
-10	30.2197	-6.04394	-36.2636	24.1758	12.0879
-9	24.1758	12.0879	-6.04394	36.2636	0
-8	6.04394	54.3954	6.04394	54.3954	18.1318	42.3076	0
-7	66.4833	66.4833	12.0879	60.4394	60.4394	42.3076	36.2636
-6	96.703	48.3515	36.2636	78.5712	78.5712	54.3954	54.3954
-5	84.6151	114.835	42.3076	96.703	102.747	96.703	54.3954
Log[DPMF (M)]	VdOctβ2R(I40F)
-11	13.0112	9.29368	5.57621
-10	13.0112	9.29368	1.85874	0
-9	42.7509	31.5985	40.8922	31.5985
-8	76.2082	27.881	87.3606	78.0669
-7	105.948	83.6431	100.372	98.513
-6	94.7955	96.6543	105.948	94.7955
-5	105.948	96.6543	98.513	98.513

## Sheet: Figure 1-figure supplement 1
Figure 1-figure supplement 1 Dose-response curves of OA against the indicated OA receptors.
Log[OA (M)]	VdOAMB
-11	5.44267	3.62845	-1.81422	16.328	-3.62845
-10	5.44267	-3.62845	5.44267	10.8853	0
-9	10.8853	-7.25689	-5.44267	14.5138	-7.25689	7.25689	9.07112
-8	43.5414	27.2133	25.3991	43.5414	36.2845	54.4267	38.0987	52.6125
-7	47.1698	41.7271	38.0987	65.312	65.312	88.897	76.1974	79.8258
-6	74.3832	72.5689	59.8694	68.9405	126.996	112.482	114.296
-5	92.5254	78.7373	72.5689	83.4543	78.0116	137.881	116.11	137.881
-4	78.0116	72.5689	72.5689	105.225	74.3832	134.252	116.11	125.181
Log[OA (M)]	VdOctβ2R
-11	0	10.1798	6.78656	16.9664	-16.9664	3.39328	6.78656	10.1798	3.39328
-10	6.78656	3.39328	3.39328	16.9664	6.78656	6.78656	10.1798	10.1798	13.5731
-9	16.9664	6.78656	3.39328	10.1798	0	0	10.1798	10.1798	13.5731
-8	57.6858	47.5059	20.3597	57.6858	40.7194	44.1127	71.2589	50.8992	47.5059
-7	64.4723	47.5059	57.6858	88.2253	81.4387	78.0455	84.832	78.0455	78.0455
-6	84.832	81.4387	84.832	91.6186	84.832	84.832	128.945	115.372	101.798
-5	111.978	67.8656	67.8656	128.945	118.765	101.798	145.911	122.158	118.765
-4	98.4052	88.2253	95.0119	111.978	108.585	88.2253	91.6186	71.2589	67.8656
Log[OA (M)]	VdOct-TyrR
-11	0	15.5958	18.7149
-10	-3.11915	18.7149	18.7149
-9	24.9532	24.9532	12.4766	31.1915	6.2383	12.4766	6.2383
-8	43.6681	34.3107	-3.11915	24.9532	21.8341	9.35745	0
-7	59.2639	62.383	56.1447	34.3107	31.1915	31.1915	21.8341
-6	74.8596	84.2171	71.7405	71.7405	62.383	74.8596	53.0256
-5	121.647	102.932	90.4554	96.6937	74.8596	93.5746	90.4554
-4	112.29	99.8128	81.0979	99.8128	93.5746	96.6937	90.4554
Log[OA (M)]	VdOctα2R
-11	6.07533	12.1507	0
-10	30.3767	24.3013	42.5273
-9	12.1507	-6.07533	-24.3013
-8	66.8287	24.3013	-48.6027	30.3767	36.452	-12.1507	54.678	24.3013	6.07533
-7	42.5273	48.6027	-6.07533	30.3767	18.226	72.904	72.904	36.452	54.678
-6	60.7533	72.904	48.6027	60.7533	54.678	48.6027	78.9793	66.8287	97.2053	24.3013	18.226
-5	121.507	115.431	109.356	91.13	66.8287	115.431	97.2053	85.0547	109.356	97.2053	97.2053
-4	121.507	78.9793	133.657	78.9793	54.678	97.2053	85.0547	78.9793	127.582	78.9793	66.8287
Log[OA (M)]	VdOctβ2R(I40F)
-11	11.5207	5.76037	15.361
-10	9.60061	7.68049	3.84025
-9	15.361	3.84025	5.76037
-8	48.0031	44.1628	36.4823	55.6836	49.9232
-7	78.725	71.0446	53.7634	92.1659	69.1244
-6	101.766	86.4055	84.4854	94.086	82.5653
-5	99.8464	96.0061	76.8049	107.527	99.8464
-4	103.687	92.1659	92.1659	115.207	113.287

## Sheet: Figure 1-figure supplement 2
Figure 1-figure supplement 2 Dose-response curves of compound against the indicated OA receptors.
Log[OA (M)]	OA
-11	0.05	0.02	0
-10	0.03	0.02	0
-9	0.03	0.03	0.07
-8	0.08	0.05	0.02
-7	0.07	0.01	0
-6	0.02	-0.01	0.01
-5	0.09	0.04	0.02
-4	0.05	0.03	-0.03
Log[amitraz (M)]	amitraz
-11	0.06	0.03	0.01
-10	0.05	0.02	0
-9	0.04	0.02	0
-8	0.03	0.01	-0.01
-7	0.05	0.01	0
-6	0.04	0.02	-0.01
-5	0.04	0.08	-0.03
