# Supplementary material for: An octopamine receptor confers selective toxicity of amitraz on honeybees and Varroa mites
Source: eLife journal article supplement (doi:10.7554/elife.68268), 2021-07-12
Supplement: supp [file elife-68268-supp-v1.zip › elife_poa_e68268_Figure_2_source_data_1.xlsx]

## Sheet: Figure 2C
Figure 2C Effects of 1 mM amitraz on the number of lunges in different OA receptor mutants and control flies.
	1 % DMSO
Canton s	1	0	0	7	2	3	0	1	1	1	3	2	2	1	4	2	1	1	2	3	1	2	6	0	3	3	4	2	1	1
oambdel	2	1	1	0	2	3	4	3	3	2	4	3	4	1	2	3	3	0	4	4	1	2	1	1
octβ1Rf02819	3	2	2	3	4	1	2	2	2	2	1	3	3	3	3	2	2	1	2	3	3	3	3	1
octβ3RMB04794	2	1	4	2	1	3	1	2	2	0	3	0	1	3	4
octα2Rdel	2	4	1	2	2	3	2	3	2	1	2
oct-tyrRGal4	2	2	6	1	5	5	1	6	3	1	1	1	4	1	2	2	1	1	2	3	2
octβ2Rf05679/+	2	1	1	2	1	2	1	0	1	1	5	3	1	0	1	1	1	2	1
octβ2Rf05679	3	1	5	5	3	3	9	1	1	2	5	2	3	2	4	4	1	3	1	3	5	5	1	3	5	1	4
octβ2Rf05679/Df	1	3	1	2	1	1	2	0	1	3	2	1	2	1	1	2	2	3	1	1	2	3	2	1
	1 mM amitraz
Canton s	10	15	8	3	21	19	22	8	12	12	14	13	10	14	10	10	6	4	13	12	7	15	12	5	17	19	8	7	11	10	13	16	12	10
oambdel	10	8	16	16	23	4	8	16	14	12	9	12	10	12	13	11	4	13	6	5	12	7
octβ1Rf02819	3	12	13	9	11	7	8	12	13	13	8	5	14	8	8	10	13	8	9	10	7	8	15	11
octβ3RMB04794	4	8	11	14	11	4	8	7	7	9	8	4	7	8	11
octα2Rdel	8	9	10	5	6	13	6	7	14	14	15	5
oct-tyrRGal4	9	9	16	11	8	2	10	12	4	7	10	13	6	12	4	18	2	3	8	3	8	13	10	5
octβ2Rf05679/+	9	5	7	12	6	4	6	6	13	11	10	8	11	8	7	2	3	12	13
octβ2Rf05679	9	1	5	4	4	2	4	7	3	6	7	3	5	3	4	5	2	5	2	2	2	3	2	1	4	2	3	2	2	2	1
octβ2Rf05679/Df	2	3	1	4	0	2	1	1	2	2	1	0	1	2	1	3	1	0	3	4	2	2	1	1

## Sheet: Figure 2D
Figure 2D Effects of 1 mM amitraz on the latency to initiate fighting in different OA receptor mutants and control flies.
	1 % DMSO
Canton s	420	900	900	126	201	124	900	508	765	793	384	443	450	552	245	729	183	656	114	315	867	848	221	900	385	349	564	280	224	245
oambdel	581	235	590	900	500	738	493	469	612	348	270	361	328	614	492	270	534	900	245	367	832	335	361	685
octβ1Rf02819	232	173	311	195	169	414	851	297	465	612	744	538	665	488	260	353	196	328	590	85	277	408	418	882
octβ3RMB04794	410	590	375	340	736	431	662	435	489	478	599	344	604
octα2Rdel	538	265	602	324	371	420	522	441	302	685	500
oct-tyrRGal4	348	307	330	292	167	402	390	268	804	806	312	144	352	79	62	555	667	599	312	41	222
octβ2Rf05679/+	416	708	413	622	586	480	468	900	137	412	133	96	170	900	603	421	342	600	571
octβ2Rf05679	217	752	229	205	341	341	794	459	625	142	187	539	338	170	86	800	136	104	636	466	151	658	473
octβ2Rf05679/Df	662	457	506	515	688	461	189	451	630	512	440	844	546	437	674	313	194	188	580	280	664	207	104
	1 mM amitraz
Canton s	80	51	264	58	323	235	18	111	14	105	58	150	146	135	184	259	230	171	43	22	106	80	26	86	4	23	40	94	13	35	48	134	44
oambdel	198	189	182	130	192	318	443	181	110	127	247	264	83	294	104	195	431	133	359	52	169	595
octβ1Rf02819	452	33	68	95	70	148	122	74	70	108	185	136	65	89	236	54	130	77	222	333	85	150	130	230
octβ3RMB04794	391	96	59	58	24	269	58	126	113	138	133	138	88	126	111
octα2Rdel	125	85	110	76	147	99	153	285	108	103	118	203
oct-tyrRGal4	69	66	80	108	87	150	161	15	302	60	192	42	355	60	143	47	103	110	119	138	70	17	81	328
octβ2Rf05679/+	22	242	121	159	120	160	49	176	36	56	151	41	113	91	17	273	217	27	62
octβ2Rf05679	210	594	354	870	178	599	165	121	175	376	121	448	154	464	452	105	220	152	385	292	559	431	145	855	618	171
octβ2Rf05679/Df	375	98	646	367	900	529	555	424	471	536	602	506	536	122	504	110	149	701	38	66	310	155

## Sheet: Figure 2—figure supplement 1
Figure 2—figure supplement 1. Adult survival
days	1% DMSO				1 mM amitraz				2.5 mM amitraz				5 mM amitraz
1	90	100	100		100	100	100		80	100	90		100	100	100
2	90	100	100		90	100	100		80	100	90		100	100	75
3	90	100	100		90	100	100		80	100	80		100	100	75
4	90	100	100		90	100	100		80	100	80		100	100	75
5	90	100	100		80	100	90		70	70	60		90	70	75
6	90	100	100		70	100	70		70	50	50		90	50	50
7	90	100	100		60	100	60		50	40	40		70	50	37.5
8	90	100	100		60	100	50		50	40	30		60	50	37.5
