# Supplementary material for: An octopamine receptor confers selective toxicity of amitraz on honeybees and Varroa mites
Source: eLife journal article supplement (doi:10.7554/elife.68268), 2021-07-12
Supplement: supp [file elife-68268-supp-v1.zip › elife_poa_e68268_Figure_3_source_data_1.xlsx]

## Sheet: Figure 3A
Figure 3A W+; W1118
Crossings per 30 min
																																	100uM Amitraz
32	0	47	39	81	45	28	2	61	77	92	42	145	8	87	26	58	53	0	18	82	13	40	65	0	35	50	59	16	86				26	38	13	67	21	25	0	44	37	36	73	64	44	47	49	39	66
14	0	51	42	58	25	38	11	44	35	47	18	110	23	46	71	38	39	0	37	33	0	32	27	0	12	34	27	2	14				16	0	17	18	7	10	0	7	27	4	14	36	27	5	4	4	61
9	0	23	29	41	83	5	0	39	29	15	32	56	18	19	29	31	6	0	14	3	0	16	24	0	0	71	69	12	6				0	1	0	0	1	0	0	0	0	11	0	18	4	0	0	0	3
24	0	0	23	2	27	9	4	17	13	4	0	17	11	4	11	13	10	0	4	5	0	15	0	0	19	1	37	3	2				0	7	0	5	3	0	0	4	18	32	2	0	44	0	0	4	6
1	0	0	18	0	0	0	3	18	0	6	0	13	17	0	26	5	9	0	21	19	0	8	14	0	16	0	24	2	15				2	6	0	1	4	0	0	1	0	17	18	0	12	0	0	47	0
0	0	0	40	0	2	0	1	0	0	0	0	0	15	0	7	7	10	0	0	15	0	44	11	0	0	38	11	2	20				5	0	0	0	0	15	0	0	3	5	11	0	24	0	0	28	0
4	0	63	40	0	89	0	0	0	0	2	0	0	24	0	0	0	43	0	9	0	0	5	0	0	5	0	0	7	28				25	0	27	0	2	24	0	0	8	26	15	0	31	4	0	37	2
0	0	8	18	0	2	0	0	0	0	0	0	42	20	40	0	0	4	0	0	16	0	5	9	0	0	32	0	13	11				2	0	50	19	1	21	0	26	10	11	12	0	2	0	0	52	19
0	0	0	29	0	0	10	0	0	0	0	0	18	14	4	0	0	1	0	0	21	0	26	0	0	0	24	11	5	0				0	0	77	4	7	9	0	0	22	38	23	0	19	0	0	38	5
0	0	15	30	0	3	14	0	2	2	16	0	0	21	0	11	2	13	0	0	16	0	10	10	0	0	1	16	9	0				0	0	23	0	35	0	0	0	4	26	22	0	71	0	0	50	10
0	0	28	22	0	9	25	0	7	0	5	0	0	17	3	1	0	5	0	3	41	6	13	61	0	0	0	0	6	45				0	1	4	34	13	0	0	0	0	18	41	0	45	0	0	27	4
0	0	13	27	2	0	0	0	0	0	4	0	0	29	0	46	0	20	0	0	17	0	3	0	0	5	0	32	5	3				0	0	0	16	28	0	0	0	0	16	30	4	40	0	0	52	8
0	0	11	23	2	5	11	0	2	0	5	0	0	0	0	53	4	55	0	0	14	0	5	0	0	0	4	52	17	88				0	0	2	31	34	25	0	7	22	18	19	3	6	38	0	35	2
19	0	8	26	0	1	14	2	15	0	0	0	0	4	46	41	0	20	0	32	6	2	2	0	0	4	1	1	36	19				0	0	6	0	10	38	0	2	10	24	43	0	12	24	2	37	0
19	0	0	2	0	9	0	0	6	0	0	0	0	26	11	0	0	0	0	3	10	0	40	7	0	0	0	42	9	0				0	0	0	2	4	13	0	0	0	16	60	0	10	1	35	44	0
0	0	167	36	0	16	5	0	0	14	0	0	0	5	13	23	2	0	0	0	14	0	0	19	0	0	0	8	12	0				0	0	8	0	1	0	0	0	0	38	5	0	9	3	1	41	7
57	0	0	22	20	9	10	2	0	10	0	0	0	2	4	12	0	0	0	0	1	0	7	0	0	0	0	30	0	45				0	2	10	0	24	0	0	0	19	20	49	0	9	6	22	19	10
0	0	33	20	0	0	6	2	0	0	0	0	0	0	0	0	0	1	0	0	2	8	3	21	0	0	0	13	36	0				0	11	25	0	1	0	0	0	5	19	31	0	35	20	18	30	18
0	0	227	30	0	5	4	4	3	0	0	0	0	2	0	0	0	14	0	0	11	0	0	20	0	0	0	5	16	0				0	0	75	0	23	0	0	0	34	28	38	0	74	0	10	53	0
0	0	0	29	0	0	0	0	3	0	0	0	0	5	58	0	0	0	0	0	12	0	0	13	0	0	0	0	5	0				0	0	8	0	0	0	0	0	2	3	55	0	80	0	0	26	12
0	0	0	19	0	0	0	2	0	0	0	0	0	7	0	0	0	0	0	0	9	0	0	8	0	0	17	0	0	0				0	0	12	0	0	0	0	19	0	32	43	0	107	0	0	50	6
11	0	0	29	0	0	8	6	11	45	0	0	0	3	0	0	0	0	0	0	3	7	20	0	0	0	23	0	1	0				0	0	36	0	8	0	0	0	15	12	43	0	94	0	0	56	17
0	0	0	30	0	5	8	4	1	24	0	0	0	0	0	0	17	0	0	0	18	0	10	30	0	0	2	1	8	0				0	0	35	13	10	0	0	0	0	8	62	0	121	0	0	47	4
0	0	0	29	6	0	7	0	0	0	2	0	0	1	0	25	0	3	0	0	25	0	1	0	0	0	10	6	2	40				0	0	19	7	13	0	0	0	0	2	77	0	166	0	0	23	13
79	0	122	0	56	54	60	36	59	50	53	54	91	6	64	57	71	46	0	52	60	3	51	33	0	45	32	82	44	51				30	31	31	41	16	0	0	37	40	43	34	49	302	55	47	69	8
68	0	67	12	18	37	45	12	68	41	37	36	90	0	58	47	31	20	0	32	41	0	56	37	0	41	29	39	26	60				14	13	23	13	34	0	0	4	25	48	29	38	339	14	1	81	11
70	0	50	10	18	24	37	20	31	36	42	36	46	0	55	36	40	19	0	25	42	0	37	27	0	31	26	41	21	9				0	1	35	0	19	0	0	1	9	43	27	23	277	0	8	96	14
45	0	12	17	31	18	27	0	17	17	28	39	42	0	47	31	7	6	0	18	36	2	33	30	0	28	24	21	19	24				0	9	8	0	30	0	0	29	18	27	37	13	83	0	31	103	19
32	0	17	10	9	15	9	6	21	17	9	10	28	0	26	19	2	9	0	17	25	2	35	19	0	31	14	6	18	11				20	9	24	27	34	0	0	32	6	117	42	9	96	39	27	107	53
28	0	29	2	6	7	8	25	7	0	4	8	42	0	21	6	0	3	0	12	11	9	16	31	0	7	10	7	26	9				11	21	38	38	26	0	0	32	16	28	25	11	45	19	40	87	8
3	0	33	0	3	5	8	17	16	0	0	13	17	0	24	18	0	5	0	2	5	3	19	13	0	0	8	20	14	3				33	29	30	1	27	0	0	41	14	43	20	8	86	14	37	90	17
8	0	0	0	6	2	0	16	20	0	3	5	0	0	20	4	0	0	0	3	4	10	8	14	0	4	4	5	0	22				46	39	20	16	29	0	0	23	8	43	35	18	78	23	28	59	35
22	0	23	0	0	5	1	23	0	0	0	4	20	0	6	2	0	11	0	1	11	4	10	20	0	0	8	0	26	12				12	22	12	24	37	0	0	51	3	42	30	9	80	35	38	46	46
61	0	0	0	22	17	0	22	0	0	0	1	4	0	2	0	0	0	0	0	5	0	7	27	0	0	0	0	0	12				32	35	19	0	79	0	0	30	16	29	48	16	43	3	33	58	45
0	5	0	4	3	0	14	10	4	1	5	12	0	23	8	7	0	0	0	0	4	10	8	14	12	9	3	17	13	17				59	26	32	26	50	0	32	44	35	42	79	20	74	66	47	20	9
14	0	5	0	4	3	0	14	10	4	1	5	12	0	23	8	7	0	0	17	6	1	19	8	8	0	6	0	19	3				59	33	15	4	33	0	8	29	19	4	21	8	117	14	12	38	26
22	0	0	0	0	0	2	14	0	25	0	0	8	0	14	2	0	4	0	0	0	3	20	2	20	0	0	0	19	0				0	41	17	14	25	0	23	40	5	0	32	0	76	0	14	61	29
11	0	0	0	0	2	2	12	1	14	0	0	12	0	25	0	0	0	0	1	0	5	5	10	0	0	5	0	6	0				0	32	7	16	44	0	2	24	7	0	45	0	72	0	2	45	25
0	3	0	0	0	0	0	16	31	29	0	0	0	0	2	0	0	4	0	0	0	1	1	0	0	0	0	0	0	1				42	23	5	14	36	0	28	1	3	0	37	0	42	17	34	25	9
2	0	0	0	0	0	0	16	8	6	0	0	6	0	2	1	0	19	0	0	0	0	3	7	8	0	12	0	7	0				29	18	6	64	19	0	12	1	9	0	29	0	31	2	19	31	8
28	0	25	0	11	0	0	9	21	12	0	0	0	0	1	0	1	9	0	1	0	0	1	4	5	0	25	0	0	0				0	10	2	59	32	0	16	6	3	9	24	0	49	0	17	54	31
2	0	13	0	9	15	0	12	0	33	0	1	1	0	1	0	4	5	0	0	0	0	1	8	1	0	13	0	8	13				5	24	10	14	24	0	16	13	7	18	13	18	9	4	0	46	18
7	78	11	0	6	0	0	8	21	4	0	4	1	0	1	0	27	13	0	0	0	0	0	11	1	0	0	0	5	7				64	5	22	15	52	0	6	15	12	16	25	9	18	8	0	45	27
19	21	6	0	20	0	0	19	0	6	0	0	0	0	0	0	1	21	0	6	1	0	0	3	3	0	2	0	0	8				25	30	9	22	31	0	14	12	11	32	20	17	11	13	3	36	4
12	6	0	20	0	0	19	0	6	0	0	0	0	0	0	1	21	0	6	5	1	0	0	3	3	0	2	0	0	8				33	12	28	29	17	1	34	26	25	38	22	16	48	36	26	49	12
0	0	11	0	0	0	0	9	0	0	4	0	2	0	5	7	0	5	0	0	0	0	21	3	0	18	0	0	1	0				0	3	5	5	0	0	21	0	14	36	20	0	42	21	10	34	26
2	0	1	0	1	4	3	16	0	0	0	0	14	0	4	8	0	3	0	0	0	0	15	12	7	15	2	9	0	7				0	16	8	13	4	0	0	22	11	31	30	0	34	9	12	38	6
13	0	7	0	0	1	6	13	2	0	18	11	16	0	3	18	0	11	0	2	0	0	14	21	10	7	6	63	2	10				0	17	19	15	6	0	2	1	13	44	30	3	41	36	20	51	31
14	37	64	0	53	58	32	4	77	44	41	24	41	0	43	25	78	83	0	57	24	0	57	48	13	38	22	28	6	47				19	73	69	53	89	0	44	56	99	103	116	69	90	61	98	76	76
35	23	33	0	36	49	17	16	40	18	14	2	16	0	5	68	43	39	0	12	12	0	60	27	1	7	7	45	1	28				0	30	39	44	62	0	42	34	78	61	107	27	52	17	17	84	62
10	23	37	0	17	22	16	6	25	2	2	0	24	0	16	4	33	48	0	29	22	0	38	17	31	9	0	21	1	22				9	15	52	21	49	0	38	0	71	98	93	2	42	31	0	82	45
0	7	15	0	12	8	29	17	0	23	16	0	2	0	1	2	21	6	0	25	51	0	11	0	18	2	0	11	0	2				33	28	52	23	63	0	45	8	84	62	88	0	20	15	0	92	44
0	2	0	0	10	33	2	16	0	2	3	0	5	0	1	102	25	51	0	35	17	0	35	16	9	16	12	2	3	4				0	30	48	33	59	0	77	13	66	73	95	0	13	21	7	67	21
0	0	24	0	3	0	13	8	1	38	0	0	8	0	2	0	6	25	0	20	18	0	4	0	10	0	3	0	5	0				0	41	32	32	48	0	72	8	61	36	92	31	20	49	0	82	45
0	0	0	0	10	0	5	27	0	35	7	0	5	0	15	7	3	51	0	6	12	0	12	0	0	0	5	3	11	14				0	38	26	31	58	0	28	7	60	40	107	10	16	48	0	81	13
3	0	17	0	3	0	13	17	1	6	3	0	1	0	17	0	0	2	0	12	21	0	4	20	0	0	1	13	6	3				19	34	58	40	50	0	55	23	62	47	87	19	11	44	0	69	39
0	9	3	0	16	0	7	11	1	0	0	0	1	0	5	0	27	27	0	12	15	0	9	32	0	0	1	5	0	34				5	43	68	41	47	0	43	10	66	35	82	4	18	49	0	59	16
5	0	13	0	6	0	0	0	24	2	0	0	0	0	19	2	54	24	0	18	2	0	0	5	0	8	0	0	12	12				10	33	43	32	45	0	107	10	71	33	82	8	9	41	0	75	26
0	5	26	0	11	12	2	0	2	0	4	0	0	0	11	3	14	50	0	3	8	0	0	20	19	26	0	0	0	47				15	28	24	32	38	0	47	10	43	37	72	23	6	36	0	62	24
24	0	20	0	0	33	0	1	3	0	0	0	0	0	2	39	4	44	0	50	18	0	0	14	4	0	0	7	6	19				0	11	36	24	51	0	43	11	73	25	87	0	1	43	0	94	64
53	1	28	0	0	0	2	19	13	29	6	5	0	0	0	4	20	3	0	7	9	0	6	21	4	0	9	0	6	14				0	10	29	23	44	0	27	14	89	19	85	15	10	54	0	67	54
0	13	34	0	0	0	25	15	0	11	0	0	17	0	10	0	1	16	0	16	5	0	49	13	0	0	0	0	15	0				0	17	36	10	36	0	67	20	35	29	92	12	0	35	0	70	33
41	0	25	0	1	24	0	35	14	1	7	0	8	0	5	10	7	0	0	3	0	0	2	15	0	5	0	0	11	8				0	5	19	14	48	0	68	11	40	43	66	8	0	46	0	79	33
15	0	26	0	0	6	15	10	33	7	3	0	3	0	7	0	0	12	0	1	5	0	0	0	7	0	0	4	19	3				0	11	45	17	56	0	72	20	50	42	62	12	2	24	18	70	45
0	2	0	0	2	15	0	32	26	0	0	0	0	0	7	4	4	40	0	24	0	0	14	12	0	0	0	0	0	13				0	29	3	22	44	0	33	21	45	18	83	37	1	24	24	72	36
20	0	0	0	14	16	5	0	0	0	0	62	8	0	32	2	0	5	0	14	0	0	2	8	2	0	0	0	18	0				2	26	35	36	34	0	38	42	48	32	69	23	0	22	0	64	39
0	0	0	0	0	20	20	0	0	0	0	0	21	0	19	0	0	1	0	13	5	0	5	21	0	0	0	0	12	0				0	31	26	42	38	0	41	20	57	37	74	31	0	53	31	61	31
4	0	16	0	7	0	24	0	0	0	4	0	53	0	21	0	2	18	0	27	6	0	5	1	15	0	0	0	0	14				0	5	64	13	43	0	53	24	75	31	80	31	10	18	14	59	47
73	0	36	0	4	13	0	0	26	7	0	0	18	0	41	0	0	0	0	1	21	0	25	0	6	0	3	13	0	0				0	0	29	5	30	0	22	14	39	23	47	18	0	14	18	39	31
10	0	0	0	40	12	52	0	11	20	0	0	11	0	19	0	1	0	0	0	14	0	0	35	3	0	16	0	0	6				0	10	36	18	21	0	30	14	38	7	16	27	2	11	21	28	40
8	0	0	0	2	22	53	0	12	24	10	0	0	0	11	72	29	0	0	0	7	0	11	7	34	0	0	0	9	0				5	20	34	16	33	0	51	32	22	26	44	31	6	27	26	53	43
0	0	0	0	16	49	15	0	8	0	1	0	0	0	24	4	27	39	0	49	26	0	12	11	6	5	4	2	8	12				0	32	29	30	42	0	27	32	51	30	69	34	14	21	42	27	49
46	43	37	0	51	53	51	0	44	38	84	40	52	0	45	53	46	46	0	47	36	0	39	42	32	51	28	67	45	32				26	32	46	41	29	0	20	39	52	15	28	14	43	58	30	50	20
36	32	22	0	27	52	48	0	34	24	40	20	35	0	47	40	36	17	0	27	40	0	34	53	43	26	26	42	44	20				14	26	25	23	26	0	62	29	33	4	23	21	40	47	8	44	25
34	18	21	0	21	35	24	0	23	16	21	21	26	0	45	33	26	25	0	12	32	0	49	41	25	22	22	58	50	15				35	10	18	33	4	0	29	20	28	12	15	15	40	23	11	34	14
22	10	19	0	10	37	14	0	6	18	19	17	19	0	37	20	10	7	0	17	25	0	32	34	23	16	19	33	45	19				15	8	19	18	29	0	13	21	21	27	34	14	8	18	17	18	9
22	11	10	0	8	10	7	0	4	8	7	13	20	0	35	12	5	9	0	4	30	0	24	29	16	9	22	30	43	7				19	39	20	20	9	0	34	8	9	21	10	7	10	21	20	19	22
13	13	11	0	2	14	4	0	0	6	6	6	27	0	24	7	0	5	0	5	13	0	23	19	22	2	14	15	26	8				38	9	13	36	6	0	16	23	20	31	40	18	25	23	16	15	8
9	20	9	0	3	9	2	0	0	2	0	9	13	0	17	0	0	9	0	3	2	0	16	30	23	0	14	7	41	3				37	26	3	73	22	0	8	12	30	19	30	10	64	19	22	27	8
30	12	22	0	3	31	1	0	2	9	0	10	7	0	24	0	0	1	0	3	0	0	9	23	19	0	6	5	23	0				9	11	4	33	15	0	15	2	11	29	34	5	12	31	13	21	18
13	10	4	0	1	1	10	0	0	0	0	3	10	0	8	0	0	0	0	0	0	0	3	17	15	0	3	2	5	0				40	30	10	17	16	0	40	13	10	8	26	5	31	23	21	23	7
16	15	2	0	4	9	0	0	0	0	0	3	0	0	6	0	0	1	0	3	0	0	0	0	4	0	0	0	10	1				22	18	10	13	15	0	17	44	19	51	30	2	25	16	22	19	8
8	1	0	0	0	0	6	0	10	0	0	9	3	0	1	0	0	0	0	0	0	0	0	7	9	0	3	13	17	1				71	6	21	32	22	0	17	5	9	20	18	38	61	9	19	52	9
9	17	1	0	0	0	0	0	2	0	0	0	1	0	3	0	0	0	0	0	0	0	0	12	11	0	0	0	11	3				49	30	17	33	12	0	0	32	6	8	11	2	18	29	21	40	3
13	9	1	0	3	0	1	0	0	0	0	0	0	0	1	0	0	0	0	0	0	0	0	0	6	0	0	0	0	5				46	20	16	49	11	0	3	21	7	35	20	0	16	5	32	32	11
0	0	2	0	0	0	0	0	29	0	0	0	0	0	0	0	0	0	0	0	0	0	0	32	7	0	0	0	0	0				58	12	12	46	18	0	5	25	2	33	14	0	42	29	24	29	10
18	0	0	0	0	19	0	0	0	0	0	0	0	0	0	0	0	0	0	0	0	0	0	28	2	0	0	0	0	1				27	8	14	23	2	0	4	36	0	17	51	0	51	17	10	31	18
3	11	0	0	0	8	0	0	0	0	0	0	0	0	0	0	0	0	0	15	0	0	26	13	1	0	0	0	2	0				45	18	33	9	6	0	2	22	43	11	8	0	64	2	27	34	7
6	0	0	0	0	3	0	0	0	0	0	0	0	0	0	0	0	19	0	0	0	0	0	9	0	9	0	0	0	0				23	5	15	72	6	0	115	26	4	27	7	0	23	4	21	28	13
9	5	0	0	0	0	0	0	9	0	0	0	0	0	0	51	0	0	0	0	0	0	0	4	0	4	0	0	0	0				30	6	2	29	4	0	6	17	3	21	5	1	20	15	19	17	7
19	0	0	0	3	29	8	0	5	0	0	0	1	0	1	2	0	11	0	4	0	0	0	8	0	0	0	0	1	0				12	13	1	9	3	0	12	7	16	14	10	18	17	3	1	19	13
43	4	0	0	6	16	0	0	0	0	0	0	0	0	0	2	0	0	0	0	0	0	0	8	0	7	0	0	16	0				38	2	0	20	7	0	2	11	3	17	30	18	8	7	3	35	7
4	0	0	0	2	8	0	0	1	0	0	0	0	0	2	5	0	17	0	3	0	0	0	17	0	0	2	6	18	8				19	3	0	2	3	0	2	13	8	2	3	37	0	3	0	7	21
0	4	5	0	1	3	0	0	5	0	0	0	0	0	17	9	0	0	0	0	0	0	2	13	0	0	2	7	18	0				16	4	9	19	13	0	0	8	17	0	12	3	35	13	0	10	3
9	3	0	0	0	1	7	0	1	0	1	2	0	0	0	10	0	20	0	0	0	0	1	17	17	2	4	10	3	13				7	9	3	6	6	0	0	12	19	4	19	14	30	18	17	7	29
0	19	10	0	0	9	0	0	0	0	4	8	4	0	4	8	0	5	0	4	3	0	6	20	5	5	25	24	20	10				20	9	20	9	16	0	6	20	37	21	25	9	48	51	25	18	18
69	14	59	0	42	109	44	0	61	26	118	66	24	0	40	18	69	94	0	23	55	0	48	40	8	27	20	43	13	36				95	25	60	46	108	0	53	60	103	66	87	60	54	74	90	70	38
15	42	18	0	28	15	30	0	4	3	0	46	8	0	14	5	62	50	0	5	12	0	13	21	12	19	1	48	0	28				59	20	15	14	63	0	38	17	38	40	15	26	48	19	11	52	35
45	3	50	0	15	11	45	0	0	3	73	64	24	0	35	21	29	41	0	6	1	0	9	15	16	41	0	51	0	25				10	14	41	0	66	0	11	42	26	37	20	4	44	41	0	38	22
5	13	27	0	30	27	2	0	0	0	20	0	4	0	3	0	6	28	0	23	8	0	55	2	6	0	0	39	18	14				11	8	28	56	59	0	55	11	49	15	4	11	28	31	0	27	23
0	0	0	0	13	1	32	0	0	0	3	0	0	0	4	1	0	1	0	0	28	0	10	5	8	0	29	3	0	24				10	32	39	71	64	0	20	17	26	57	4	19	46	18	0	37	36
0	3	0	0	6	53	1	0	0	0	0	13	2	0	3	32	0	0	0	0	77	0	3	19	2	8	0	31	12	35				2	9	27	57	55	0	43	0	6	31	0	37	31	25	0	48	52
0	0	0	0	0	0	0	0	0	0	0	83	0	0	20	10	9	39	0	0	15	0	21	0	3	9	15	22	4	20				34	17	48	50	56	0	40	0	1	29	0	36	21	26	0	45	35
0	0	8	0	8	0	0	0	0	0	0	40	17	0	2	34	0	3	0	0	20	0	11	0	0	7	0	35	17	39				33	2	38	57	51	0	18	4	42	32	0	22	35	9	0	67	14
4	0	15	0	0	0	0	0	0	19	0	0	0	0	2	30	22	18	0	6	18	0	13	4	16	0	0	7	0	7				7	0	36	16	46	0	58	24	14	26	0	21	12	0	0	32	28
22	0	22	0	0	3	0	0	16	3	0	52	0	0	16	13	15	4	0	10	34	0	3	2	7	0	0	0	0	0				6	19	48	16	55	0	34	15	0	18	0	19	6	0	0	23	31
0	0	44	0	0	0	0	0	10	3	0	42	48	0	26	3	23	22	0	0	29	0	0	12	1	0	0	19	18	27				3	11	29	32	43	0	21	15	10	44	0	28	17	0	0	27	33
0	0	37	0	7	0	8	0	4	0	0	11	3	0	0	0	29	23	0	2	9	0	10	24	8	0	0	2	12	27				8	26	41	42	44	0	68	17	7	22	0	31	29	0	0	42	11
5	0	28	0	0	7	1	0	7	0	0	29	0	0	19	0	16	15	0	0	0	0	14	11	5	0	3	11	2	26				7	9	33	4	31	0	38	16	17	41	0	39	36	3	0	19	29
2	0	23	0	9	0	46	0	20	11	4	30	9	0	6	0	0	6	0	56	45	0	14	0	8	0	0	4	19	0				8	5	30	2	29	0	45	16	14	35	0	26	12	7	0	20	28
0	0	22	0	4	0	32	0	0	34	0	4	0	0	5	6	0	1	0	2	12	0	44	12	7	0	0	0	3	0				5	33	30	4	25	0	58	21	21	18	0	22	33	17	0	37	53
26	0	0	0	15	0	0	0	0	7	25	0	0	0	17	2	48	30	0	48	10	0	5	0	5	2	0	19	0	3				2	0	38	21	16	0	24	32	18	14	0	45	24	24	0	30	33
34	0	0	0	0	9	0	0	18	0	10	0	10	0	45	18	47	17	0	2	14	0	15	10	0	0	0	0	19	0				0	25	33	19	26	0	12	25	0	15	0	44	8	8	0	31	23
35	0	0	0	0	2	0	0	0	0	0	54	18	0	33	25	7	6	0	2	22	0	3	11	17	0	0	14	2	0				26	13	36	10	24	0	46	21	0	27	0	27	15	34	0	46	29
0	1	2	0	0	3	6	0	0	11	0	20	32	0	40	0	5	22	0	2	13	0	2	2	19	0	0	25	14	7				48	8	22	20	20	0	35	11	0	27	0	22	10	18	0	35	29
5	7	0	0	15	22	3	0	0	7	0	0	0	0	28	0	0	5	0	1	0	0	4	0	44	0	1	0	0	12				1	7	29	32	41	0	14	9	0	27	0	66	41	2	0	34	37
76	19	0	0	0	17	40	0	9	11	0	0	0	0	15	0	0	0	0	54	23	0	4	0	5	0	43	0	11	0				7	11	23	33	35	0	6	2	11	13	0	47	4	0	0	29	24
59	77	0	0	9	10	2	0	14	4	0	0	0	0	30	0	0	0	0	14	8	0	0	9	5	0	0	0	11	3				13	0	29	6	17	0	67	32	4	23	0	35	18	14	0	2	22
13	13	0	0	0	61	1	0	1	36	8	0	9	0	14	8	10	0	0	12	14	0	6	9	4	0	0	29	12	0				11	0	18	33	36	0	44	2	0	10	12	35	16	0	0	11	20
26	20	32	0	6	23	14	0	15	12	4	10	1	0	39	74	15	0	0	15	27	0	4	0	35	0	0	0	0	0				1	27	39	34	49	0	38	2	25	27	0	26	19	35	0	7	41
Daily crossings
DMSO	100 μM amitraz	1 mM amitraz
8.63	10.16	3.85
4.23	6.27	7.17
4.24	6.37	11.47
3.35	10	10.8
12.67	6.67	14.93
4.37	9.28	10.33
11.94	7.26	7.91
2.4	5.03	15.16
9.98	2.7	8.66
5.23	8.65	13.76
1.88	5.54	12.48
2.52	5.23	10.02
5.76	4.11	11
3.59	6.48	7.19
4.26	3.75	10.79
2.41	9.17	4.98
9.63	5.71	9.84
3.78	6.82	5.95
5.31	11.36	15.03
3.16	9.62	9.52
1.47	5.59	11.53
6.53	5.43	14.44
1.54	12.59	9.78
14.09	9.46	10.29
1.19	4.62	6.99
2.09	6.08	11.61
4.57	16.97	5.74
3.78	6.1	3.55
1.4	7.42	9.33
7.61	4.81	7.37
1.28	19.57	11.27
2.18	8.43	6.79
3.69	7.85	5.2
2.29	6.56	22.09
5.21	7.89	9.58
5.87	5	10.99
2.74	12.4	16.67
6.38	14.69	9.91
2.01	4.99	12.36
5.72	6.82	14.87
3.31	7.55	11.37
4.81	9.56	12.54
3.1	7.64	13.22
4.4	6.67	10.29
2.94	15.05	10.82
2.22	12.58	9.48
4.34	13.38	5.5
2.24	4.57	14.15
2.63	4.6	14.01
1.76	9.22	13.4
1.37	10.61	15.14
2.5	4.83	10.98
5.25	3.69	4.6
2.28	16.25	9.8
5.01		14.08
2.86		9.55
1.99		6.19
2.7
3.83
1.76
5.89
[truncated: 45 more columns]

## Sheet: Figure 3B
Figure 3B oambattp
Crossings per 30 min
DMSO																																			100 uM Amitraz
13	54	20	49	44	41	37	53	49	25	34	47	44	9	28	13	67	17	13	39	40	56	27	50	46	69	13	66	19	51	28	73				62	41	66	74	63	66	26	117	32	65	46	65	73	16	33
1	41	8	18	21	2	0	9	50	0	24	23	0	2	0	16	5	0	0	4	7	32	10	44	16	46	0	12	0	14	0	38				15	40	0	38	28	27	4	62	36	50	5	36	33	10	0
0	12	0	7	3	0	0	9	28	0	13	0	0	0	0	0	2	0	0	0	0	0	0	26	19	38	0	7	2	0	0	0				0	7	0	67	2	14	0	69	26	11	0	12	24	2	7
0	0	0	8	5	0	0	5	0	0	0	0	0	0	0	0	0	3	0	0	0	0	0	6	6	13	0	0	2	0	1	12				0	2	0	59	0	9	0	68	35	25	3	15	21	1	0
0	0	0	15	0	0	0	0	0	0	11	0	0	0	0	6	0	1	0	0	0	0	2	0	0	0	0	0	0	0	7	0				0	3	0	55	0	10	0	69	36	64	0	36	32	6	3
0	0	17	2	1	0	0	0	0	0	0	0	0	0	9	0	0	0	0	0	0	0	0	0	0	0	0	0	0	0	9	4				9	10	0	41	0	18	2	69	32	13	0	13	54	1	2
11	4	1	24	0	0	0	0	0	0	0	0	0	0	0	0	0	11	0	0	11	0	0	0	0	0	0	0	0	0	8	0				0	4	0	71	0	22	0	69	24	6	0	18	15	1	2
3	8	0	8	0	0	0	0	0	0	0	0	0	0	0	0	0	1	0	0	0	0	11	0	0	0	0	0	3	0	21	0				0	0	0	37	0	8	0	70	85	6	0	38	20	38	0
0	0	0	12	0	0	35	0	0	0	0	0	0	0	0	0	0	20	0	0	0	10	19	0	0	0	0	0	1	0	2	0				0	1	0	79	0	12	0	70	0	9	0	58	33	3	0
14	0	0	5	0	0	0	1	45	0	0	0	0	0	1	0	0	26	1	0	0	0	2	0	0	0	0	0	22	0	0	0				1	0	0	56	0	13	0	69	78	0	0	17	9	0	0
0	8	0	5	0	0	0	0	0	0	0	0	0	0	2	2	0	0	0	8	0	0	6	0	0	0	0	0	9	0	0	0				0	0	0	50	0	21	0	69	22	10	0	26	11	4	0
0	0	0	7	0	0	0	0	0	0	0	0	0	0	6	0	0	0	0	4	0	3	9	0	0	0	0	0	3	0	0	0				0	0	0	66	0	16	0	70	14	35	0	52	10	0	0
0	0	0	6	0	0	4	0	0	0	0	0	0	0	0	0	0	0	0	0	0	5	0	3	0	0	0	0	0	0	0	0				0	0	0	67	0	23	0	69	11	0	0	47	1	0	0
0	0	0	5	0	0	0	0	0	0	0	0	0	0	0	0	0	0	0	0	0	5	0	0	0	0	0	0	0	0	0	1				15	0	0	57	0	21	0	68	64	11	0	47	6	0	0
7	0	0	19	0	0	16	0	15	0	0	0	0	0	0	17	0	0	6	0	0	0	0	0	0	0	0	0	0	0	0	2				0	0	0	56	0	37	0	67	2	7	0	41	10	0	0
0	1	0	8	0	0	41	0	7	0	0	0	0	0	0	9	0	0	0	0	0	0	0	0	0	0	0	0	4	0	0	14				0	0	0	43	0	31	0	67	0	0	0	33	10	0	0
6	0	0	10	0	0	13	0	0	0	0	0	0	0	0	0	0	0	1	0	12	0	0	0	0	0	0	0	0	0	0	4				0	0	0	55	0	27	14	65	0	16	0	34	9	0	0
0	0	0	5	0	0	34	0	0	0	0	0	0	0	0	4	0	0	1	0	7	0	0	0	0	0	0	13	0	0	0	1				0	0	0	27	0	24	4	66	0	6	0	33	21	0	0
0	0	0	11	0	0	0	0	0	0	0	0	0	0	1	9	0	0	0	0	0	0	10	0	0	0	0	0	1	0	0	1				0	0	0	96	0	32	0	66	0	3	0	52	11	0	0
0	0	0	10	0	0	0	0	0	0	0	0	0	0	10	6	0	0	5	0	0	0	0	0	0	0	0	22	0	0	0	0				0	0	0	72	0	12	2	65	0	9	15	28	17	0	0
0	0	0	3	0	0	19	0	0	0	0	0	0	15	0	4	0	0	0	0	0	0	28	0	0	0	0	7	0	0	0	25				0	0	0	57	0	23	4	66	0	0	6	50	12	5	0
0	0	19	13	0	0	0	0	0	0	3	0	0	15	0	4	0	0	0	0	0	0	2	0	0	0	0	4	0	0	0	12				0	0	0	38	0	46	0	64	0	0	3	26	12	0	0
0	0	0	42	0	0	7	0	0	0	0	0	0	0	0	3	0	0	0	0	1	0	34	0	0	0	0	6	1	0	0	0				0	3	0	33	0	25	0	64	0	1	5	37	0	0	0
0	0	0	9	4	0	7	41	0	0	0	0	0	0	0	0	0	0	0	0	4	0	10	0	1	0	0	9	0	0	0	10				0	2	0	26	0	32	0	64	0	62	7	31	36	0	0
17	0	7	23	33	18	40	9	10	59	13	10	1	10	22	0	47	9	11	16	23	0	30	30	51	29	35	13	27	19	35	0				19	29	6	20	24	8	0	136	0	21	50	14	29	0	17
3	0	23	31	25	16	23	32	9	10	23	0	0	16	35	1	40	18	5	6	8	0	5	12	30	25	40	19	23	24	3	6				1	4	16	34	17	1	0	139	0	57	11	62	39	0	0
0	0	6	15	13	24	65	10	5	47	5	0	0	0	35	0	37	11	16	0	7	0	2	23	67	20	38	4	9	6	9	2				0	0	14	90	0	17	68	132	0	28	0	0	21	0	0
0	0	1	11	6	18	1	11	4	1	5	0	1	2	29	0	28	3	1	0	27	0	52	45	51	6	20	15	2	9	9	1				0	88	37	102	6	7	26	130	0	63	7	50	0	10	0
21	9	0	0	14	6	20	4	1	0	62	0	3	2	14	0	20	1	0	1	0	0	30	7	24	25	5	19	1	5	23	4				0	6	26	107	3	0	5	163	0	10	0	18	0	72	0
0	4	0	7	8	7	0	0	0	0	3	0	0	0	32	0	16	9	0	9	0	0	5	6	32	7	0	0	0	1	0	0				0	9	50	63	0	0	16	136	0	0	0	70	3	0	0
0	0	0	0	0	0	10	0	40	0	0	0	0	0	0	8	0	0	0	0	29	0	1	0	0	0	2	0	0	0	17	15				24	27	22	76	17	22	22	143	1	16	45	26	2	10	6
0	4	0	7	8	7	0	0	0	0	3	0	0	0	32	0	16	9	0	9	0	0	5	6	32	7	0	0	0	1	0	0				0	5	2	69	21	0	4	210	0	0	1	42	8	0	6
20	2	3	0	0	0	0	0	2	10	6	11	0	56	0	3	7	0	0	0	0	14	21	0	0	0	5	0	0	0	0	0				3	10	0	21	0	0	12	162	0	4	27	28	29	7	0
0	14	0	0	0	0	0	0	10	0	40	0	0	0	0	0	0	8	0	0	0	0	29	0	1	0	0	0	2	0	0	0				0	12	0	44	0	0	10	130	0	0	13	1	0	3	18
0	1	16	0	0	0	0	49	29	0	29	0	0	0	0	0	4	0	0	0	0	0	6	0	0	3	2	0	6	0	0	0				36	49	1	13	0	0	5	128	0	19	1	59	7	24	11
17	0	14	0	0	0	0	4	14	0	25	0	0	0	0	0	25	1	0	0	0	0	18	0	0	0	3	0	2	0	0	0				0	3	0	37	19	0	5	130	0	0	8	16	0	21	18
5	2	0	0	0	0	1	5	2	0	0	1	0	1	0	6	5	0	0	0	0	0	0	0	0	1	0	6	0	0	0	0				0	18	0	29	0	0	0	130	0	49	26	30	6	33	0
0	1	28	1	0	0	0	7	7	0	0	0	0	2	0	0	1	0	0	0	0	0	0	0	0	0	0	0	0	0	0	0				18	28	0	11	54	0	0	130	0	0	0	43	6	26	0
0	0	0	18	0	0	0	1	4	0	0	24	0	10	0	0	0	0	0	0	0	0	0	19	0	0	0	0	1	0	0	0				102	7	47	59	65	0	3	132	0	17	3	5	0	21	82
0	0	0	105	0	0	0	0	16	0	0	0	0	3	0	0	0	18	0	0	0	0	0	2	0	3	0	6	3	0	0	0				12	5	0	49	0	15	0	132	0	1	21	19	2	21	0
0	0	0	43	0	0	0	0	25	0	0	0	0	36	0	0	0	36	0	0	0	0	23	3	0	0	0	0	0	0	0	0				69	36	11	51	30	26	0	133	0	27	4	65	2	1	0
0	0	0	22	0	0	0	0	27	0	3	0	0	21	0	0	0	0	22	0	0	0	10	8	0	0	0	0	0	0	0	0				18	62	0	18	13	25	11	133	0	57	0	12	39	10	12
0	0	0	23	0	0	0	0	22	0	0	0	0	31	0	0	0	0	21	0	0	0	11	0	0	0	0	0	0	0	0	0				87	11	0	22	14	13	0	132	0	2	27	100	21	0	9
0	20	0	3	0	0	0	0	31	0	13	0	0	0	0	0	0	10	29	0	0	19	3	0	22	0	0	0	0	0	0	2				0	1	4	24	0	3	50	134	0	3	0	17	45	34	30
0	2	0	0	0	0	0	0	20	0	29	0	0	3	0	0	0	0	2	0	0	3	0	0	65	0	0	31	0	0	81	0				19	38	1	11	0	0	55	132	0	1	28	0	15	13	29
0	17	0	0	6	0	0	0	27	0	0	0	0	27	0	0	37	0	0	0	0	0	0	0	21	0	0	23	0	0	5	0				34	10	22	20	0	0	5	134	0	82	2	7	12	12	8
0	3	0	0	28	0	0	0	35	10	0	0	0	8	0	0	1	1	0	1	0	1	0	0	1	0	20	14	0	0	47	0				92	1	21	22	24	1	0	134	0	3	2	2	0	6	113
0	30	0	4	6	1	5	0	33	1	0	86	0	0	0	0	69	2	19	0	0	1	71	0	0	0	0	1	15	0	2	1				0	1	16	22	7	21	15	132	0	89	16	13	4	19	11
28	45	10	6	64	22	50	11	6	20	35	57	5	29	26	19	21	13	18	8	36	33	33	25	36	26	1	43	43	13	56	13				36	19	48	46	54	76	30	88	0	30	51	42	74	16	40
0	13	0	9	68	0	15	0	5	9	8	0	0	15	0	0	1	0	12	2	0	28	4	0	0	0	0	0	8	0	20	0				13	7	12	45	25	46	27	63	0	17	21	23	63	0	8
6	2	0	0	78	0	54	0	0	0	0	0	0	15	1	1	2	9	18	0	0	0	1	2	0	0	0	0	0	0	22	0				7	6	5	38	12	23	8	70	0	31	16	15	59	7	11
2	3	0	0	28	0	27	0	0	2	0	0	0	14	6	1	0	3	8	4	0	0	0	0	0	0	0	0	13	0	19	0				4	3	6	40	16	27	23	64	0	7	10	27	45	4	15
7	17	0	0	9	0	6	1	16	17	20	0	0	23	11	0	1	5	7	0	0	0	14	0	21	0	0	0	0	0	0	4				0	2	17	33	22	24	13	68	0	18	4	18	58	2	2
0	0	3	0	8	0	31	0	6	4	0	0	0	6	9	44	0	7	2	0	0	2	0	0	19	0	0	0	14	8	5	0				0	1	3	65	14	27	29	64	0	3	2	27	64	5	5
0	6	26	7	9	0	5	2	0	0	3	0	0	0	1	6	0	9	7	0	0	15	0	0	0	0	0	0	15	0	7	9				0	1	2	59	24	30	9	64	0	6	3	16	64	3	12
0	0	6	8	8	0	7	0	5	11	3	0	0	14	0	0	0	0	10	13	0	0	0	0	2	6	0	7	8	2	16	10				0	4	3	58	20	31	18	64	0	19	16	18	61	8	15
0	0	0	7	20	0	20	0	0	14	28	0	0	2	0	1	0	0	14	0	0	0	25	0	0	0	0	0	1	0	21	0				0	2	2	79	28	22	8	63	0	9	0	11	47	17	31
0	23	2	19	8	0	9	0	0	0	2	0	0	0	1	14	0	0	4	0	0	22	0	3	0	0	0	3	2	0	11	0				10	1	8	58	51	28	19	73	0	2	6	16	42	4	11
18	2	4	2	0	0	5	0	0	0	8	0	0	0	3	11	0	3	2	0	0	8	0	0	0	4	0	0	15	0	4	0				3	8	14	53	14	28	17	77	0	1	14	35	53	6	34
5	0	12	14	19	0	46	0	12	0	15	0	0	4	0	9	0	0	0	0	0	0	34	0	0	0	0	4	3	3	6	0				0	29	7	23	23	25	26	88	0	0	12	19	35	16	19
0	0	9	30	0	0	13	0	14	0	18	0	0	14	0	13	0	3	1	15	0	0	0	0	0	19	0	0	4	0	8	0				1	16	5	33	20	16	6	70	0	8	7	16	32	0	10
0	16	0	14	21	0	0	0	2	12	9	0	0	0	0	9	0	0	0	0	0	0	28	0	0	0	0	0	15	0	8	0				0	44	6	43	38	22	6	66	0	10	9	10	53	0	10
4	0	1	11	4	0	0	0	13	4	15	0	22	1	0	2	0	0	0	0	0	0	0	0	0	0	0	0	12	0	12	0				2	53	4	10	11	13	8	70	0	1	2	21	32	4	12
5	7	0	20	0	7	24	12	4	8	9	0	0	0	0	15	0	0	1	17	0	2	0	0	0	28	0	0	4	0	6	0				0	26	10	28	28	16	16	83	0	20	2	19	37	0	24
0	1	0	1	6	0	0	0	23	4	6	0	0	0	13	13	0	0	5	11	0	2	3	1	0	0	0	0	2	14	7	0				0	11	0	34	21	25	18	76	0	0	4	20	46	16	4
0	1	0	1	0	42	20	0	54	23	0	0	0	8	0	0	0	0	0	16	0	7	11	5	0	1	0	0	7	12	4	0				0	4	2	46	34	29	5	72	0	2	15	32	51	11	13
0	0	0	0	27	28	0	0	34	3	2	0	0	0	0	11	43	11	0	5	0	39	0	0	0	0	0	0	14	13	2	0				0	0	0	34	13	23	6	74	0	0	5	30	47	17	2
0	0	0	16	19	8	16	0	0	0	5	3	0	0	0	2	4	0	0	0	0	0	0	0	0	1	0	14	47	10	33	0				0	5	3	16	13	23	11	84	0	0	0	20	49	7	5
21	0	18	0	13	20	31	25	0	0	0	46	0	0	0	0	0	0	0	0	11	11	10	0	0	1	0	0	10	3	5	0				0	12	1	29	3	14	10	76	0	29	2	16	33	13	0
9	28	18	6	4	0	3	0	0	0	13	2	0	0	0	0	0	0	1	5	4	0	0	0	0	5	0	0	0	0	48	0				0	6	3	18	25	21	7	71	0	16	2	21	44	0	13
0	18	0	4	2	0	53	4	0	0	0	3	2	0	0	0	0	4	0	0	0	16	0	0	0	0	0	0	0	0	22	0				0	15	19	6	3	16	7	77	0	1	2	45	46	0	9
0	0	0	11	21	6	15	12	0	0	8	0	0	3	0	2	0	17	4	2	0	0	0	0	0	19	0	9	32	0	2	19				0	7	5	49	17	21	17	90	0	10	3	24	44	0	7
2	28	64	33	40	18	18	22	35	37	28	56	24	13	6	45	48	8	38	11	5	24	14	20	41	7	31	63	17	2	20	31				16	6	70	5	15	19	13	198	0	7	39	26	11	23	2
0	0	0	11	11	3	2	16	2	4	1	1	12	10	0	3	41	4	6	9	2	0	36	6	15	1	24	43	17	0	0	0				37	0	0	23	3	16	5	144	0	0	7	2	2	3	9
0	18	5	13	2	22	0	0	15	3	0	0	1	1	2	4	22	32	33	9	0	0	38	3	3	4	13	40	18	0	2	0				43	18	0	40	10	17	9	143	0	4	1	3	3	8	4
30	2	80	15	36	0	0	0	4	27	0	0	11	0	0	0	19	3	0	8	35	0	19	34	1	0	0	26	15	37	0	0				24	0	1	55	3	8	1	144	0	0	5	2	0	48	4
23	49	66	0	28	0	0	12	0	22	2	0	13	0	0	0	9	23	9	10	0	0	0	45	2	0	0	9	14	0	5	0				27	25	22	44	5	0	4	165	0	3	2	2	0	8	2
16	6	1	7	0	0	12	0	0	42	0	0	16	0	0	0	16	7	0	0	0	0	0	6	0	0	0	16	0	6	6	0				23	52	12	25	42	0	23	147	0	50	0	0	0	7	5
0	15	28	5	0	8	16	0	22	15	0	0	27	0	0	0	6	1	0	0	29	0	1	3	49	0	0	4	0	0	0	0				24	48	15	21	6	10	26	140	0	14	6	2	19	3	4
8	0	25	5	0	13	0	0	25	0	0	0	21	0	0	0	5	2	0	0	0	0	4	0	54	11	0	0	0	0	5	0				27	75	4	35	1	17	13	136	0	0	0	48	14	25	1
0	0	12	40	0	11	0	19	20	1	0	0	13	0	0	0	0	8	0	123	0	0	0	0	53	0	21	0	0	0	0	0				39	20	1	63	22	26	14	133	0	0	0	0	16	3	9
0	56	3	1	0	0	0	11	1	45	0	0	12	0	0	0	10	1	5	29	0	0	0	0	55	0	0	0	0	0	2	0				42	41	23	48	24	34	5	136	0	2	5	59	0	24	37
0	4	23	0	0	9	0	5	0	45	0	0	32	0	0	0	4	12	17	0	3	0	0	0	57	0	0	0	0	0	6	0				57	19	5	10	5	19	10	167	0	1	3	21	2	1	47
0	15	3	0	0	0	1	0	0	36	0	0	24	0	0	0	0	0	0	42	0	0	2	0	58	0	0	0	0	0	0	0				44	10	39	1	15	3	9	139	0	0	4	0	14	28	21
0	2	0	0	0	0	0	0	0	6	0	0	38	0	0	0	0	0	0	15	0	0	0	0	54	0	0	0	0	0	0	0				42	26	3	7	9	18	13	136	0	3	29	10	0	17	18
0	17	0	14	0	14	0	0	0	37	0	0	22	0	0	9	1	0	0	0	0	0	0	0	55	0	0	0	0	0	0	0				59	44	14	10	10	28	11	136	0	38	3	0	0	14	21
0	12	0	0	10	0	0	0	1	0	0	0	20	0	0	1	0	0	0	6	0	0	4	0	49	0	0	0	0	0	0	0				61	25	0	12	6	31	25	139	0	71	0	0	2	5	0
0	13	0	0	6	0	0	0	2	1	0	0	31	0	0	2	0	0	0	0	0	0	0	0	40	0	0	0	0	0	0	0				52	47	3	13	2	69	12	163	0	65	1	0	8	1	0
0	2	0	0	0	0	0	0	0	0	0	0	30	0	0	0	0	0	0	0	0	0	0	0	47	0	0	0	8	0	0	0				69	4	21	7	11	15	8	140	0	43	0	0	0	0	40
0	14	0	0	3	0	0	0	5	28	0	0	26	0	0	0	0	0	0	0	0	0	0	0	45	0	0	0	0	0	0	0				63	47	8	5	4	8	4	140	0	11	2	0	12	78	5
0	6	0	0	32	0	0	0	0	7	0	0	29	0	0	19	0	0	0	0	0	0	0	0	46	0	0	0	2	0	0	0				74	19	10	6	26	3	25	140	0	0	1	16	24	11	0
0	0	0	6	0	4	0	0	0	14	0	0	31	0	0	4	1	0	0	75	0	0	0	0	35	0	0	0	0	0	0	0				72	5	2	28	10	2	6	142	0	0	16	22	0	3	0
0	6	0	17	0	0	0	0	0	3	0	14	42	0	0	24	0	0	0	0	0	0	0	0	58	0	0	0	0	0	0	0				52	0	3	21	14	36	0	147	0	4	3	0	12	2	0
0	9	0	0	0	0	0	0	1	9	0	56	28	0	0	7	0	0	0	0	1	0	3	0	43	0	0	0	0	0	0	0				13	8	20	17	4	1	12	158	0	5	0	0	0	1	4
0	16	0	0	7	5	0	0	1	0	0	4	43	0	0	0	1	0	0	0	2	0	1	0	45	0	0	0	0	0	11	26				6	33	6	9	14	9	14	144	0	3	13	0	3	31	1
0	13	0	0	3	3	3	0	11	8	0	8	30	0	0	0	5	0	0	0	16	0	1	0	55	6	0	0	1	0	11	17				25	4	24	8	27	18	15	171	0	30	32	9	8	32	2
18	33	13	12	57	22	61	24	42	19	25	51	0	38	4	48	39	22	58	35	25	42	38	15	77	63	20	34	23	12	53	25				18	36	35	26	52	64	8	104	0	38	31	54	52	36	31
12	9	0	10	58	12	49	0	9	2	3	54	0	32	0	27	6	31	9	26	15	31	41	0	22	27	29	24	17	4	13	0				7	14	24	18	14	30	23	65	0	15	15	20	52	8	29
10	0	0	2	69	13	58	1	26	2	37	0	0	0	0	14	0	24	3	20	3	26	21	0	17	0	14	24	12	0	36	0				0	1	8	6	19	23	19	74	0	12	12	14	51	5	9
8	0	0	3	51	27	53	0	19	12	1	0	0	0	0	28	0	37	4	23	1	2	18	0	0	0	16	37	13	0	49	2				0	0	21	44	18	21	23	75	0	9	0	15	40	2	23
18	0	47	29	58	11	31	15	24	0	0	0	0	19	0	10	8	48	4	0	33	0	2	0	3	0	2	2	14	1	44	0				0	0	19	10	11	30	23	44	0	4	4	12	34	19	8
11	7	0	0	60	18	23	0	16	12	4	0	0	19	0	29	0	42	4	0	25	0	19	0	0	0	0	4	3	2	14	0				0	0	19	15	31	13	20	62	0	0	0	28	38	12	4
14	3	15	0	52	4	10	0	23	0	5	0	0	20	0	4	0	57	0	19	18	0	11	0	4	0	3	32	1	4	51	0				0	0	6	7	29	18	20	50	0	3	4	46	30	14	3
51	0	0	11	94	10	52	25	18	0	0	0	0	0	0	1	0	75	31	5	0	2	3	0	8	0	0	11	13	0	33	3				0	0	7	15	12	25	31	65	0	4	3	47	38	6	8
46	11	0	3	76	4	51	0	16	0	4	6	0	0	0	0	0	62	17	2	30	1	0	0	6	0	1	3	14	9	15	0				0	0	30	6	28	19	24	58	0	7	0	50	40	1	2
35	3	0	7	67	0	31	0	30	0	0	0	0	8	3	5	0	55	17	0	0	0	2	0	16	0	0	7	3	13	49	0				0	0	15	20	13	21	11	61	0	6	5	54	29	5	3
59	11	0	4	72	1	54	0	25	0	0	0	0	0	0	76	0	51	2	0	0	0	29	7	43	0	0	6	10	13	20	0				0	0	6	43	3	17	21	54	0	2	3	69	0	2	17
64	4	0	11	57	22	33	0	44	0	0	0	0	0	0	0	0	60	4	11	24	0	39	0	56	0	0	0	6	0	13	4				0	0	15	50	19	17	11	36	0	0	1	73	0	0	0
81	6	10	16	43	0	53	0	71	0	19	0	0	0	5	9	0	55	18	4	3	4	30	0	39	0	4	6	1	0	17	0				0	0	10	33	9	11	9	36	0	0	0	103	0	4	7
64	0	0	12	41	10	36	0	35	7	10	0	0	0	9	0	0	73	11	11	0	0	22	0	26	0	2	4	13	0	25	0				0	0	4	45	12	20	17	56	0	15	9	58	0	5	0
78	4	0	0	51	0	35	0	57	0	8	0	0	14	0	16	0	52	12	0	0	3	49	0	9	0	0	6	7	15	43	0				0	0	14	34	3	21	14	62	0	18	1	0	0	1	4
76	1	0	2	40	1	34	0	43	13	0	0	0	27	0	3	0	46	14	0	6	0	16	0	0	0	20	2	28	8	13	0				0	0	41	6	16	18	29	74	0	0	2	0	0	18	5
73	8	0	0	44	21	46	1	56	0	0	2	0	8	2	0	0	41	2	0	7	0	0	5	14	0	0	0	8	0	5	0				0	0	6	10	24	15	34	90	0	5	5	0	0	1	3
53	0	0	1	58	43	43	1	59	0	0	0	0	10	0	19	0	31	7	0	6	0	23	0	32	0	0	0	11	0	27	0				0	0	0	39	10	23	14	37	0	0	0	0	0	2	8
13	0	0	16	41	11	59	12	62	1	0	0	0	0	0	0	0	0	33	0	21	2	38	0	23	0	0	10	14	14	26	0				0	0	16	32	20	18	8	46	0	0	0	0	0	3	3
0	5	0	20	0	84	64	9	49	0	0	0	0	9	0	16	0	0	0	0	2	0	27	8	38	0	0	18	7	0	36	0				0	0	1	6	0	21	38	41	0	1	0	0	0	0	0
0	0	0	6	0	7	63	8	56	0	2	0	0	59	0	2	0	0	0	3	0	0	29	0	0	0	2	7	17	0	24	0				0	0	2	0	9	17	13	12	0	0	1	0	0	0	0
0	15	0	0	0	2	54	3	31	65	22	0	0	21	0	0	0	0	6	0	0	0	19	2	0	0	6	17	18	0	24	12				0	0	13	4	8	14	11	35	0	0	2	0	0	3	5
0	0	2	0	0	0	77	14	29	0	13	0	0	24	0	1	0	0	4	4	4	8	33	0	6	0	0	0	2	0	26	8				0	0	0	11	14	14	8	25	0	9	0	0	0	0	0
0	0	27	3	0	4	72	42	13	0	4	0	0	27	0	0	0	0	10	31	0	2	21	0	10	0	1	2	31	0	37	0				0	0	19	7	5	31	20	26	0	1	0	0	0	0	3
Daily crossings
DMSO	100 μM amitraz	1 mM amitraz
8.63	6.31	13.38
2.35	10.99	22.71
8.49	13.57	23.07
4.86	11.22	18.31
6.01	18.32	14.09
5.88	13.84	27.77
5.79	9.68	17.25
6.6	17.52	17.02
5.64	17.2	15.97
3.25	26.49	15.04
3.32	7.57	4.44
6.94	24.36	17.43
7.45	12.32	5.81
6.2	8.22	15.78
6.11	29.81	10.81
7.97	14.73	19.69
6.28	18.58	10.43
5.65	10.62	14.72
7.33	14.86	15.84
6.75	14.05	18.64
2.57	14.56	18.99
3.52	22.94	18.1
3.12	15.8	13.91
4.64	22.72	11.78
4.23	8.61	20.04
5.81	8.67	10.79
8.23	13.57	8.83
4.69	10.17	7.6
5.63	14.64	18.63
3.52	9.5	18.71
7.2	10.45	13
4.9	11.23	26.36
3.54	6.75	13.3
3.11	11.41	23.29
4.47	13.4	14.81
7.25	13.59	20.96
4.27	13.14	13.65
7.73	8.77	14.54
5.52	8.39	9.54
5.35	11.41	8.71
6.17	6.45	15.85
4.3	9.99	18.47
6.75	13.38	19.29
5.75	8.89	10.05
6.84	5	11.76
5.21	14.38	17.82
2.66	10.34	17.51
3.02	9.81	16.32
7.21	9.07	16.49
6.25	11.01	13.78
4.79	10.12	17.47
	9.85	12.95
	11.55	9.17
	15.53	10.36
	12.9	12.87
	6.56	16.96
	9.53	12.29
	12.53
	3.48
	11.64
	17.68
	9.31
[truncated: 49 more columns]

## Sheet:  Figure 3C
Figure 3C octβ1R
Crossings per 30 min
DMSO																																			100uM Amitraz
64	96	66	76	106	82	95	71	123	85	103	63	12	54	103	98	82	108	112	82	111	155	90	98	89	153	97	82	102	114	105	127				1	1	0	26	49	10	12	2	65	0	6	30	10	2	18
19	76	0	70	39	91	19	67	73	22	33	36	8	66	16	126	68	95	66	40	94	115	104	93	51	117	101	73	75	93	84	96				1	21	4	2	0	8	8	1	1	0	1	53	22	0	31
5	13	0	41	0	73	3	40	2	0	0	0	3	45	1	7	19	45	20	0	55	46	78	28	2	4	69	0	55	62	64	41				1	31	3	41	1	1	62	53	93	0	1	24	6	15	12
0	3	0	0	0	22	0	12	22	3	0	0	1	4	4	0	6	31	0	0	8	0	46	0	0	2	2	0	6	0	0	11				11	0	4	102	5	55	0	3	9	0	0	7	13	97	5
23	8	0	0	0	6	0	0	66	0	0	36	6	0	0	0	14	0	0	4	3	1	10	0	0	1	0	12	11	0	0	3				10	0	22	147	57	0	0	66	4	0	1	2	3	11	2
0	42	0	4	0	0	12	0	0	0	0	0	9	31	0	0	0	29	0	0	6	0	4	0	6	0	0	5	68	31	0	0				17	32	38	42	27	49	0	0	1	1	21	40	4	4	8
12	0	0	2	0	24	0	14	0	5	0	0	0	3	0	13	10	30	0	0	4	0	10	0	0	0	0	0	22	79	0	0				79	0	12	26	9	18	0	1	1	3	2	11	17	0	2
0	54	0	0	0	0	0	6	61	0	0	0	12	13	0	6	18	0	0	12	3	0	2	0	0	0	0	21	0	0	14	17				1	28	13	3	58	20	2	5	11	17	1	13	20	0	7
9	0	1	0	0	26	0	0	0	0	0	0	9	0	0	2	0	40	0	1	7	0	15	0	0	0	0	0	12	0	0	0				31	0	0	1	3	26	56	23	4	1	0	9	34	0	87
0	0	11	0	0	0	0	0	0	0	0	0	11	3	0	0	40	0	0	0	6	0	26	0	0	0	0	1	1	0	0	0				48	0	0	9	114	30	0	60	31	3	1	7	13	11	28
16	69	0	2	0	32	0	3	0	0	0	15	0	0	0	0	1	44	0	0	0	0	68	83	11	0	7	16	4	15	13	0				151	0	0	11	2	10	0	3	4	2	2	12	44	14	13
0	0	0	0	0	70	0	0	34	0	4	44	0	11	0	10	22	25	0	0	0	0	17	0	2	0	45	0	6	43	17	0				0	0	15	24	3	6	27	0	59	38	1	21	16	11	51
0	34	0	61	2	21	0	0	0	0	0	0	0	0	0	1	4	43	0	0	19	3	39	13	0	4	48	0	76	18	0	0				18	0	29	13	35	3	95	97	22	35	1	0	32	71	7
0	20	3	11	47	1	0	6	0	0	0	0	0	14	8	24	0	0	0	0	1	6	0	7	0	9	0	0	60	55	15	2				0	28	26	0	0	5	13	29	70	1	2	0	16	30	16
7	0	5	0	0	37	0	0	24	0	0	0	0	10	28	9	0	0	0	4	7	31	12	17	20	8	4	0	64	0	80	0				12	0	7	2	4	3	0	36	29	13	54	0	25	64	11
0	29	1	0	35	6	0	0	2	0	0	0	0	0	42	0	28	27	0	22	5	7	21	3	52	6	38	24	22	0	65	0				28	0	7	7	16	1	8	9	2	6	1	25	31	57	1
0	90	0	0	3	0	5	0	0	5	0	0	0	0	0	0	4	13	0	29	0	7	18	1	0	14	52	73	44	0	4	0				2	0	63	2	6	54	76	115	25	0	2	30	19	0	141
6	0	6	0	0	0	0	0	0	0	0	0	34	0	0	0	10	0	0	4	0	4	25	84	0	4	27	57	61	26	25	0				3	0	44	1	3	32	12	103	119	10	1	12	6	9	47
1	0	0	0	0	4	0	18	2	0	0	0	0	13	0	0	0	55	0	20	2	6	72	0	53	50	48	1	69	71	12	0				70	0	2	78	14	26	26	73	11	11	0	2	5	4	25
0	79	0	0	16	6	13	4	23	0	3	0	3	0	0	0	16	13	15	6	8	0	14	0	15	42	57	17	59	5	62	0				0	22	0	99	14	1	0	56	98	23	1	0	61	0	14
0	60	0	0	0	3	0	0	1	0	28	0	0	28	0	19	0	0	2	0	43	0	0	24	10	0	14	28	16	28	0	0				0	41	0	2	0	2	3	75	90	10	13	65	20	0	11
0	1	0	0	0	0	2	0	0	0	0	23	0	6	0	12	21	0	0	0	73	0	20	0	22	0	27	0	81	0	0	0				0	61	2	2	2	12	48	112	22	4	29	38	51	0	34
0	11	0	53	48	0	1	0	0	26	0	34	3	4	0	62	6	0	0	2	15	0	13	0	57	0	51	0	71	0	0	0				74	39	38	1	25	1	19	13	65	88	4	5	26	46	0
35	102	0	64	36	9	17	27	0	59	6	10	17	3	0	9	0	43	10	26	58	4	70	9	50	0	39	50	67	68	69	0				310	0	3	1	0	43	72	28	49	2	2	0	12	5	4
36	94	0	66	88	53	79	62	76	58	91	59	68	81	37	81	68	76	67	86	99	82	87	94	77	68	98	90	82	111	75	21				64	25	20	42	38	55	28	45	23	29	6	8	3	133	13
48	71	0	77	115	68	87	77	63	102	69	57	34	73	44	79	76	69	55	73	98	81	88	103	82	73	73	90	64	68	75	19				63	14	70	47	18	17	50	18	5	29	2	85	8	98	23
16	68	0	62	76	52	113	56	65	40	59	52	41	57	32	64	80	66	57	51	79	63	72	96	77	83	73	81	77	73	66	18				106	4	19	78	5	7	25	55	48	54	2	38	34	88	13
27	60	0	62	55	61	55	48	50	15	48	46	10	56	0	71	87	82	51	63	91	67	86	91	75	70	65	81	79	66	62	62				42	16	13	68	57	21	22	96	13	15	5	26	2	145	37
20	103	0	44	50	65	51	49	43	23	50	40	34	51	8	55	67	68	38	48	78	67	96	79	41	68	79	65	58	61	59	66				34	42	51	17	21	33	46	145	24	36	85	54	24	124	23
11	40	0	28	62	88	50	45	69	22	45	37	29	47	20	53	51	70	35	56	62	99	73	118	36	55	39	75	66	65	53	68				91	34	29	31	117	18	4	28	21	20	42	30	27	98	20
0	62	0	25	43	57	44	46	78	42	6	43	45	35	3	55	60	65	54	54	80	74	97	89	62	59	86	61	81	56	52	60				25	9	49	50	10	9	1	94	42	18	32	5	5	101	7
0	0	0	33	17	41	40	33	55	12	40	40	0	1	0	50	68	49	28	46	69	115	71	63	18	55	68	13	52	24	48	42				66	18	24	54	6	11	1	42	44	24	1	46	11	100	33
12	0	0	20	0	40	0	25	85	2	7	24	0	0	0	28	31	29	15	12	82	30	76	91	48	25	53	2	51	48	33	34				7	3	89	35	33	12	27	33	25	18	7	0	4	93	14
35	0	0	11	0	50	0	0	61	0	0	22	0	12	0	10	58	23	4	21	72	0	60	78	13	38	0	3	72	17	22	23				72	16	5	48	2	5	1	62	93	60	8	2	5	85	7
0	5	0	0	0	19	0	6	62	0	9	0	23	0	0	9	24	0	0	26	60	0	84	16	40	6	6	19	38	0	3	23				65	2	49	79	10	47	9	110	48	6	0	11	2	154	7
53	1	0	0	6	98	41	0	42	0	2	2	0	14	0	0	15	0	6	2	28	0	67	24	0	1	6	0	20	0	0	0				91	25	58	26	33	11	0	62	73	42	20	1	1	124	15
2	71	0	13	20	24	4	0	27	1	0	0	8	19	0	11	14	0	9	7	13	0	40	0	0	0	0	0	39	0	0	0				75	4	188	1	43	2	0	21	18	33	16	24	35	84	29
2	2	0	24	3	60	9	2	44	0	34	0	4	2	0	25	7	0	5	1	0	0	55	0	5	0	7	8	0	0	0	0				149	0	105	24	5	73	15	73	1	13	3	75	46	101	3
0	0	0	2	0	35	0	4	92	1	0	1	8	2	0	17	41	1	4	11	17	0	49	0	27	0	13	13	28	0	0	0				35	50	280	6	8	36	74	116	177	39	102	9	39	104	77
0	0	0	0	0	56	14	1	27	1	0	5	2	0	1	16	41	0	10	1	7	0	22	0	9	27	21	8	0	0	0	1				34	1	7	30	1	12	72	33	43	51	23	21	0	101	0
18	0	0	0	4	22	26	19	0	0	0	11	4	0	2	11	41	0	5	0	1	0	39	0	0	27	6	1	8	12	0	7				13	2	62	8	29	22	0	71	0	13	2	0	40	83	56
0	0	0	0	7	19	0	0	65	3	15	0	0	0	0	6	65	0	0	19	12	0	3	14	24	39	35	6	29	56	0	7				72	1	221	5	8	0	2	29	5	50	43	2	6	121	74
6	0	0	0	0	19	9	0	63	42	0	0	0	0	86	10	60	0	2	0	20	0	3	9	23	19	3	12	3	25	0	0				31	0	0	36	12	19	103	75	39	147	50	93	49	114	0
8	39	0	0	0	37	4	0	95	0	0	3	0	0	32	6	9	17	0	5	20	0	4	6	2	31	26	23	49	4	0	9				50	11	139	14	2	0	99	73	3	25	0	22	40	117	16
0	0	0	11	8	60	1	2	2	0	0	6	1	0	16	2	44	8	2	8	56	0	21	0	0	43	40	36	25	27	0	7				47	64	52	24	66	0	77	33	16	80	8	81	1	87	64
4	14	0	5	70	22	0	35	33	10	34	48	0	1	23	6	57	28	26	0	40	0	26	2	33	46	1	59	43	44	0	0				68	0	69	6	1	12	1	90	48	1	71	1	3	109	47
55	57	0	26	62	48	31	17	53	12	18	30	16	3	49	23	50	40	49	0	79	45	0	6	24	51	47	53	81	43	29	58				90	6	93	14	9	26	1	40	6	66	1	11	2	70	31
46	75	0	57	41	43	27	27	57	50	46	43	35	0	40	37	83	62	52	39	63	55	30	0	43	71	52	72	84	55	49	106				30	0	13	9	14	24	0	34	32	176	1	25	19	136	1
65	108	0	90	78	74	28	74	115	64	65	71	38	76	82	81	90	105	73	66	114	128	85	68	79	124	95	99	101	74	92	86				1	56	33	52	16	22	10	21	13	12	15	13	12	30	13
40	52	0	85	61	75	18	71	67	27	52	39	2	78	83	91	69	94	105	52	91	95	99	76	69	119	97	89	73	32	84	74				94	53	35	50	6	72	0	28	14	8	1	31	26	26	17
33	29	0	39	54	71	2	43	0	0	0	2	4	42	57	33	61	74	51	16	73	71	95	38	62	24	34	47	84	0	71	22				1	48	35	28	3	38	0	23	18	51	2	9	19	18	0
20	41	0	0	7	51	0	0	0	4	0	0	0	0	36	18	66	36	32	0	41	0	48	0	12	0	0	0	62	0	35	18				13	41	4	24	23	7	2	0	6	47	1	9	20	46	6
21	20	0	3	0	32	0	0	0	10	0	0	0	0	2	14	37	30	45	7	18	2	28	0	25	9	39	0	11	0	6	3				11	76	16	16	2	9	0	33	59	32	2	4	16	48	30
0	9	0	0	0	12	0	6	1	0	0	0	0	0	0	5	16	26	4	9	4	0	3	0	36	3	0	0	10	0	0	7				1	9	21	12	5	12	0	3	0	2	1	17	18	40	50
38	21	0	9	0	28	0	0	6	27	0	26	0	0	9	0	10	5	0	5	9	0	13	0	8	10	0	0	0	0	0	4				1	52	10	1	1	20	95	19	63	72	3	0	11	13	27
0	2	0	0	0	0	0	0	2	6	0	0	0	16	8	3	0	20	0	0	16	0	26	0	0	10	0	20	19	0	10	11				2	33	28	22	13	8	15	2	13	2	3	5	12	26	40
0	0	0	8	0	9	0	0	7	23	0	0	0	5	0	0	10	0	0	2	0	0	10	4	3	0	0	0	5	0	35	0				4	11	52	8	1	39	15	19	13	12	25	28	7	54	8
15	18	0	4	4	7	0	2	14	7	0	0	0	6	0	6	20	9	0	0	80	10	20	2	3	4	6	42	14	0	0	0				24	150	37	7	22	40	13	0	8	15	89	67	14	23	37
0	31	0	2	0	18	0	11	6	11	0	0	0	0	13	0	28	0	0	0	7	17	38	2	0	6	0	13	0	63	44	6				0	51	21	13	30	29	0	30	0	8	34	4	7	35	10
16	3	0	0	11	0	15	0	0	0	0	0	0	1	1	11	3	31	0	10	6	4	18	0	20	6	0	0	6	7	19	17				0	85	0	10	0	7	20	42	16	41	79	77	17	71	30
7	43	0	0	0	0	6	12	22	0	0	0	8	5	11	2	26	0	0	12	17	2	53	0	13	4	32	9	24	0	12	9				20	18	4	3	24	19	70	12	13	36	4	10	6	38	33
34	0	0	5	0	5	3	0	40	0	0	0	0	0	55	0	22	30	0	1	11	26	60	3	38	11	27	15	12	0	0	2				1	45	58	5	0	19	1	10	22	31	1	0	6	38	27
0	56	0	1	6	7	17	0	0	16	0	0	0	6	0	10	17	16	6	2	2	0	36	0	13	36	0	0	20	7	16	7				64	105	19	17	6	25	3	3	1	8	1	0	15	29	72
32	0	0	73	55	22	28	0	2	11	3	11	0	13	0	0	19	0	1	0	7	6	0	2	6	14	1	0	83	90	3	29				22	31	7	15	5	4	25	10	4	49	24	0	14	3	0
14	23	0	9	0	9	21	0	17	12	0	0	0	0	0	10	6	57	8	2	6	1	43	0	28	50	0	20	33	45	0	4				0	40	46	3	0	35	2	22	4	35	2	0	8	6	2
7	28	0	10	0	0	1	10	0	7	1	0	0	8	41	0	24	2	0	11	5	5	33	14	0	4	39	64	51	16	0	12				8	108	4	21	46	2	0	1	38	14	0	0	4	27	16
4	0	0	0	13	24	0	34	16	20	0	0	0	5	6	17	0	0	13	0	29	3	35	0	0	23	40	5	74	0	0	13				4	34	6	8	0	19	0	15	3	0	0	0	5	2	30
0	56	0	0	0	18	17	0	0	0	0	0	0	18	0	20	22	35	27	5	64	22	61	3	7	0	66	0	72	0	25	0				53	1	0	2	0	0	0	11	2	69	1	0	2	12	23
35	44	0	0	0	4	12	0	32	0	2	0	35	0	0	0	11	0	16	30	33	0	43	0	53	0	28	9	48	50	35	18				0	46	0	17	0	41	1	0	52	3	1	0	5	8	15
2	0	0	0	21	71	7	0	22	7	0	0	0	12	0	18	0	24	0	16	35	0	12	0	14	0	28	6	59	38	0	2				0	26	4	29	9	2	6	0	33	3	2	4	5	66	18
9	55	0	0	70	19	4	12	20	26	0	0	2	0	48	0	30	24	16	0	29	9	0	0	8	0	50	0	59	49	0	4				3	67	13	14	6	5	0	16	3	37	0	6	3	9	7
8	42	0	48	50	10	2	31	43	2	37	14	6	13	37	10	21	24	54	0	47	0	36	5	43	38	33	0	54	73	53	25				4	1	0	8	0	0	0	9	0	1	0	3	1	38	0
51	100	0	77	70	58	70	69	89	64	69	51	70	75	67	80	84	92	56	70	78	86	93	49	85	88	73	83	92	65	57	87				18	0	26	17	31	12	28	18	29	47	13	4	26	97	21
54	76	0	63	64	39	90	54	95	50	53	50	42	48	57	69	88	92	46	57	78	82	95	59	67	82	74	59	70	53	65	71				22	13	16	22	17	7	23	52	35	34	5	8	11	94	10
38	77	0	69	66	64	57	52	85	43	48	47	75	62	45	48	67	88	39	48	75	77	79	57	45	83	62	64	68	49	71	71				37	0	7	69	15	10	24	23	32	29	36	17	9	95	27
33	72	0	57	41	50	52	46	66	43	73	33	39	73	37	66	51	66	58	46	67	62	86	45	52	77	71	62	79	53	53	60				2	7	6	27	30	27	50	37	10	14	31	22	6	97	23
33	57	0	62	69	52	74	41	77	29	51	41	12	79	37	54	55	62	44	49	67	57	85	71	36	79	54	44	73	57	60	62				33	2	7	12	8	10	10	38	39	56	2	8	27	117	7
21	38	0	45	52	35	47	54	44	30	38	36	10	18	29	49	13	57	95	36	56	50	82	83	33	58	51	57	89	29	57	56				4	13	12	30	46	9	10	78	21	33	14	7	8	145	30
19	17	0	56	31	27	13	43	49	2	33	33	9	45	10	19	20	54	28	34	50	50	72	34	15	54	13	3	66	22	50	46				19	25	39	31	37	7	1	89	110	60	1	6	14	87	20
19	8	0	35	5	46	1	8	34	0	30	19	0	1	5	5	23	43	26	38	46	33	72	55	39	36	57	22	49	20	54	55				29	1	35	54	4	10	66	49	108	16	1	15	16	89	23
22	0	0	26	3	81	0	11	30	6	11	1	0	1	3	8	27	26	0	38	31	12	57	52	27	22	33	41	35	36	32	42				2	16	20	20	38	22	1	50	61	23	91	60	75	79	53
0	0	0	14	53	29	0	0	76	11	0	22	0	12	36	1	38	7	0	41	38	16	47	48	54	11	2	1	22	13	29	23				27	6	12	3	51	39	25	118	199	35	1	31	34	92	44
1	1	0	0	10	101	16	0	30	10	17	6	0	0	0	6	5	0	34	33	24	4	48	9	8	13	0	0	0	1	25	13				21	35	41	10	34	0	3	3	151	58	7	20	57	91	11
5	1	0	0	0	31	3	0	15	0	1	0	2	19	3	0	3	11	3	0	4	3	17	0	9	30	0	4	2	22	6	48				166	0	2	6	6	35	2	163	149	63	112	3	9	120	38
9	0	0	44	0	25	1	0	31	0	12	0	23	8	1	16	2	3	0	0	9	0	13	0	4	3	22	0	8	1	1	11				9	6	87	57	9	13	24	68	56	33	0	23	31	91	12
0	0	0	15	9	40	1	0	0	3	4	0	2	37	0	8	5	0	19	0	0	1	4	0	16	17	2	6	4	1	0	11				22	4	7	53	12	5	0	14	1	40	0	54	21	106	16
25	34	0	7	7	77	1	0	23	5	8	0	0	5	1	51	30	0	25	0	6	22	19	0	0	6	27	20	0	2	0	4				130	3	37	17	45	0	4	10	4	108	2	75	46	94	97
13	0	0	0	18	23	12	0	37	33	0	0	0	12	19	0	5	3	0	0	19	0	24	0	0	34	0	3	3	30	3	3				79	11	31	9	43	0	2	40	0	46	0	38	11	132	0
0	0	0	24	13	18	64	0	20	2	0	0	0	5	15	13	10	3	6	0	12	2	2	0	0	13	14	15	3	0	7	0				151	11	61	53	2	0	16	82	0	25	0	52	1	90	0
0	0	0	15	3	18	0	2	0	0	25	1	0	1	0	23	6	8	1	0	25	0	1	0	23	35	6	6	30	1	0	1				37	0	0	11	41	0	31	0	0	1	65	38	14	107	56
26	0	0	2	0	34	0	22	0	0	1	0	1	0	19	1	0	14	11	0	15	11	37	1	43	22	1	20	0	33	2	2				121	14	110	15	44	0	0	0	0	158	37	50	45	88	1
1	30	0	15	14	30	0	1	22	0	0	0	0	14	1	7	0	18	3	27	20	10	3	0	11	41	0	7	0	28	33	29				43	8	15	7	20	0	1	0	0	2	61	1	4	113	17
21	16	0	10	14	33	12	8	74	11	15	0	0	0	24	45	0	14	2	4	43	13	25	17	18	36	2	31	41	30	46	26				0	0	44	64	27	0	64	0	0	0	231	35	40	111	69
30	29	0	50	42	76	36	0	28	15	27	0	0	0	31	16	11	3	51	65	22	39	29	78	29	39	48	46	51	43	36	29				109	0	0	15	28	0	127	0	0	0	9	53	34	85	31
12	10	0	25	37	56	52	11	49	22	6	16	0	7	6	23	12	13	31	15	29	43	17	17	32	60	31	50	60	53	29	35				31	68	10	7	30	0	76	0	0	0	6	64	15	109	11
18	53	0	42	49	58	53	23	48	24	32	20	0	108	30	36	76	53	40	49	63	61	46	33	47	91	84	48	51	52	39	56				5	0	47	41	1	0	1	0	0	0	178	69	8	103	80
47	90	0	89	82	76	42	79	88	64	55	68	21	58	83	87	49	97	78	73	90	122	95	74	58	130	82	94	89	89	94	110				2	24	74	41	35	0	3	0	0	0	9	32	22	22	61
50	82	0	97	68	49	63	73	72	24	32	60	1	37	72	88	106	93	62	57	94	105	86	69	54	125	70	84	91	64	76	109				0	19	32	24	33	0	2	0	0	0	7	55	20	20	20
45	49	0	60	35	60	29	64	1	0	10	16	10	18	42	45	31	66	78	54	76	66	91	38	48	96	80	54	78	8	70	77				6	42	37	48	7	0	0	0	7	0	4	2	10	24	3
48	16	0	5	39	58	0	32	5	0	5	4	0	0	19	6	26	16	35	26	70	26	71	16	19	31	1	4	81	4	67	26				17	24	37	15	33	0	0	0	0	0	1	5	10	22	0
25	31	0	5	0	66	0	70	55	0	0	0	0	0	27	15	35	13	23	0	37	0	58	5	2	8	0	4	34	0	60	8				33	31	19	22	29	0	9	0	0	0	0	13	8	50	6
7	18	0	11	0	55	0	23	57	0	3	0	0	11	6	0	10	8	26	10	18	0	33	0	8	3	0	0	43	24	33	4				9	17	25	9	4	0	25	0	3	0	1	1	25	16	15
19	0	0	12	0	17	0	4	3	0	3	0	0	0	34	15	15	12	8	5	14	4	50	0	2	1	0	16	26	15	24	5				2	27	21	11	2	0	2	0	0	0	9	5	7	18	10
20	27	0	13	0	21	0	6	0	2	6	0	0	15	6	0	0	3	0	5	33	37	43	2	9	2	17	4	31	0	2	4				10	36	44	5	13	0	3	0	0	0	5	13	16	35	25
15	14	0	0	0	5	1	16	16	26	16	0	0	0	13	0	19	0	0	3	2	3	14	18	3	23	2	0	6	0	18	8				1	63	67	9	11	0	9	0	0	0	6	2	42	14	17
6	26	0	12	0	0	0	21	7	4	0	6	7	2	25	0	3	0	0	8	9	4	43	6	0	7	43	13	12	31	3	0				12	26	46	34	5	0	0	0	0	0	1	4	15	48	45
21	28	0	0	0	0	4	0	15	0	4	0	0	12	2	19	46	38	0	6	6	4	21	6	0	0	2	4	4	3	19	0				0	21	38	9	9	0	16	0	0	0	7	8	11	10	14
0	14	0	0	45	6	3	7	9	7	16	0	0	1	0	13	6	14	3	12	0	0	25	0	20	19	0	22	24	10	16	0				0	19	38	11	5	0	2	0	0	0	0	7	34	38	7
12	0	0	11	5	19	113	0	4	0	0	7	0	0	40	4	7	0	6	8	11	10	48	19	33	0	0	6	10	0	8	0				1	14	63	11	0	0	5	0	0	0	0	1	24	21	2
24	24	0	19	36	3	3	24	15	10	6	1	0	0	2	0	19	0	6	7	3	7	37	8	5	1	51	9	0	0	16	0				3	12	35	6	6	0	36	0	0	0	1	12	9	33	9
8	0	0	0	0	0	1	18	0	9	8	11	0	21	19	0	9	20	0	0	0	7	29	0	9	13	19	9	18	38	27	0				4	26	4	7	5	0	2	0	0	0	8	67	6	19	5
0	50	0	30	39	8	6	30	9	26	0	0	0	0	0	10	0	1	0	0	11	28	25	0	0	2	26	26	7	29	24	0				1	66	21	12	3	0	7	0	0	0	0	9	2	1	1
29	0	0	0	42	18	5	0	4	2	2	0	0	0	37	22	0	30	4	6	21	29	45	10	7	15	15	0	39	16	48	7				1	23	45	7	8	0	10	0	0	0	2	0	17	26	5
0	20	0	0	28	0	1	0	6	0	0	0	6	0	0	0	16	0	24	0	10	7	65	11	8	13	0	0	58	16	3	45				2	33	15	8	0	0	109	0	0	0	0	4	20	3	14
5	42	0	28	0	19	6	14	8	0	8	14	15	0	31	20	37	36	0	30	14	0	59	2	10	57	53	50	51	33	0	28				0	45	46	11	0	0	2	0	0	0	0	0	0	43	0
31	6	0	2	2	5	0	20	2	0	25	0	5	13	19	8	12	12	9	58	12	7	34	9	16	0	78	57	12	4	37	37				0	42	5	17	0	0	0	0	0	0	0	12	0	2	0
11	50	0	0	1	23	5	0	79	0	1	10	13	0	0	0	18	17	56	24	24	0	34	19	0	27	40	11	59	16	0	0				0	39	16	26	0	0	0	0	0	0	0	19	0	2	1
0	26	0	5	33	30	12	8	23	21	3	0	0	0	18	0	0	12	54	17	43	4	7	7	18	14	48	5	42	26	0	32				0	8	0	9	11	0	0	0	0	0	1	6	0	23	0
0	44	0	12	18	38	0	0	17	9	12	8	0	18	20	8	41	4	21	7	30	5	20	20	0	68	41	7	46	26	36	30				1	17	2	29	0	0	0	0	0	0	3	0	37	30	60
12	41	0	44	147	15	11	40	2	12	0	9	5	0	32	27	39	29	33	29	44	18	47	31	23	88	64	10	65	38	53	33				0	4	10	3	0	0	0	0	0	0	5	5	24	4	57
Daily crossings
DMSO	100 μM amitraz	1 mM amitraz
7.99	17.51	18.66
14.43	15.34	15.64
9.52	21.58	10.06
11.57	11.37	15.58
17.03	7.66	15.12
8.66	9.46	15.36
8.6	9.36	15.78
17.39	18.07	16.09
7.16	12.45	12.12
7.33	16.33	17.28
7.32	8.21	30.99
4.57	9.57	17.59
7.58	6.59	27.42
8.82	32.76	15.11
10.74	11.21	17.16
18.05	10.78	13.1
13.95	25.86	4.49
10.25	14.74	12.77
8.75	15.55	15.4
19.7	13.05	10.59
11.79	12.01	15.81
11.96	27.29	12.75
12.99	18.99	18.15
14.5	23.98	13.18
15.12	9.09	9.31
13.09	16.66	17.11
13.99	11.69	15.49
11.66	30.82	26.15
10.04	12.22	4.71
8.86	9.21	9.4
13.17	14.12	7.57
12.08	10.34	13.74
12.9	8.38	7.32
16.92	8.31	17.77
9.6	9.32	16.48
9.94	10.15	21.02
15.19	8.81	17.45
6.19	9.73	20.14
7.69	10.35	5.95
5.9	9.21	17.16
3.68	29.56	14.65
8.36	10.74	15.82
10.23	8.55	3.74
10.31	22.52	11.7
11.75	15.55	22.67
12.51	13.08	14.5
11.44	7.44	7.84
10.95	6.79	14.61
15.49	20.76
12.27	20.64
10.78	7.83
10.45	19.96
17.73	10.51
14.59	26.03
11.81
18.22
11.84
14.89
14.04
[truncated: 41 more columns]

## Sheet: Figure 3D
Figure 3D octβ3RMB04794
Crossings per 30 min
DMSO																																		100 um Amitraz
23	0	5	25	4	10	0	14	16	25	8	25	0	8	22	0	21	11	0	10	19	81	2	15	4	0	9	15	38	28	8				87	51	118	65	121	66	118	107	67	71	63	63	68	79	80	63
16	0	9	11	2	0	0	0	13	55	0	43	0	4	133	0	0	82	0	8	4	10	8	15	1	3	5	8	29	28	2				48	2	101	53	118	22	49	10	11	51	54	32	57	23	79	49
3	0	1	26	0	2	0	0	6	5	1	1	0	0	20	5	0	0	15	0	7	0	40	56	11	0	4	10	6	0	0				44	4	63	53	79	28	3	5	6	27	8	15	29	11	60	34
11	0	19	9	0	0	0	0	0	3	0	83	12	0	3	27	0	9	0	0	8	0	11	23	6	1	0	24	7	0	14				24	11	0	55	35	0	0	0	5	49	10	3	27	0	66	34
14	0	28	38	0	86	2	2	30	43	4	7	0	19	0	9	0	19	41	0	4	9	57	0	4	0	0	20	5	2	0				32	32	4	50	0	0	33	13	9	21	0	23	14	0	81	33
0	0	7	71	0	0	1	4	6	58	4	10	0	0	9	0	0	8	189	0	2	28	6	16	11	0	0	6	18	0	0				40	11	0	53	0	0	42	38	21	26	0	8	15	18	27	17
8	3	8	6	0	0	5	0	6	24	0	7	0	6	23	12	0	43	0	0	15	5	5	1	12	0	7	2	4	2	0				39	17	0	58	0	0	3	45	0	23	41	8	48	21	26	27
28	62	12	16	0	1	60	0	9	4	14	45	0	46	2	3	0	36	0	0	0	3	3	1	22	0	13	6	10	43	0				13	11	57	49	0	0	7	57	17	11	9	8	7	0	10	37
6	22	65	17	0	0	1	0	61	24	1	2	0	0	0	5	1	4	0	0	47	5	19	6	1	0	0	0	1	3	0				32	23	52	47	0	0	1	4	0	38	0	13	26	18	20	33
0	0	7	12	46	0	21	7	7	6	0	1	2	9	0	0	37	17	0	0	10	0	13	4	5	0	0	0	1	7	0				35	3	79	60	0	0	0	13	22	20	55	10	22	6	39	21
0	0	0	43	0	0	6	36	13	32	0	15	142	21	0	0	20	100	0	0	17	0	0	59	1	0	0	0	0	0	33				16	4	64	53	0	0	0	42	0	43	0	11	5	15	50	26
0	0	0	0	0	34	3	22	0	1	0	31	0	0	13	0	49	2	0	0	0	0	1	16	26	0	0	0	0	0	0				27	14	5	50	0	0	0	0	13	16	0	8	27	0	27	28
0	0	3	82	0	0	51	0	28	12	0	7	0	23	1	0	0	0	0	0	0	1	8	163	3	0	0	0	0	0	9				22	2	3	52	0	0	0	42	0	39	0	5	28	0	59	25
0	0	0	26	0	4	47	0	0	25	0	0	64	50	0	0	0	19	3	0	0	5	19	62	0	0	0	3	5	15	4				35	0	21	62	0	0	0	1	32	32	0	0	7	0	13	28
0	0	0	23	0	0	31	0	8	7	0	7	0	100	0	0	0	15	18	0	14	52	0	0	37	1	0	0	5	0	0				37	6	50	51	0	0	6	14	0	17	0	31	8	1	26	27
0	0	0	52	0	0	42	36	88	84	0	5	11	0	0	0	5	0	0	0	29	60	6	24	1	1	5	0	0	1	4				28	11	26	36	0	0	80	24	9	30	0	36	17	0	31	33
0	15	0	24	0	0	40	2	121	7	0	0	0	23	0	0	36	5	80	0	0	22	0	1	11	0	0	0	0	41	0				29	0	61	43	0	0	18	21	1	36	4	14	18	0	24	20
0	0	0	15	0	0	0	7	20	15	0	35	0	80	0	0	0	7	12	0	0	2	0	0	0	0	0	5	0	0	0				27	18	55	52	0	0	2	24	20	27	0	9	15	0	58	45
0	7	0	8	0	0	7	0	5	27	6	24	0	0	0	0	0	1	0	0	0	0	11	35	0	0	0	0	0	0	0				22	0	20	49	0	0	1	7	0	27	0	0	14	0	55	22
0	0	0	13	0	0	23	0	5	4	5	6	0	0	0	0	0	15	0	0	0	48	0	0	3	0	0	0	0	1	0				16	5	31	48	0	30	0	0	5	19	0	0	14	0	94	23
0	0	32	4	0	0	27	0	0	0	0	12	0	5	0	0	0	8	0	0	0	0	10	0	22	0	0	0	9	8	64				2	4	51	47	0	19	0	0	17	0	0	0	0	0	57	23
0	0	38	0	0	3	19	0	25	36	0	47	0	34	0	0	1	9	2	0	0	1	7	6	1	0	0	0	0	0	0				36	2	37	28	0	0	4	25	8	2	5	46	0	21	2	11
0	0	20	0	0	0	1	0	1	14	0	8	0	16	0	0	16	1	0	0	0	21	0	6	0	0	0	5	1	54	0				8	19	33	36	0	0	10	5	1	23	0	23	2	0	19	0
0	0	0	2	0	0	0	0	0	5	0	4	0	0	1	0	0	0	0	0	14	50	5	0	14	0	0	0	0	0	0				15	20	53	42	32	0	6	13	15	50	8	12	2	0	45	13
12	89	66	37	3	20	0	3	30	63	22	40	0	4	20	4	58	27	24	17	10	89	24	33	83	19	31	25	26	9	22				34	47	112	29	58	53	41	75	29	47	63	56	59	93	179	60
40	31	17	38	55	15	70	0	20	76	18	28	0	21	6	0	1	35	34	18	2	53	6	18	23	33	42	1	15	0	23				37	70	78	29	30	24	14	64	25	40	19	37	44	81	153	56
5	0	6	21	12	14	13	5	31	93	7	76	0	0	13	5	48	0	0	24	76	24	27	61	1	34	33	67	5	6	1				36	49	72	54	56	23	1	27	97	34	9	24	25	76	149	46
68	3	36	22	11	3	2	1	17	51	3	3	0	10	22	23	92	17	65	25	29	0	27	69	138	56	88	24	19	5	0				21	76	52	31	45	17	15	53	6	15	1	26	34	39	130	46
14	25	62	27	12	42	0	16	23	43	3	35	0	13	41	9	48	10	18	24	7	46	70	26	66	49	22	39	12	43	0				25	30	35	14	45	27	6	29	12	19	1	17	55	39	134	28
9	1	67	24	13	19	60	16	4	30	84	88	2	11	17	16	0	33	33	17	27	4	38	28	37	78	29	3	38	2	0				12	54	59	25	45	17	18	35	25	19	9	25	16	17	113	29
44	0	30	33	2	24	4	28	14	18	147	20	0	12	47	0	1	21	56	116	38	3	38	94	24	48	39	18	34	37	0				27	38	16	20	59	30	60	29	18	9	31	27	47	77	34	23
7	22	45	63	4	25	11	36	10	88	146	51	0	7	37	0	81	65	5	5	19	57	53	14	19	18	41	9	5	14	0				19	26	7	22	32	9	15	14	0	16	36	12	32	15	8	24
5	0	36	59	0	43	16	15	8	26	9	15	0	1	28	0	2	17	15	14	21	85	59	24	3	58	68	30	48	0	0				12	24	20	13	34	0	17	12	10	19	14	32	21	7	39	11
49	10	25	58	0	0	37	0	14	111	123	37	90	15	0	16	0	2	16	23	8	78	3	47	52	10	12	13	9	10	0				0	14	10	11	36	6	3	8	17	17	22	28	17	8	18	14
8	5	17	45	6	7	2	0	69	30	45	6	0	0	20	1	88	26	8	10	21	34	32	24	100	7	0	56	12	0	0				42	15	25	14	26	30	38	40	0	11	2	10	5	22	15	22
29	12	31	62	3	0	15	108	98	5	32	23	0	34	15	5	50	17	0	2	24	8	60	0	7	41	27	0	14	60	0				17	23	39	11	23	3	7	8	10	33	25	23	10	37	14	11
12	4	14	101	19	0	0	29	29	14	113	0	0	42	30	0	107	0	6	11	19	110	21	66	36	1	20	19	14	8	0				19	19	9	8	3	4	11	8	0	8	33	13	1	17	6	24
39	29	6	6	1	0	95	30	29	70	65	44	0	5	0	0	9	23	31	0	14	30	8	98	30	98	74	8	11	65	0				28	12	32	10	16	6	11	6	5	10	9	20	7	10	48	9
78	33	2	24	24	0	5	1	25	55	90	36	0	31	0	0	10	48	0	19	7	28	3	115	2	6	80	12	9	0	0				11	2	16	10	0	34	7	10	27	9	7	4	7	15	4	4
1	0	4	52	3	1	31	14	26	15	64	5	1	64	0	0	71	8	33	0	23	35	2	0	1	30	78	40	32	3	0				2	29	33	19	25	3	19	8	0	6	53	5	16	0	29	4
19	15	2	28	45	94	0	2	8	19	73	78	185	18	1	0	16	16	42	17	13	29	0	10	0	0	1	8	5	4	0				20	2	23	7	3	0	5	11	0	20	6	16	2	6	22	4
0	0	0	0	6	10	33	0	18	45	119	55	29	28	5	1	0	11	0	3	5	0	34	133	0	42	3	59	0	0	0				15	7	11	8	6	15	6	8	2	13	20	8	14	3	19	10
0	1	33	6	0	0	0	2	47	25	14	2	10	38	58	60	6	0	6	0	44	34	25	103	32	9	166	18	1	9	0				25	18	19	78	0	7	0	15	13	16	6	8	9	0	38	1
5	4	6	38	16	0	114	8	181	12	105	47	3	34	41	41	86	46	29	10	31	0	37	21	0	0	5	0	2	0	0				2	7	33	47	9	14	16	8	16	4	11	12	2	0	38	2
6	40	8	45	0	0	56	4	2	20	44	3	62	33	0	1	0	0	8	53	2	23	4	15	0	12	45	0	0	3	0				0	11	19	52	23	17	4	11	14	5	6	1	16	3	35	6
8	1	0	6	11	0	0	0	21	3	76	77	0	47	2	18	4	3	27	0	3	3	54	30	0	4	62	3	3	54	0				25	44	53	38	45	8	62	41	26	44	13	4	14	31	64	37
0	97	21	3	88	0	13	0	12	31	94	8	0	40	1	4	11	49	0	5	30	0	0	48	33	34	1	11	0	12	0				39	48	51	44	65	27	55	59	54	59	26	39	30	68	99	50
42	0	4	25	23	0	46	21	105	22	65	29	1	31	0	1	94	17	2	0	35	9	1	54	8	4	0	24	0	39	0				45	57	84	47	91	43	56	62	50	72	39	52	40	89	158	57
0	14	19	74	17	11	9	17	4	15	24	74	83	33	33	6	19	46	21	61	15	37	9	26	31	6	59	11	23	68	0				97	49	121	95	120	53	125	110	72	109	74	106	97	81	127	77
4	0	3	95	9	7	4	16	6	36	74	40	0	63	46	0	1	81	14	42	0	75	0	35	28	16	4	36	2	58	0				33	36	42	63	115	0	34	35	64	47	45	79	68	9	105	31
9	0	5	36	0	4	2	4	20	4	0	3	0	40	15	3	27	10	6	34	26	15	14	15	1	24	0	7	9	0	0				0	11	1	22	101	6	80	3	22	0	6	36	64	0	75	0
9	9	19	76	17	30	4	3	31	31	11	31	1	55	19	6	13	49	0	35	47	9	33	14	2	41	33	33	0	40	0				36	11	0	0	39	0	13	20	2	0	17	0	62	0	54	0
10	1	12	33	5	12	4	3	62	5	33	15	84	0	25	5	29	47	0	11	19	23	8	12	24	65	6	35	2	10	0				24	29	0	0	51	0	18	23	0	11	42	0	2	6	32	0
9	0	24	49	23	3	16	0	13	16	50	13	0	31	4	6	3	34	3	32	8	10	54	65	19	35	53	27	9	31	0				30	27	0	0	33	0	4	16	0	2	3	2	10	3	34	0
15	1	33	60	4	16	12	25	8	18	48	37	2	6	31	0	6	24	0	23	110	20	7	18	33	7	30	47	7	1	0				7	18	0	2	24	0	37	17	0	0	28	7	34	0	45	0
18	37	12	112	2	52	4	0	21	86	24	8	9	1	80	18	2	45	2	20	23	24	7	13	36	27	14	17	22	1	0				41	15	0	0	0	0	0	8	0	0	9	0	18	0	36	0
8	54	13	46	20	11	10	6	0	11	30	3	0	1	12	11	7	68	3	29	8	27	7	42	8	59	4	11	34	7	0				23	17	0	2	0	0	27	7	18	0	6	0	26	0	33	0
0	4	17	22	4	14	12	8	17	41	11	1	0	15	40	4	0	23	1	65	30	24	22	8	20	80	25	40	26	0	0				36	7	0	8	0	17	10	14	17	0	0	12	16	0	23	14
7	0	18	50	0	13	33	0	31	7	1	8	26	10	3	0	6	38	4	17	10	21	33	10	33	2	8	29	2	0	0				3	16	16	2	0	16	51	25	2	4	15	15	14	0	33	1
1	28	27	67	0	4	54	20	0	35	22	5	110	17	23	49	13	51	0	28	72	40	5	25	24	0	1	49	19	0	0				40	28	0	32	0	0	75	23	0	0	8	18	10	0	4	0
0	2	7	26	4	2	13	0	18	12	0	13	0	18	28	2	8	67	0	33	12	13	90	7	3	13	0	23	1	0	0				22	36	30	41	0	0	23	15	31	7	7	8	0	0	20	0
0	5	9	17	2	4	35	0	1	9	0	18	42	40	5	13	16	45	0	39	6	33	1	44	10	18	0	5	7	0	0				30	13	7	35	0	5	16	33	14	8	0	36	19	0	30	0
0	1	9	86	0	8	30	32	9	12	0	32	0	17	26	0	0	49	15	32	118	9	34	67	13	0	0	6	6	0	0				0	31	4	33	0	43	11	27	4	10	32	13	17	0	12	0
3	0	9	17	0	25	29	6	19	83	0	6	40	0	22	28	1	34	0	34	38	21	35	15	72	0	1	17	0	0	0				0	28	16	34	4	0	60	13	0	16	6	18	10	12	13	0
0	4	1	58	6	1	0	2	10	0	0	6	26	0	2	0	5	29	1	34	12	0	4	65	9	0	81	33	1	0	0				17	20	0	29	8	0	22	10	45	37	16	25	10	0	8	13
0	30	1	21	0	10	11	0	0	17	0	77	35	19	28	36	75	21	2	36	0	2	0	8	0	3	1	5	3	0	0				58	26	0	50	41	8	37	15	0	23	0	18	5	8	19	27
0	5	5	46	0	19	18	32	0	81	0	1	0	16	0	0	5	70	0	61	0	0	2	14	12	0	14	14	10	0	0				15	20	14	27	52	0	5	18	31	21	10	8	12	9	7	31
0	0	6	33	0	0	8	0	2	0	0	50	0	1	2	0	37	17	0	0	72	2	12	1	15	4	12	6	5	1	0				37	5	22	23	58	4	27	6	0	8	7	10	0	0	5	27
0	0	0	34	0	0	0	9	49	11	7	0	0	1	2	6	0	20	0	16	1	1	7	15	1	0	35	3	0	3	0				10	8	4	20	34	22	0	6	0	0	23	8	11	0	6	13
0	0	10	43	0	3	21	0	5	0	11	8	0	6	0	0	0	8	13	1	0	15	0	21	0	0	0	26	0	14	0				30	5	0	12	32	0	5	28	0	14	0	0	2	3	4	20
0	0	1	15	0	0	14	43	1	8	50	6	47	0	3	10	3	17	0	5	0	45	20	90	18	0	40	41	0	0	0				56	7	0	6	30	0	6	6	12	15	22	0	28	9	6	41
0	0	19	25	0	0	2	0	32	7	147	28	0	46	9	4	9	12	0	6	0	97	29	27	26	0	4	37	0	0	0				33	34	18	0	63	11	16	65	0	21	6	23	0	0	25	31
74	1	23	29	11	29	15	51	28	21	9	37	41	14	22	0	47	23	9	31	24	16	16	24	54	26	34	24	27	20	0				81	49	56	46	82	50	81	82	49	57	43	66	73	50	166	54
2	0	17	45	18	22	0	6	43	101	3	54	0	40	14	8	57	18	34	32	13	43	28	51	12	73	54	10	25	3	0				42	44	73	41	81	27	56	63	66	40	45	51	37	64	155	55
24	2	41	38	29	24	24	47	37	51	12	27	0	52	34	0	2	29	25	17	16	4	23	10	6	29	11	6	34	37	0				33	50	44	34	58	17	56	46	38	36	44	41	36	34	147	58
10	4	48	54	24	19	31	9	7	38	92	35	45	20	39	0	50	15	6	62	68	27	3	33	20	68	35	27	49	0	0				25	29	37	29	56	20	35	52	26	27	36	37	20	26	143	34
27	31	27	49	17	20	12	116	49	22	22	1	86	8	24	3	12	28	59	13	16	22	43	64	13	47	37	42	16	34	0				40	36	36	30	60	15	42	58	36	39	44	41	32	39	144	49
0	0	11	33	15	35	28	6	36	23	74	39	64	48	17	0	114	13	13	58	14	91	0	49	48	30	109	79	11	4	0				25	24	10	26	49	9	47	42	26	37	28	45	23	32	132	56
6	17	23	85	9	25	37	32	65	49	12	68	23	17	11	6	62	18	18	23	18	40	47	32	13	11	23	51	17	14	0				23	25	18	21	60	18	40	37	16	28	33	48	13	5	128	37
84	0	14	73	2	20	3	14	14	30	19	21	18	9	4	3	80	29	89	51	19	23	10	36	19	31	50	4	12	7	0				9	29	23	22	64	21	42	47	28	23	25	45	18	2	121	29
4	0	50	22	13	19	0	0	53	43	11	9	0	10	19	6	11	26	0	46	10	12	30	13	10	15	118	33	5	21	0				4	20	30	4	39	2	34	23	17	27	21	70	12	6	108	19
22	48	6	51	12	5	72	1	7	53	10	10	0	81	23	0	62	13	0	68	18	13	25	16	23	24	29	6	12	3	0				19	25	25	4	23	10	41	22	10	19	22	43	5	4	107	11
78	0	34	25	6	0	22	2	7	85	13	42	76	13	37	2	49	21	60	18	10	2	13	8	144	37	75	6	30	45	0				22	32	13	8	21	22	14	15	10	17	29	44	6	10	122	20
8	110	9	28	3	3	70	8	83	43	77	24	34	13	29	0	32	9	90	40	13	2	0	13	21	10	8	2	12	8	0				107	12	8	8	7	55	55	25	3	29	24	15	3	3	112	29
86	5	53	72	8	71	48	19	30	16	23	25	0	10	12	0	93	23	52	6	15	14	25	49	2	13	66	1	16	3	0				7	10	8	11	7	34	13	23	6	13	15	11	16	6	120	11
2	1	8	60	0	3	0	8	11	14	11	27	0	22	22	1	9	21	0	39	8	8	17	11	29	62	0	12	1	9	0				53	7	12	22	16	8	25	9	11	25	15	7	2	5	129	21
5	0	19	16	4	47	22	2	7	41	87	20	41	32	29	14	59	29	20	0	42	0	21	6	7	40	116	2	10	15	0				23	6	7	2	17	12	10	13	18	2	14	25	2	16	127	14
0	42	12	37	11	4	2	0	23	38	75	4	19	26	16	9	32	18	5	13	101	26	4	13	33	18	20	6	47	8	0				37	4	11	7	5	27	8	23	22	35	18	23	7	6	145	6
45	2	7	33	49	47	0	18	23	24	93	78	0	12	41	0	44	16	0	5	20	15	49	15	20	2	0	15	32	131	0				40	8	6	5	22	6	20	27	32	3	38	28	8	2	110	12
27	0	84	75	11	47	4	0	63	6	71	43	20	43	2	26	27	6	0	50	1	12	8	121	18	0	27	3	2	0	0				2	22	8	5	9	4	19	9	24	2	20	19	9	2	124	17
30	2	13	18	3	16	31	0	11	30	8	73	0	36	9	0	0	25	66	26	13	11	24	94	35	0	50	36	17	0	0				8	9	5	9	18	4	17	10	26	2	17	19	16	2	130	2
21	0	23	29	3	0	77	32	68	52	81	4	31	13	75	4	0	30	3	30	12	34	28	39	49	1	0	4	2	0	0				11	11	25	20	5	13	19	10	25	7	23	31	19	2	140	6
0	0	10	9	2	16	16	0	17	12	11	13	5	18	0	0	0	23	0	14	22	13	0	0	19	22	1	31	4	0	0				15	0	4	3	18	44	17	31	48	2	26	39	25	1	140	36
4	7	8	43	0	1	3	0	31	49	5	25	30	27	0	1	0	36	70	0	5	13	5	1	0	0	18	2	6	19	0				33	0	44	61	30	19	35	58	47	22	42	37	40	16	149	42
4	35	9	40	0	2	23	10	15	3	10	40	2	6	2	1	0	0	84	4	0	0	0	20	40	0	172	28	0	1	0				41	0	39	54	34	34	51	65	52	51	42	43	55	42	159	33
0	5	15	30	2	0	8	23	28	31	22	24	1	51	13	43	0	15	7	38	2	7	61	11	8	0	39	0	0	19	0				70	0	72	84	63	38	63	73	63	76	39	51	54	50	165	54
12	0	25	46	18	4	3	15	17	28	19	31	23	116	66	10	0	34	34	64	26	61	43	22	90	31	24	7	10	42	0				109	0	116	92	107	83	100	112	95	111	73	118	104	60	109	77
2	31	13	43	41	12	8	0	22	44	35	9	4	1	28	6	0	55	8	11	14	17	6	41	17	41	2	22	11	43	0				56	0	48	59	90	25	89	67	76	58	54	103	52	12	114	15
6	0	14	50	9	16	0	35	12	37	10	16	2	8	51	9	0	42	32	70	42	32	9	25	2	31	19	16	23	0	0				0	0	7	46	82	0	24	11	2	25	13	69	60	0	97	0
0	3	23	57	1	18	2	5	13	4	8	15	8	27	24	0	0	74	31	38	50	40	30	99	25	47	11	23	3	17	0				16	0	0	28	35	7	8	7	34	0	18	13	37	0	53	0
27	5	33	44	7	29	4	0	19	115	13	68	1	3	76	7	0	32	7	65	6	0	18	27	45	27	26	2	11	7	0				0	0	0	5	1	54	24	18	0	0	20	10	22	0	28	6
23	4	50	77	9	35	30	10	9	98	25	4	26	14	46	5	0	66	4	31	8	1	70	18	61	5	17	14	5	5	0				0	0	0	0	0	42	21	11	0	0	8	23	23	0	33	18
0	21	22	31	2	16	8	4	9	58	4	14	0	11	32	28	0	41	7	38	46	14	20	9	52	22	20	27	7	5	0				0	0	0	0	0	49	13	36	29	0	18	40	56	0	28	0
4	0	14	26	5	64	12	11	67	29	16	56	6	11	40	7	0	41	4	48	10	57	7	87	78	56	6	42	11	13	0				0	0	0	0	0	0	0	30	1	0	20	25	21	3	29	5
2	10	29	23	14	14	11	4	6	2	11	17	27	7	22	7	0	36	3	77	25	19	15	12	44	42	10	5	22	3	0				0	0	0	11	0	0	20	62	52	0	26	26	3	10	35	16
2	0	45	36	2	30	10	10	8	10	66	20	0	2	55	11	0	53	11	119	29	33	5	31	20	22	55	15	12	0	0				0	0	16	68	0	0	11	8	38	0	22	2	35	0	34	0
4	58	19	18	6	26	38	19	10	4	17	6	36	7	34	0	0	75	9	37	59	73	3	19	15	70	41	19	21	1	0				1	0	4	51	0	0	15	15	0	0	16	8	1	0	21	0
0	12	28	21	3	18	62	32	11	32	47	11	9	21	90	6	0	29	13	64	25	16	5	36	16	18	32	13	31	19	0				41	0	0	44	0	0	85	2	35	0	13	12	27	0	10	0
2	7	11	45	12	14	3	0	5	23	41	8	35	19	24	2	0	36	4	35	16	29	21	22	38	16	15	27	20	15	0				14	0	2	33	12	0	16	19	2	0	4	29	12	0	8	0
0	0	41	89	4	6	4	0	15	33	28	9	0	24	23	11	0	38	2	29	29	45	15	20	48	84	14	42	43	53	0				30	0	0	37	41	0	24	10	30	0	13	30	10	0	12	36
2	9	33	48	2	34	49	0	18	45	5	15	0	26	39	3	0	29	6	26	14	56	4	34	29	13	31	15	13	4	0				13	0	0	39	41	0	20	12	0	0	0	21	0	9	47	29
0	0	65	37	0	50	12	1	13	15	3	5	26	34	5	7	0	28	2	48	14	5	42	54	15	59	0	37	10	32	0				31	0	0	31	63	0	21	6	17	0	3	6	0	9	14	22
0	0	18	44	4	48	5	18	58	23	16	1	24	28	24	14	0	35	16	45	5	4	61	10	49	9	8	47	8	6	0				18	0	0	23	56	0	4	7	0	0	42	4	12	5	8	10
0	4	73	29	36	11	1	6	17	11	60	8	0	35	13	2	0	31	3	37	9	3	1	38	25	2	34	39	18	40	0				13	0	6	32	66	0	11	26	17	0	28	27	0	0	8	20
1	1	4	76	3	2	7	9	0	11	7	16	4	11	0	7	0	13	0	72	50	16	41	29	3	14	30	25	26	7	0				18	0	0	23	54	0	4	7	27	0	16	19	10	5	0	36
4	30	10	61	6	6	48	4	64	11	33	15	0	0	5	8	0	23	0	85	17	75	34	11	14	0	5	30	9	7	0				11	0	0	28	34	0	19	0	19	0	0	24	28	0	31	29
1	48	1	29	31	26	13	0	48	18	7	1	12	10	35	3	0	10	29	14	11	3	28	44	56	2	33	9	11	9	0				0	0	0	14	27	0	0	4	1	0	0	10	0	0	16	0
65	0	25	92	0	5	10	0	36	6	11	53	12	0	10	2	0	4	3	22	11	0	23	41	3	5	18	8	12	0	0				15	0	0	20	31	0	6	7	16	15	0	0	22	7	0	0
12	38	18	8	7	11	10	7	0	2	18	23	0	0	10	7	0	6	8	24	5	0	25	7	27	71	40	14	5	0	0				10	0	0	31	27	0	2	13	0	10	14	6	12	4	59	7
0	4	8	20	6	26	0	2	16	25	134	6	0	40	0	0	0	16	5	16	0	7	59	17	1	7	0	8	7	3	0				21	0	0	24	24	0	13	30	24	41	5	1	10	3	14	0
[truncated: 45 more columns]

## Sheet: Figure 3E
Figure 3E octα2Rattp
Crossings per 30 min
DMSO																				100 uM Amitraz																			1 mM Amitraz
50	23	17	12	20	36	36	49	27	36	19	102	71	30	30	59	7				63	78	12	23	32	29	51	44	54	46	71	60	8	21	93					20	40	43	11	15	118	38	57	20	12	11
46	0	0	0	50	55	33	33	15	32	14	0	59	3	0	7	5				13	69	0	9	8	66	0	51	9	30	100	45	0	0	28					1	43	11	0	44	50	6	28	0	30	29
26	5	0	0	7	49	0	0	0	27	2	1	74	0	0	0	19				8	24	0	12	0	14	0	14	0	6	60	67	4	16	6					11	31	19	6	8	66	0	21	0	27	15
0	5	0	0	0	0	0	0	0	0	2	0	57	0	0	20	6				12	8	0	1	0	0	0	0	2	25	74	3	0	0	21					5	36	27	18	18	58	0	67	0	6	15
0	9	0	0	0	0	0	0	10	0	0	6	0	0	0	0	4				0	17	0	11	0	0	0	0	22	0	35	0	0	20	8					0	47	36	1	0	79	0	44	0	8	11
0	2	0	0	0	0	1	0	0	0	0	0	2	0	0	8	0				0	0	0	7	0	0	0	0	0	0	1	0	0	53	1					0	32	46	17	0	0	0	39	0	11	4
0	0	0	0	0	0	6	0	0	0	0	12	0	0	0	0	0				0	0	0	16	0	0	0	0	23	0	8	0	0	7	4					0	59	0	30	0	76	0	29	0	0	9
0	0	0	0	0	0	5	0	0	1	0	0	0	0	0	0	0				6	0	0	29	0	0	0	0	0	0	0	32	0	0	0					0	48	18	6	4	8	0	43	5	7	11
0	0	0	0	0	0	7	0	0	0	0	44	0	0	0	11	1				0	0	0	6	0	0	0	0	0	0	27	11	0	0	0					0	39	0	1	0	41	0	23	0	29	18
0	0	0	0	0	0	27	0	0	27	0	0	0	0	0	8	8				29	45	0	11	0	0	0	0	0	0	42	14	0	0	2					0	91	7	31	0	11	0	39	0	7	4
0	0	0	0	0	0	0	0	0	5	0	0	0	0	0	14	1				11	0	0	1	0	0	0	0	0	0	0	3	0	0	26					0	67	0	11	0	69	0	35	0	4	3
0	0	3	0	0	0	5	0	0	0	0	0	0	0	0	7	1				3	0	0	0	0	0	0	0	0	0	0	0	0	0	64					0	21	13	0	0	51	0	19	0	17	10
0	0	1	0	0	0	0	0	0	0	0	0	0	0	0	31	2				0	0	4	6	7	0	0	0	0	0	0	0	0	0	40					0	21	5	0	0	84	0	38	0	23	9
0	0	0	0	0	0	0	0	0	0	0	0	0	0	0	37	2				26	0	0	11	0	0	0	0	0	0	0	0	0	0	0					0	23	63	20	0	141	0	71	0	5	24
0	0	0	0	0	0	1	0	0	0	0	1	0	0	0	14	1				0	26	0	6	0	0	0	0	0	0	3	0	0	0	0					0	8	18	0	0	40	0	23	0	5	11
0	0	14	0	0	0	0	0	0	0	0	0	0	0	0	12	1				0	31	0	7	4	0	0	0	0	0	63	0	0	0	0					0	46	4	0	0	58	6	26	0	0	3
0	0	0	0	0	0	0	0	0	0	0	0	0	0	0	17	0				14	0	0	0	1	0	0	0	0	0	62	0	27	0	10					0	24	13	0	0	30	18	43	0	0	11
0	0	15	0	0	0	0	0	0	0	0	0	0	0	0	22	0				3	0	0	2	6	0	0	0	8	0	7	0	34	3	33					0	107	2	0	0	98	14	24	9	22	4
0	0	0	0	0	0	0	0	0	0	0	0	0	0	0	17	1				0	0	0	18	5	0	24	0	0	0	6	7	27	0	55					0	50	4	0	0	56	3	31	11	0	15
0	0	0	0	0	0	0	0	0	0	0	0	0	0	0	8	1				0	0	0	15	0	0	0	0	0	0	25	0	6	0	0					0	29	22	0	0	6	0	43	0	0	5
0	0	0	0	0	0	0	0	0	0	0	0	0	0	0	14	2				0	0	0	0	0	0	4	0	0	0	6	0	11	0	0					0	4	3	0	0	57	0	19	0	7	9
0	0	0	0	0	0	0	0	0	0	0	0	0	0	0	23	0				62	0	0	3	3	0	0	0	0	0	25	0	1	0	7					0	0	38	14	0	13	0	13	0	36	3
0	0	0	0	0	0	0	0	1	0	0	0	0	0	0	0	0				18	0	1	42	0	0	0	0	0	0	26	0	1	0	0					0	23	11	0	0	52	0	13	0	0	9
0	0	0	0	0	0	0	0	38	0	0	0	0	0	0	0	0				0	0	27	15	0	0	0	0	0	0	26	0	0	0	0					0	19	5	0	0	61	0	18	0	20	14
15	44	26	79	1	46	21	10	35	25	10	38	45	24	4	9	0				47	46	29	48	7	20	108	27	52	38	117	51	3	0	93					1	35	23	37	33	115	1	103	23	42	7
48	67	3	77	26	36	42	49	45	21	84	35	45	37	15	23	0				53	39	19	0	48	36	194	10	27	57	145	52	15	0	170					12	76	32	9	9	27	28	107	99	16	29
44	34	21	22	12	31	55	54	38	17	38	54	31	38	9	20	0				49	44	91	12	18	32	180	15	6	13	104	22	0	0	216					7	15	57	9	2	7	0	84	37	55	10
59	63	23	31	16	55	16	39	25	10	13	29	109	50	27	17	0				32	25	117	17	11	25	174	10	7	4	59	14	4	0	141					9	86	37	24	0	8	2	94	52	94	45
47	30	5	35	22	14	11	59	52	26	47	17	38	28	0	17	0				37	37	15	0	1	31	143	6	22	4	63	80	2	0	152					13	6	118	13	3	109	0	72	7	19	17
21	82	26	27	2	7	127	30	19	12	17	4	32	30	0	26	0				35	55	50	51	0	59	162	14	15	48	66	65	31	0	132					27	19	23	84	22	86	0	30	6	32	30
46	48	12	5	7	9	16	30	19	0	49	28	57	55	0	8	0				31	5	6	34	1	17	138	14	24	23	23	0	0	0	148					16	56	56	14	6	21	24	59	9	31	10
34	28	0	51	0	2	34	26	4	12	0	0	30	6	20	35	0				64	35	11	30	9	1	136	26	12	37	36	0	1	0	88					31	19	83	8	6	98	65	40	2	20	21
20	70	0	13	43	7	0	25	18	38	12	0	23	48	52	21	0				23	21	34	32	55	0	111	7	33	20	74	23	1	0	133					32	24	62	22	6	139	79	14	0	24	8
25	38	0	92	0	0	0	7	9	9	6	0	41	35	55	16	0				32	0	89	15	142	0	139	5	56	12	31	88	1	0	144					13	40	114	21	2	59	32	14	0	29	11
0	0	0	37	0	0	0	0	0	0	0	0	34	3	76	28	0				32	32	0	21	9	26	138	13	31	27	61	154	2	0	115					15	10	38	9	9	13	49	39	14	82	6
30	0	0	4	3	0	0	16	0	1	4	4	58	53	36	25	0				66	47	0	45	0	0	143	7	27	7	56	14	2	0	149					13	49	34	19	2	59	81	16	0	88	8
1	0	0	13	14	0	0	29	80	3	0	1	0	0	6	34	0				13	26	20	27	0	3	129	9	65	41	92	33	2	0	129					54	55	35	16	4	81	6	19	0	35	12
0	22	0	0	7	0	0	25	0	25	0	0	18	15	1	13	0				34	38	0	36	31	0	146	67	32	7	77	8	2	0	145					30	37	36	40	7	85	97	51	3	27	21
0	53	0	3	31	0	0	3	0	0	0	0	14	3	29	41	0				111	33	5	42	172	0	144	12	46	45	64	0	34	0	101					58	54	33	54	15	37	13	49	49	46	9
0	16	0	0	2	0	0	3	1	2	0	1	0	0	35	4	0				43	37	0	51	77	0	141	23	81	50	60	0	6	0	161					7	121	38	39	0	0	54	76	45	34	36
0	22	0	0	0	0	0	5	0	1	0	3	0	20	8	15	0				31	32	12	114	7	0	138	4	60	0	85	0	1	0	114					11	136	111	21	2	31	185	26	54	34	19
0	23	0	0	7	0	0	0	15	0	0	0	0	1	27	19	0				27	21	62	53	49	0	132	0	41	0	78	38	1	0	111					25	51	24	42	22	8	5	15	14	28	14
0	0	7	5	25	0	0	20	0	0	0	0	0	33	17	29	0				55	7	110	68	0	0	136	0	48	56	33	37	42	0	144					32	89	84	16	21	63	0	63	24	57	4
0	0	0	8	0	0	0	0	0	1	0	0	0	9	0	13	0				21	51	0	82	2	0	144	0	71	19	24	1	22	0	124					24	73	43	60	32	2	141	51	0	13	10
0	0	3	19	0	0	0	0	0	6	0	19	0	7	0	20	0				62	14	46	80	1	0	140	16	78	17	37	12	3	0	116					34	20	73	23	48	13	0	31	0	19	11
0	0	0	1	0	0	0	30	0	6	0	13	1	5	2	17	40				48	53	55	105	58	0	141	8	41	48	61	22	2	0	162					31	33	62	26	16	67	3	13	77	49	26
0	0	0	0	0	0	0	0	18	0	0	1	13	8	1	18	14				54	37	61	60	0	0	129	44	47	50	62	42	39	0	227					75	21	19	42	15	34	16	73	9	28	15
11	0	0	12	0	0	0	0	28	0	0	16	0	11	1	14	12				60	43	53	83	2	0	123	46	71	77	86	29	1	0	158					39	42	16	37	22	0	27	23	76	35	8
37	46	0	80	25	55	23	31	28	19	26	74	74	40	66	32	4				135	78	47	43	24	51	46	48	48	73	103	54	17	0	90					8	31	71	42	19	35	25	26	56	15	17
2	0	0	0	34	74	0	9	0	0	57	15	67	1	84	10	2				47	54	30	27	22	56	0	25	15	78	39	107	48	0	74					9	31	60	29	44	0	41	2	14	26	6
0	0	0	0	0	5	0	0	0	0	0	56	34	0	9	9	0				28	51	3	16	14	0	0	15	35	54	48	6	5	0	59					2	20	52	44	12	39	32	9	8	9	2
0	0	0	0	0	0	0	0	0	0	0	5	0	3	4	10	3				17	18	6	13	4	0	0	19	4	74	20	17	19	0	26					16	72	36	33	37	31	37	26	5	15	11
0	0	0	0	0	0	0	0	0	0	0	0	0	0	0	3	2				20	36	1	20	12	0	0	8	70	36	35	0	2	0	43					7	54	31	39	19	0	26	20	11	0	6
0	0	0	0	0	0	0	0	0	0	0	16	0	0	0	28	3				13	37	34	15	2	9	0	15	35	44	12	7	15	0	22					12	13	49	22	42	9	54	17	11	0	6
0	0	0	0	0	0	0	0	0	0	0	15	15	0	0	16	2				5	1	87	32	3	40	0	15	13	20	51	19	2	0	46					18	91	41	12	8	24	5	11	7	0	0
0	0	0	0	0	0	0	0	0	0	0	0	0	0	1	8	5				25	40	34	14	1	5	0	4	36	38	26	1	0	0	26					13	18	32	31	6	21	33	3	3	0	0
0	0	0	0	0	0	0	0	0	0	0	0	20	0	0	8	12				59	17	5	17	26	0	0	6	43	20	13	22	14	0	55					16	55	37	17	3	12	12	12	0	0	0
0	0	0	0	0	0	0	0	0	0	0	0	0	0	0	0	2				11	51	1	12	7	17	0	19	30	8	26	30	0	0	31					38	8	30	19	9	24	57	8	10	0	0
0	0	0	0	0	0	0	0	0	0	0	0	0	0	0	16	0				6	72	8	3	0	15	0	4	12	4	15	11	7	0	37					19	9	35	33	4	17	2	19	11	0	4
0	0	0	0	0	0	0	0	0	0	0	0	0	0	0	29	6				13	19	17	17	4	22	0	4	22	37	5	78	0	0	26					21	81	39	14	4	40	0	16	11	0	2
0	0	0	0	0	0	0	0	0	0	0	0	5	1	0	12	0				0	17	11	18	0	10	0	11	9	4	33	0	2	0	20					21	40	40	21	7	22	0	16	6	0	2
0	0	0	0	0	0	0	0	0	0	0	0	0	0	0	20	0				7	29	12	24	14	0	0	13	25	15	0	12	5	0	21					21	40	49	24	4	26	0	6	20	0	1
0	0	0	0	0	0	0	0	0	0	0	0	0	0	0	18	0				0	37	19	21	5	21	0	3	39	12	0	10	3	0	28					17	14	38	36	0	27	0	9	5	0	1
0	0	0	0	0	0	0	0	0	0	0	0	0	0	0	6	0				7	8	1	17	9	1	0	7	25	0	42	21	0	0	20					10	12	22	44	20	69	0	9	7	0	1
0	0	0	0	0	0	0	0	0	0	0	0	0	0	0	7	0				4	33	6	31	2	35	0	3	17	24	8	0	0	0	7					6	47	34	51	1	81	0	7	6	0	9
0	0	0	0	0	0	0	0	0	0	0	0	0	0	0	16	2				7	14	0	23	9	13	0	49	59	5	25	15	4	0	13					6	13	23	9	1	55	0	7	9	0	8
0	0	0	0	0	0	0	0	0	0	0	0	0	0	0	8	3				0	23	13	19	0	19	0	5	42	30	7	70	7	0	7					3	23	22	30	5	66	0	12	6	0	15
0	0	0	0	0	0	0	0	0	0	0	0	0	0	0	12	0				22	9	0	13	2	35	0	3	5	4	8	1	1	0	13					23	8	22	10	2	35	0	21	23	0	11
0	0	0	0	0	0	0	0	0	0	0	0	0	0	0	0	5				6	97	0	15	0	57	0	5	15	5	43	1	0	0	10					25	31	33	47	9	21	0	4	1	0	3
0	0	0	0	0	0	0	0	0	0	0	0	0	0	0	0	0				0	0	0	11	35	98	0	21	33	11	15	0	9	0	15					20	7	43	10	3	7	0	18	26	0	0
0	0	0	0	0	0	0	0	0	0	0	0	0	0	0	0	0				9	55	16	4	0	0	0	11	17	2	12	22	0	0	39					15	72	12	45	16	6	0	30	17	0	3
0	0	0	0	0	0	0	0	0	0	0	0	0	0	0	0	0				3	44	50	9	1	7	0	0	6	2	24	0	0	0	20					14	15	19	19	1	64	0	16	42	0	21
23	58	0	24	19	25	21	25	37	10	16	20	29	42	9	0	0				42	55	44	15	37	31	97	36	38	39	63	39	18	0	89					15	33	37	19	30	11	0	45	110	0	11
37	43	0	46	81	26	83	46	54	34	48	42	63	46	44	0	0				26	54	40	31	23	45	195	22	37	48	121	41	9	0	156					70	12	34	31	15	15	0	57	82	0	11
41	58	0	17	38	21	49	33	26	22	40	58	36	53	25	0	0				36	27	42	32	44	95	184	52	43	47	63	46	12	0	182					48	85	25	103	56	15	0	20	61	0	2
34	61	0	29	4	15	55	43	59	26	26	62	39	31	100	0	0				28	60	27	33	44	62	142	15	34	68	110	54	17	0	109					61	17	53	70	43	24	0	38	28	0	2
32	42	0	63	24	14	44	38	34	19	27	21	29	22	21	0	0				65	45	38	43	43	39	110	27	45	31	80	16	12	0	209					41	65	29	23	11	9	0	142	7	0	14
47	54	0	25	10	29	72	19	24	17	64	38	34	10	0	0	0				45	75	100	37	61	30	164	14	86	41	54	10	16	0	101					23	104	21	34	23	33	0	92	13	0	6
27	52	0	78	18	74	67	47	112	21	13	28	26	33	6	0	0				63	21	30	27	15	20	150	17	95	35	46	50	9	0	177					9	18	43	75	41	43	0	57	67	0	9
36	24	0	37	44	35	32	28	47	16	81	19	29	12	0	0	0				51	43	54	54	36	29	128	8	15	15	41	19	14	0	121					49	66	37	36	44	11	0	25	22	0	14
30	40	0	2	3	0	0	6	8	31	4	47	69	25	0	0	0				25	32	23	23	9	51	150	25	66	55	42	12	8	0	156					42	49	50	54	7	5	0	21	61	0	10
33	5	0	46	0	0	0	17	40	1	0	0	61	4	3	0	0				61	27	59	49	15	13	107	26	55	16	50	19	18	0	111					58	12	18	114	42	30	0	27	51	0	25
8	56	0	0	10	0	0	0	0	41	56	0	17	0	7	0	0				43	62	15	28	20	25	134	39	49	61	31	7	30	0	159					22	8	39	39	14	26	0	37	30	0	16
35	11	0	0	0	9	0	7	21	0	0	43	1	40	6	0	0				56	25	24	43	11	12	90	16	28	60	33	79	9	0	167					35	17	34	45	8	55	0	72	36	0	22
40	22	0	0	0	17	0	63	0	1	31	0	25	0	14	0	0				87	81	5	27	20	11	108	42	47	46	19	15	8	0	149					27	9	73	44	11	54	0	64	9	0	13
0	18	0	0	0	38	0	0	0	2	0	0	36	0	0	0	0				85	20	40	31	31	86	155	10	38	24	23	27	27	0	175					27	1	30	82	31	29	0	68	28	0	2
30	29	0	6	0	0	0	0	0	1	0	0	0	0	39	0	0				38	55	61	30	52	32	110	14	36	71	31	24	9	0	171					22	30	37	130	30	23	0	72	41	0	8
0	43	0	0	64	0	19	0	0	28	0	0	18	0	33	0	0				38	35	33	31	7	7	141	21	18	33	46	25	22	0	106					20	1	48	35	33	8	0	61	12	0	6
0	18	0	0	28	18	2	0	0	0	0	0	16	0	10	0	0				55	32	5	33	22	24	163	42	42	40	41	0	19	0	124					35	69	16	51	30	14	0	71	43	0	6
0	0	0	0	0	0	1	0	0	0	0	0	0	0	43	0	0				55	73	73	48	13	28	165	19	18	38	23	42	13	0	154					26	66	20	134	14	5	0	42	65	0	10
0	0	0	0	27	37	4	3	0	3	0	0	0	0	19	0	0				43	47	35	42	37	50	162	16	61	45	55	45	15	0	130					14	188	54	43	20	40	0	55	20	0	0
0	0	0	0	22	2	4	1	0	0	0	0	0	0	0	0	0				35	47	18	59	69	16	170	13	26	74	51	15	24	0	162					45	18	17	15	9	31	0	25	20	0	0
11	0	0	0	17	0	6	0	0	0	0	0	0	0	3	0					37	8	28	31	25	51	71	35	63	27	39	28	0	0	185					21	75	8	34	14	36	0	30	10	0	0
4	0	0	0	6	0	30	0	0	3	9	0	0	0	0	0					54	45	30	38	53	28	70	36	22	45	48	19	54	0	162					24	66	23	76	13	22	0	25	16	0	0
14	8	0	0	0	0	1	5	0	0	0	0	0	0	10	0					38	58	37	44	6	14	94	30	22	54	53	16	45	0	114					38	47	30	42	0	0	0	25	8	0	0
21	16	0	0	0	0	50	1	0	20	8	0	11	55	0	0					56	30	33	43	6	17	125	37	1	36	34	46	27	0	115					27	0	26	35	0	2	0	21	2	0	0
57	4	0	50	28	46	36	57	14	17	35	44	35	18	6	0					67	48	51	29	21	45	53	57	35	65	86	89	39	0	101					29	10	20	47	0	32	0	5	16	0	0
30	0	0	0	42	80	7	24	35	31	26	17	69	0	19	0					31	45	38	37	26	49	0	41	24	39	56	27	28	0	41					11	38	36	25	0	0	0	2	5	0	0
0	0	0	0	0	3	0	8	2	9	0	0	75	0	4	0					46	55	39	47	38	34	0	47	28	37	63	50	22	0	35					7	0	28	11	0	6	0	36	9	0	0
0	0	0	0	0	7	0	0	0	0	4	0	55	0	49	0					36	53	21	42	10	21	0	26	30	32	58	31	11	0	10					31	0	61	35	0	43	0	0	22	0	0
0	0	0	0	0	8	0	0	4	0	0	0	0	0	9	0					18	72	51	40	18	7	0	11	37	10	1	43	7	0	52					22	69	43	36	0	15	0	0	22	0	0
0	0	0	8	0	22	0	0	0	0	0	0	0	0	0	0					15	20	14	41	11	0	0	14	31	13	50	16	32	0	18					25	17	20	17	0	28	0	0	2	0	0
0	0	0	0	0	0	0	0	0	0	0	0	0	0	0	0					10	47	16	40	9	0	0	10	13	31	21	19	40	0	37					17	2	29	39	0	29	0	0	7	0	0
0	0	0	0	0	0	0	0	9	0	0	0	0	0	0	0					16	39	17	34	13	16	0	10	38	5	91	8	67	0	34					2	41	17	41	0	17	0	0	25	0	0
0	0	0	0	0	0	0	0	7	0	0	0	0	0	0	0					18	28	5	41	16	15	0	15	31	20	14	11	17	0	53					13	0	41	20	0	4	0	0	1	0	0
0	0	0	0	0	0	0	0	10	0	0	0	0	0	0	0					0	37	25	52	39	39	0	34	57	7	57	13	37	0	42					17	0	38	60	0	44	0	0	2	0	0
0	0	0	0	0	0	0	0	0	0	0	0	0	0	0	0					23	39	14	40	14	30	0	9	6	36	13	15	52	0	23					7	0	16	6	0	36	0	0	8	0	0
0	0	0	0	0	0	0	0	0	0	0	0	6	0	0	0					7	53	18	38	28	31	0	6	20	12	53	10	0	0	26					23	0	12	7	0	16	0	0	5	0	0
0	0	0	0	0	0	0	0	0	0	6	0	50	0	0	0					15	35	22	28	21	31	0	9	44	5	16	7	0	0	8					3	40	36	15	0	17	0	0	37	0	0
0	0	0	0	0	0	0	0	0	0	0	0	19	0	0	0					33	13	16	33	12	27	0	27	15	12	34	6	9	0	29					17	0	10	23	0	40	0	0	4	0	0
0	0	0	0	0	0	0	0	0	0	0	0	0	0	0	0					4	21	8	41	3	15	0	8	19	7	17	12	23	0	34					20	79	21	19	0	92	0	0	4	0	0
0	0	0	0	0	0	0	0	0	0	0	0	0	0	0	0					0	53	9	41	41	18	0	3	7	28	14	4	0	0	12					24	7	39	15	0	10	0	0	22	0	0
0	0	0	0	0	0	0	1	0	0	6	0	1	0	0	0					8	26	3	47	2	18	0	24	56	5	14	6	0	0	39					8	3	31	11	0	87	0	0	30	0	0
0	0	0	0	0	0	0	0	3	0	0	0	0	0	0	0					16	4	7	42	21	0	0	20	9	25	15	21	0	0	40					2	14	26	14	0	30	0	0	3	0	0
0	0	0	0	0	0	0	0	0	0	1	0	0	0	0	0					10	16	17	29	21	16	0	21	9	14	11	2	0	0	21					3	17	24	29	0	9	0	0	3	0	0
0	0	0	0	0	0	0	39	0	0	3	0	0	0	0	0					1	33	16	28	17	3	0	8	4	7	6	10	0	0	37					12	28	31	13	0	11	0	0	2	0	0
0	0	0	0	0	0	1	0	0	0	0	0	0	0	0	0					6	15	9	38	1	28	0	33	19	0	19	4	3	0	19					21	0	35	26	0	50	0	0	5	0	0
0	0	0	0	0	0	0	2	0	0	17	0	0	0	0	0					0	28	0	42	15	3	0	4	61	5	25	0	19	0	3					22	17	27	8	0	2	0	0	7	0	0
0	0	0	0	0	0	0	0	0	0	1	0	0	0	0	0					10	5	3	27	60	5	0	15	40	1	20	0	1	0	19					32	97	18	14	0	34	0	0	26	0	0
0	0	0	0	0	0	0	0	0	0	4	0	0	0	0	0					9	16	0	31	10	4	0	11	6	12	7	17	0	0	1					1	3	7	29	0	43	0	0	12	0	0
Daily crossings
DMSO	100 μM amitraz	1 mM amitraz
4.4	15.04	10.7
6.86	16.18	30.66
1.26	12.86	30.05
6.14	15.4	16.41
2.77	8.96	6.73
3.41	7.61	37.03
3.45	34.55	13.88
5	6.96	28.24
4.72	16.48	10.72
2.34	13	15.44
3.63	22.04	8.6
4.44	12.89	15.84
8.04	3.77	11.15
5.64	41.21	23.95
5.85	15.61	15.02
7.5	18.58	11.68
5.9	13.13	15.38
6.62	17.8	14.68
4.31	11.66	19.24
4.85	12.71	5.39
5.26	32.38	12.36
5.84	10.75	12.35
5.13	16.24	11.21
5.46	14.77	1.87
3.53	19.58	22.81
5.22	11.15	10.68
4.39	8.42	19.95
8.49	42.18	25.12
3.91
4.79
[truncated: 3 more columns]

## Sheet: Figure 3F
Figure 3F oct-tyrRG4
Crossings per 30 min
DMSO																														100 uM Amitraz
60	36	18	27	9	19	44	36	66	0	7	35	16	26	28	22	17	63	40	158	20	21	8	15	26	6	70					57	12	18	26	20	10	98	14	17	1	32	43	19	80	40	4	1	52	5
4	0	0	0	0	0	4	0	0	0	0	0	0	0	0	0	0	7	0	125	0	0	0	0	0	0	18					1	0	1	7	0	1	97	0	0	0	13	0	5	3	0	1	0	23	31
0	0	0	0	0	0	0	0	0	0	0	0	0	0	0	0	0	0	0	126	0	0	0	0	0	0	0					3	9	11	41	5	0	82	0	9	2	41	0	0	33	0	0	0	6	12
0	0	0	0	0	0	0	0	0	0	0	0	0	0	0	0	0	0	0	127	0	0	0	0	0	0	2					4	0	15	43	11	0	93	19	6	3	35	0	4	51	0	0	0	5	6
0	0	0	0	0	0	0	0	0	0	0	0	0	0	0	3	0	0	0	127	0	0	0	0	0	0	14					8	0	46	40	2	1	91	13	1	17	2	0	0	96	0	0	0	19	37
4	0	0	0	0	0	2	0	0	0	0	0	0	0	0	0	0	0	0	127	0	4	0	0	1	0	10					0	4	12	28	0	47	93	0	12	27	22	0	0	36	0	4	0	16	2
3	0	0	0	0	0	0	0	0	0	0	0	0	0	0	9	0	0	0	127	0	0	0	0	5	0	10					59	66	0	1	4	4	106	6	16	3	11	0	0	35	0	3	0	39	6
0	0	0	0	0	0	0	0	0	0	0	0	0	0	0	0	0	0	0	130	0	0	0	0	2	0	11					0	37	0	2	2	3	116	9	14	0	22	1	0	31	0	4	14	52	44
0	0	0	0	0	1	5	3	0	0	0	0	2	0	0	7	0	0	0	127	0	0	1	0	3	0	7					3	0	25	4	4	4	84	7	76	4	11	3	0	10	0	2	0	1	7
0	0	0	0	0	17	10	0	0	0	0	0	0	0	0	0	0	0	0	128	0	4	0	0	0	0	8					7	15	17	52	2	0	94	93	3	27	0	20	0	47	0	10	1	36	16
0	0	0	0	0	0	0	0	0	0	0	0	0	0	0	0	0	0	0	127	0	0	0	1	0	0	14					1	50	90	64	5	25	109	40	16	3	0	4	0	24	0	6	6	13	40
28	0	0	0	0	0	0	0	0	13	0	0	0	0	0	0	0	0	0	55	0	0	0	44	0	0	6					0	0	49	16	6	0	99	24	9	0	0	16	0	33	0	1	3	15	20
0	0	0	0	0	16	0	0	0	36	0	0	0	14	0	0	0	0	0	7	0	0	0	8	0	0	13					0	0	3	18	6	0	101	17	18	0	6	1	0	12	17	28	2	28	27
2	0	0	0	0	55	0	0	0	2	0	0	0	2	0	17	0	0	0	0	0	0	0	0	0	0	12					0	3	3	0	1	2	101	8	1	9	0	7	0	37	5	15	0	1	14
0	0	0	0	0	0	0	0	0	0	0	0	0	4	0	0	0	0	0	124	0	0	0	0	0	0	10					0	10	16	28	3	38	89	0	0	18	0	10	0	26	62	3	0	16	17
0	0	0	0	0	0	0	0	45	0	0	0	0	2	0	0	16	0	0	127	0	0	0	0	0	0	4					0	5	47	29	14	30	99	0	0	24	0	0	0	53	0	1	0	0	7
9	0	0	0	0	0	0	0	0	0	0	2	0	0	0	0	0	0	0	127	0	0	0	0	0	0	4					0	18	13	0	8	0	94	2	0	10	0	0	0	49	0	1	0	0	3
0	0	9	0	0	0	0	0	0	0	0	0	0	0	0	0	0	0	0	127	0	0	0	0	0	0	10					0	0	48	0	0	0	112	5	15	1	0	0	0	27	0	5	0	14	21
0	0	2	0	0	0	0	0	2	0	0	0	0	0	0	0	0	0	0	128	0	0	0	0	0	0	7					0	0	0	5	0	0	99	3	1	9	0	0	0	61	0	2	0	0	7
0	0	0	0	0	0	0	0	1	24	0	0	0	18	0	0	0	0	0	127	0	0	0	0	0	16	13					13	2	38	19	0	55	101	5	19	0	0	0	0	37	0	4	0	31	1
0	0	0	0	0	0	0	0	19	12	0	0	0	0	0	0	0	0	0	126	0	0	0	0	0	0	9					0	0	0	1	2	4	101	0	1	6	0	0	0	10	0	3	0	8	11
0	0	0	0	0	0	0	0	0	0	0	13	0	8	0	0	0	0	0	128	0	0	20	0	0	2	6					0	0	0	8	0	7	96	3	19	4	0	0	9	8	0	0	0	14	3
0	0	0	0	0	0	0	0	3	0	0	11	0	5	0	0	0	0	0	126	0	0	0	0	0	1	5					0	0	0	30	0	67	96	0	12	5	0	0	12	13	0	9	0	37	0
0	0	0	0	0	0	0	5	16	0	0	6	42	58	0	0	0	0	0	126	0	0	0	0	0	0	14					14	0	20	24	0	39	95	1	38	12	0	0	2	37	0	1	0	10	3
49	53	83	16	8	32	38	50	61	53	53	67	212	39	25	83	95	48	43	213	40	69	73	59	30	26	161					40	23	62	36	47	46	183	39	24	36	63	29	21	127	106	35	48	33	35
42	83	66	33	25	100	30	53	41	35	28	136	183	34	88	22	23	45	58	243	46	56	54	57	75	32	151					23	41	26	31	30	49	193	33	15	19	24	40	9	102	28	20	13	11	36
41	75	71	40	23	51	40	33	33	18	27	37	125	7	42	19	27	31	37	247	31	37	51	29	27	30	150					2	13	43	5	11	15	170	31	34	36	1	2	22	89	4	47	5	11	27
38	38	64	6	66	60	32	37	31	0	22	71	126	9	72	49	36	27	66	223	40	34	44	18	38	26	158					34	41	28	22	24	33	165	33	24	20	4	11	22	123	50	19	3	5	9
54	47	37	46	17	4	19	18	28	0	14	68	119	38	35	5	65	27	82	251	39	32	39	70	7	33	142					19	30	15	18	19	76	172	19	26	11	20	32	21	98	41	25	5	6	3
32	19	37	28	10	0	44	41	29	25	20	39	131	31	18	10	22	18	27	240	34	44	40	50	13	20	143					11	48	64	16	28	59	183	28	31	13	24	20	28	135	45	22	33	20	11
35	52	83	33	25	35	31	20	42	29	35	27	125	8	53	71	83	29	43	201	35	33	54	34	2	29	162					2	61	18	9	28	28	181	22	34	10	15	36	31	119	41	18	9	16	1
41	37	48	40	9	21	6	52	25	73	24	10	123	31	14	4	79	29	93	151	56	19	14	37	0	20	126					0	9	66	6	20	25	182	14	53	13	58	4	42	90	10	8	20	52	13
12	21	24	27	2	17	0	12	23	14	11	7	163	0	2	46	42	28	42	180	31	34	22	27	0	3	152					31	26	29	25	25	66	169	20	16	9	183	33	23	98	14	8	18	40	9
43	39	40	7	8	0	51	13	40	21	16	14	126	26	11	7	30	14	71	156	0	15	6	84	1	19	141					9	15	32	1	31	40	171	36	22	7	30	10	41	110	49	23	39	41	19
13	23	7	8	10	46	4	0	0	0	32	7	131	0	23	8	54	1	22	184	15	0	14	24	0	4	141					33	12	24	4	19	72	171	51	11	26	27	3	24	111	2	20	26	45	34
5	11	0	1	2	39	16	0	0	10	13	19	122	0	1	21	1	40	9	146	0	44	15	26	16	0	124					42	15	18	22	26	40	177	25	21	13	9	5	26	93	48	18	18	96	17
9	23	0	2	5	2	0	0	0	3	32	39	146	0	0	0	10	17	38	139	2	9	6	14	2	0	128					27	20	43	16	28	36	170	3	57	11	58	0	31	91	50	33	37	82	20
2	15	0	7	11	0	0	0	0	4	3	29	190	0	0	17	34	24	0	183	0	26	31	4	1	0	128					34	6	20	23	28	39	149	14	21	27	30	20	32	101	9	15	20	26	41
0	3	0	6	4	32	0	0	21	17	1	3	138	30	0	2	28	17	10	174	0	6	16	17	0	0	149					49	12	50	21	35	37	176	40	30	16	26	4	25	136	32	0	21	7	5
50	11	0	1	2	24	0	0	0	22	0	0	122	38	0	1	0	12	11	120	31	9	14	13	2	0	129					27	19	37	23	54	31	180	23	10	6	36	10	28	104	46	9	1	61	27
12	0	5	0	87	27	2	0	5	26	0	0	127	35	0	0	23	8	2	198	15	0	6	16	13	0	129					20	22	8	41	35	35	178	33	38	4	11	0	26	100	55	5	23	4	10
1	0	11	10	35	6	0	0	3	0	0	51	126	1	1	24	9	27	2	167	5	9	32	16	5	0	126					20	4	28	32	32	37	178	54	43	3	13	47	31	98	32	6	14	21	31
19	0	0	5	5	6	0	0	12	22	0	14	127	19	3	8	9	31	0	126	46	25	37	22	4	0	127					7	39	2	34	36	13	182	34	49	13	25	6	31	104	12	5	20	27	32
12	0	41	0	28	69	1	0	0	13	3	54	135	19	14	8	0	11	11	185	4	3	12	25	19	0	167					23	14	0	26	32	13	178	33	50	5	39	7	25	107	36	2	17	22	21
14	30	9	0	2	25	11	5	12	46	32	8	134	48	11	5	12	0	4	185	43	0	16	27	51	8	127					0	29	23	28	27	19	177	40	46	33	45	26	25	117	70	5	13	12	33
7	0	7	1	8	29	0	4	0	14	14	2	122	16	13	27	2	12	0	165	22	32	35	20	13	5	127					2	25	45	35	30	39	180	16	57	8	38	26	42	119	4	23	38	14	34
34	17	37	18	14	8	23	27	33	27	17	21	143	20	30	20	35	13	14	192	54	30	47	56	25	22	153					10	25	29	30	33	27	177	34	60	20	39	39	29	118	27	46	44	20	33
69	58	71	43	13	42	39	43	52	25	35	34	133	29	53	31	95	34	71	205	57	24	70	32	31	37	147					47	37	39	44	40	44	179	54	64	61	58	47	42	119	20	36	39	28	40
22	15	22	32	11	30	41	15	20	3	26	45	8	12	17	55	7	12	17	43	7	36	21	36	8	14	14					64	24	20	45	30	22	100	33	19	28	76	17	75	72	7	62	10	25	35
7	0	0	3	0	0	13	1	0	30	1	1	11	0	0	2	0	0	6	0	0	12	1	15	0	0	0					0	2	19	51	6	0	97	45	0	7	7	0	67	7	27	3	17	16	6
4	0	0	0	0	1	4	4	1	61	0	0	0	0	0	0	0	0	8	28	0	4	8	2	0	0	0					0	0	2	3	27	8	95	7	0	3	34	0	26	1	8	0	2	0	0
0	0	0	0	0	0	0	8	0	0	0	0	0	2	0	0	0	0	7	40	0	6	0	20	0	0	0					4	0	0	105	3	2	89	12	3	10	5	0	31	0	1	1	0	13	0
12	0	0	2	0	0	0	0	0	0	3	0	0	16	0	0	0	0	4	10	0	26	0	3	0	0	0					0	0	41	28	14	0	101	3	12	33	7	0	17	1	27	4	21	19	0
0	0	1	0	0	0	0	0	0	0	2	0	0	0	0	0	0	0	14	62	0	0	0	10	0	23	0					0	0	1	7	3	0	100	8	31	0	2	0	15	0	0	0	8	11	0
0	0	0	0	0	0	0	0	0	0	0	0	0	0	0	0	0	0	1	15	0	17	0	3	0	0	0					0	0	32	21	5	0	95	11	8	0	4	0	9	0	0	0	7	21	0
0	0	0	2	0	0	0	0	0	0	1	18	0	0	0	0	0	0	30	0	0	18	0	4	0	9	0					2	0	8	11	9	0	104	5	6	0	8	0	7	0	0	3	21	0	19
0	0	0	0	0	4	0	22	0	2	43	7	0	0	0	0	0	0	5	0	0	0	8	2	68	0	6					0	0	8	2	0	0	99	8	7	0	14	0	14	0	15	0	6	45	0
0	0	0	0	0	0	0	8	25	0	0	3	0	15	0	0	0	0	26	0	0	0	28	3	0	0	15					0	0	0	15	16	0	94	36	48	0	0	0	22	1	74	3	0	11	18
0	0	18	0	0	0	0	0	19	0	23	0	0	0	52	0	0	0	11	17	0	13	3	29	0	0	0					0	0	11	76	2	0	94	33	9	0	0	0	6	0	2	6	0	0	0
0	0	0	4	0	0	0	0	0	0	12	17	0	0	0	0	2	0	0	4	0	0	13	0	0	0	1					0	0	6	5	0	0	92	11	26	0	0	0	12	0	0	0	17	20	2
0	0	9	5	0	0	0	44	17	0	0	0	0	0	89	0	0	0	13	0	0	0	2	24	4	0	0					1	0	0	26	0	5	105	0	26	0	0	0	16	1	5	6	0	1	0
0	0	1	5	0	0	7	41	14	0	8	12	0	14	3	0	0	0	0	0	0	48	0	0	5	0	41					0	0	0	26	0	8	93	10	0	0	0	0	11	0	1	0	0	25	0
0	0	4	7	0	0	0	0	15	2	2	0	0	32	18	8	0	0	0	9	0	38	1	10	0	0	0					0	0	0	33	0	4	102	14	0	0	0	0	12	0	0	0	35	10	0
0	0	14	30	0	0	0	0	0	0	0	0	0	6	0	0	0	0	22	2	0	3	12	5	0	10	0					5	0	0	22	0	6	95	9	0	0	0	0	13	0	0	0	13	34	0
0	0	4	0	0	4	0	3	3	1	0	0	0	0	11	0	0	0	0	30	0	13	1	0	0	0	0					0	0	0	0	0	3	100	4	0	0	0	0	6	0	0	3	3	11	0
0	0	18	2	0	0	0	0	0	0	0	0	0	0	0	0	2	0	34	2	0	7	0	1	0	0	0					0	0	0	12	0	5	100	0	0	0	0	0	9	1	7	15	0	25	0
0	0	1	2	0	0	0	15	0	0	0	0	0	1	12	0	0	0	0	0	0	5	6	3	0	0	0					0	0	0	0	0	14	98	0	0	0	0	0	10	1	31	3	11	11	0
0	0	0	1	0	0	0	7	0	0	17	3	0	25	0	0	0	0	0	1	0	0	0	0	0	0	0					0	0	0	0	0	5	89	18	0	0	0	0	14	0	5	3	8	5	0
0	0	15	0	0	0	0	10	7	26	32	0	0	0	4	0	0	0	0	37	0	23	24	8	0	0	0					0	0	0	0	0	8	96	23	0	0	0	0	20	0	0	1	8	11	0
17	0	0	41	0	0	2	0	0	0	0	0	0	0	0	0	0	16	0	35	0	41	9	6	0	34	0					0	0	0	11	0	0	97	3	0	0	0	0	10	0	0	3	8	0	0
7	0	11	0	0	4	9	0	2	2	0	0	0	0	0	0	0	0	19	22	0	12	0	5	0	0	0					0	0	0	13	0	0	95	8	0	0	0	0	12	0	0	4	11	0	0
1	0	19	0	0	0	13	29	10	1	0	0	0	10	0	0	0	29	0	64	0	8	0	2	0	0	0					0	0	0	0	4	0	89	0	0	0	0	0	5	0	0	1	4	11	0
43	27	37	33	50	32	31	45	55	77	53	32	122	51	37	59	23	44	50	166	49	49	65	67	70	37	144					59	25	33	44	46	42	183	53	54	46	53	44	35	140	52	47	41	48	21
38	49	73	26	34	33	30	34	33	2	23	122	122	41	72	16	47	34	36	159	48	23	46	42	52	31	143					22	8	27	44	10	41	168	9	48	59	43	45	32	108	94	36	37	33	24
35	56	36	25	37	43	22	36	41	0	42	39	122	16	25	7	53	32	52	150	45	25	52	53	27	46	141					4	26	14	29	11	6	136	14	27	29	14	25	32	120	10	23	19	18	18
33	61	31	12	25	90	15	34	33	54	40	88	122	22	5	9	10	33	46	146	38	35	54	29	43	22	133					13	18	15	25	11	15	154	2	9	62	5	21	30	88	4	27	15	14	3
35	31	35	9	15	28	41	34	28	34	37	11	121	46	34	8	31	27	48	175	44	20	25	54	42	27	126					16	19	19	30	32	27	152	20	26	26	6	46	40	103	37	18	26	38	15
42	41	16	13	53	17	49	25	13	16	17	14	121	13	14	16	14	41	36	137	14	17	37	31	32	21	149					3	20	27	17	19	2	169	25	13	22	14	26	38	94	17	7	9	62	23
10	44	31	22	9	36	5	21	16	7	10	34	120	40	32	0	16	32	13	142	27	23	22	30	11	14	121					30	24	10	46	13	21	152	44	19	43	6	40	28	115	37	7	18	31	18
32	22	34	0	5	0	6	2	15	8	3	0	116	17	39	7	30	28	18	155	20	15	36	10	20	13	118					38	23	7	46	47	32	166	19	4	13	25	32	24	98	42	21	39	26	12
15	15	35	6	8	11	18	15	11	16	32	3	117	9	2	6	38	29	16	124	15	9	7	21	5	19	127					14	1	20	51	16	10	163	30	51	51	5	36	32	123	33	26	6	52	24
8	17	6	4	12	0	4	9	5	22	11	5	116	6	4	2	12	17	10	126	6	4	21	19	5	10	130					66	9	20	33	18	16	156	56	24	30	6	7	22	127	19	40	2	27	6
32	11	9	4	15	6	0	26	2	38	18	1	117	8	0	6	11	37	1	139	16	2	25	24	1	10	131					12	21	3	1	14	31	144	7	24	17	7	15	24	102	51	12	48	28	15
0	12	0	0	25	0	5	0	9	18	25	11	121	0	0	0	0	21	0	109	2	0	2	18	1	0	120					39	7	0	28	18	17	150	41	25	25	9	3	17	94	65	14	26	40	0
0	0	10	0	26	24	0	20	0	13	30	10	115	38	0	0	1	40	3	105	1	0	0	8	0	0	118					7	20	14	21	46	20	157	57	29	26	8	0	40	95	82	18	40	34	8
4	15	22	0	14	19	1	15	5	8	8	0	121	0	11	2	27	0	8	94	1	0	3	9	0	3	130					73	3	9	10	8	37	163	11	15	13	6	3	23	115	37	11	22	8	0
26	2	10	0	18	69	9	5	7	0	13	29	120	0	0	27	1	18	0	124	0	27	31	9	0	0	128					43	0	16	25	45	13	164	11	38	4	9	30	21	98	42	3	39	0	44
6	4	18	0	7	29	0	6	5	45	14	22	106	3	18	0	4	0	0	128	2	25	17	21	1	0	122					15	23	14	16	42	0	137	20	25	0	9	30	22	71	26	12	14	15	15
8	2	0	0	5	13	0	0	8	24	16	10	119	11	2	1	4	0	0	140	13	4	12	12	0	0	130					73	36	36	10	42	29	171	14	26	4	25	39	16	99	53	15	18	3	7
9	0	16	0	2	31	0	0	0	2	21	29	114	4	34	30	38	0	5	141	1	0	27	10	0	1	119					39	31	0	2	33	35	160	17	27	0	17	42	25	85	27	13	24	7	7
6	0	5	0	5	32	0	0	9	24	2	0	118	21	11	8	43	0	37	152	0	28	13	15	1	0	140					0	3	4	31	31	7	170	78	32	0	21	39	14	109	7	9	13	8	4
3	0	18	0	4	64	0	0	0	14	5	2	120	3	18	3	7	0	0	125	1	17	0	30	4	7	155					0	52	23	34	38	27	177	29	67	6	39	38	20	89	44	2	12	0	23
20	0	0	0	1	72	0	0	13	34	19	8	106	23	11	14	81	0	4	129	14	21	0	16	9	0	135					0	39	0	53	44	23	176	37	35	14	32	47	34	90	29	0	22	5	6
14	0	12	0	6	15	0	4	4	36	30	12	121	57	11	14	14	0	14	141	18	9	25	18	10	8	121					0	33	3	42	28	17	184	54	37	21	29	56	28	133	32	19	25	7	14
43	27	16	0	9	3	7	17	39	35	18	31	120	31	21	31	38	15	36	172	33	25	45	29	9	2	127					0	36	34	28	34	39	184	37	29	34	40	60	42	119	37	30	38	20	41
40	9	50	0	7	30	26	8	22	67	18	115	119	39	33	24	35	38	47	148	29	14	21	32	46	4	138					0	28	38	39	42	29	181	34	40	45	57	42	32	113	30	36	29	23	36
55	25	33	58	11	45	23	66	24	26	17	49	4	28	29	38	8	29	29	34	12	61	23	36	22	19	27					69	24	74	72	20	24	89	27	25	29	41	31	47	60	16	58	36	31	9
14	0	0	6	2	20	0	11	8	5	2	0	0	13	0	24	1	12	59	0	0	2	14	25	0	3	4					0	3	38	35	12	1	87	16	3	16	7	9	49	1	15	7	4	25	0
12	0	0	32	0	5	5	68	11	55	2	3	0	2	6	8	64	0	30	0	0	0	48	17	0	0	0					21	0	8	29	7	2	87	15	6	6	0	5	54	0	6	2	11	6	0
5	0	0	63	0	0	3	15	13	0	0	0	0	12	0	1	3	0	22	0	0	13	0	14	0	1	0					18	0	7	50	0	3	86	28	0	47	0	7	19	0	5	0	9	6	10
0	0	0	5	0	0	3	0	5	1	0	0	0	0	0	0	0	0	2	0	26	9	0	7	0	17	0					17	0	1	75	0	2	86	7	4	0	0	3	32	0	17	3	38	0	5
4	0	0	2	0	0	0	8	0	8	2	1	0	0	0	0	2	0	0	0	10	47	25	16	0	0	0					29	0	0	31	6	0	89	28	0	5	0	6	19	0	0	7	33	0	21
14	0	0	0	0	0	1	34	12	13	0	0	0	0	0	0	0	0	0	0	0	0	12	7	2	0	0					15	0	26	22	30	13	88	13	14	9	0	7	27	0	27	4	13	29	2
0	0	0	5	0	0	2	11	0	3	0	0	0	3	0	2	13	0	17	0	2	3	0	2	0	71	0					24	0	51	35	13	2	85	62	44	0	0	28	17	0	4	4	4	21	7
6	0	0	0	0	0	0	14	0	7	0	0	0	0	0	0	0	0	5	0	0	1	9	5	0	7	0					32	0	15	20	3	0	87	49	25	0	0	16	14	0	9	8	0	12	3
1	0	0	0	0	0	0	12	24	0	0	0	0	0	0	18	0	0	0	8	2	0	0	21	1	0	0					63	0	14	0	8	0	88	28	19	0	0	8	33	0	0	3	0	0	0
0	0	0	0	0	0	0	3	0	13	0	8	0	11	0	0	3	0	0	23	10	0	0	8	0	0	25					35	0	0	0	3	15	91	35	4	0	0	19	27	0	40	4	0	0	9
0	0	0	0	0	0	0	1	0	0	0	14	0	3	0	1	0	2	0	33	0	0	0	8	0	0	5					30	0	0	0	7	4	90	57	29	0	0	28	20	0	51	2	0	0	0
49	0	0	25	0	0	0	0	22	0	0	14	0	0	0	0	0	0	0	26	0	0	0	5	0	0	0					1	0	0	0	0	4	90	34	4	0	0	16	28	0	1	6	0	0	0
9	0	0	7	0	0	0	9	0	0	13	1	0	19	0	0	0	0	0	65	0	0	0	19	0	9	8					11	0	0	0	0	0	90	28	10	0	0	24	54	0	40	2	0	0	0
0	0	0	0	0	0	0	7	0	35	0	9	0	3	0	0	4	0	6	35	0	0	0	5	0	0	0					0	0	0	0	4	0	90	27	0	0	0	22	15	0	26	0	0	0	14
24	0	0	14	0	0	0	15	57	0	0	46	0	4	15	0	0	0	0	64	0	0	0	8	0	0	0					6	0	0	0	7	1	90	37	0	0	0	12	18	0	3	0	0	0	3
0	19	0	56	1	0	1	39	17	0	0	0	0	0	7	0	0	0	37	63	0	0	0	8	0	0	0					0	0	0	0	0	3	91	37	0	0	0	16	21	1	0	3	0	21	12
0	36	0	1	0	0	4	14	8	0	0	0	0	0	6	0	0	0	2	63	0	49	9	16	0	0	28					0	0	0	0	10	11	91	28	0	0	0	5	10	5	0	3	0	3	0
12	26	0	3	0	0	0	10	0	0	0	0	0	0	13	0	5	0	21	30	0	3	16	7	0	19	8					28	0	0	0	2	7	91	23	0	0	0	8	12	12	0	5	0	12	0
0	0	0	15	0	0	0	0	0	0	11	0	0	4	12	0	8	0	6	76	0	19	0	18	0	3	0					24	0	0	0	0	2	90	29	0	0	0	0	18	8	0	7	0	18	0
4	0	0	0	0	0	0	0	0	0	0	0	0	10	24	8	0	0	12	63	0	41	0	19	0	0	10					19	0	0	0	0	4	90	9	0	0	0	0	13	5	30	0	0	10	0
19	4	0	0	0	0	0	2	0	0	18	3	0	0	0	0	0	0	0	7	0	0	5	52	0	11	13					22	0	0	0	0	3	89	22	0	0	0	0	18	3	5	0	0	9	0
6	6	0	0	0	0	5	0	8	1	0	3	0	6	0	8	0	0	0	0	0	0	0	6	0	4	0					22	0	0	0	0	6	89	8	0	0	0	0	16	8	14	0	0	7	0
47	18	0	0	0	1	18	3	0	9	0	6	0	3	0	1	0	0	0	23	0	17	0	10	0	0	16					14	0	0	0	0	7	91	4	0	0	0	0	3	18	24	6	0	4	0
Daily crossings
DMSO	100 μM amitraz	1 mM amitraz
6.62	6.49	19.74
7.04	5.88	6.75
6.7	6.12	5.15
8.78	8.97	6.41
5.14	10.6	9.29
4.3	8.37	6.58
7.18	10.09	8.71
5.41	6.72	17.41
4.76	10.3	18.2
6.15	10.31	5.67
6.24	5.01	6.99
6.25	10.33	15.58
6.02	4.74	5.39
8.63	11.16	6.34
12.67	26.94	5.26
6.11	10.41	6.66
7.15	5.69	11.49
5.53	7.34	7.47
8.25	10.25	9.97
6	6.21	4.79
9.73	7.83	7.98
3.36	5.13	3.23
6.53	7.34	11.61
9.2	9.24	6.41
8.85	5.72	9.08
9.68	7.66	2.33
4.6	22.41	13.99
4.04	8.54	3.71
5.65	6.55	10.69
7.83	5.59	4.69
5.79	10.66	5.09
5.53	5.32	4.74
4.46	6.2	10.29
4.06	10.74	6.12
7.68	8.2	12.26
4.4	6.5	17.56
3.34	4.28	10.88
6.98	13.7	5.96
5.82	9.11	9.03
7.7	7.02	9.42
5.7	5.33	4.64
7.85	10.36	5.49
8.75	12.55	8.06
6.2	26.49	5.69
5.46	12.4	11.9
3.99	5.8	5.52
6.89	7.3	8.56
5.29	7.61	4.19
7.28	4.79	2.66
3.14	6.88	10.53
4.99	21.41	11.69
6.57	6.39	8.57
7.47	14.31	9.33
9.46	3.95	6.97
4.14	9.34	13.64
4.39	14.54
	6.53
	8.35
[truncated: 40 more columns]

## Sheet: Figure 3G
Figure 3G
Crossings per 30 min
octβ2Rf05679
DMSO
0	10	0	13	23	0	0	18	15	57	27	13	11	0	0	15	17	38	8	11	0	19	0	8	4	7	121	9	6	0	13	0					16	0	21	0	23	2	51	4	13	11	0	0	8	1
3	98	29	14	8	5	2	43	95	11	8	7	9	0	3	3	0	0	8	2	1	10	0	0	2	12	31	46	16	41	14	20					0	3	3	0	4	8	29	14	6	9	0	0	5	10
21	54	9	8	9	13	0	28	14	9	58	8	24	0	13	6	17	34	19	7	10	1	1	0	12	99	9	17	1	12	35	38					0	0	16	7	6	12	36	11	0	26	3	0	0	0
5	83	64	25	13	34	11	4	13	27	14	5	27	16	5	19	77	8	17	10	37	7	0	11	7	38	6	21	6	10	18	31					16	3	2	4	1	28	60	62	33	157	3	8	29	18
0	0	19	11	0	46	6	0	4	7	4	10	18	12	0	0	9	1	0	3	37	1	0	0	0	0	6	25	0	0	0	25					11	1	0	16	16	1	36	44	2	56	0	8	25	28
0	0	0	54	0	55	6	2	7	0	3	16	14	0	0	0	0	10	0	2	0	0	0	0	0	0	1	27	0	1	0	55					5	6	41	0	1	6	8	6	0	58	16	31	9	0
0	0	4	28	0	2	0	0	10	0	0	2	0	2	0	0	0	0	0	0	0	6	0	0	0	20	3	0	0	0	0	27					5	1	7	0	6	0	36	5	11	15	48	7	10	18
0	0	0	38	0	5	0	0	9	0	0	0	0	0	0	0	0	9	0	0	0	3	0	0	0	37	0	0	2	1	0	7					24	2	17	0	21	11	55	13	4	0	21	8	16	4
0	0	0	0	0	40	0	0	5	0	6	0	0	0	0	5	0	4	0	0	0	0	0	2	0	49	7	0	8	0	0	21					3	3	9	0	0	8	31	0	0	7	0	20	4	0
0	0	1	49	0	0	0	2	0	0	0	0	0	0	0	4	0	0	0	0	0	0	5	0	3	51	34	3	0	0	2	4					5	5	6	1	0	3	14	4	0	7	0	2	28	0
0	0	0	7	0	0	0	0	0	0	3	0	11	0	0	6	0	0	0	0	0	0	0	0	0	17	0	0	1	0	0	17					2	0	0	1	0	5	10	8	0	64	23	2	11	0
0	0	0	1	0	0	0	0	0	0	1	0	0	0	0	0	0	0	0	1	0	0	0	0	0	59	0	0	0	0	0	15					8	0	0	4	0	3	1	31	0	50	98	1	33	0
16	0	16	3	0	0	0	90	0	3	0	28	0	0	0	0	0	0	0	0	0	0	0	0	0	0	0	0	15	0	0	0					0	0	0	0	0	3	40	15	0	25	54	0	24	12
0	0	46	28	0	3	0	2	0	6	0	2	0	0	0	27	0	0	10	0	0	0	0	0	0	0	0	0	1	0	0	1					3	0	0	7	9	3	4	24	0	33	14	38	16	0
0	0	14	5	0	0	23	0	0	0	0	0	0	0	0	0	0	0	0	0	0	50	0	0	0	16	0	0	0	0	0	0					0	0	0	0	9	3	18	2	0	52	70	10	10	0
1	0	0	0	0	0	0	0	0	31	0	1	0	0	0	0	0	0	0	0	0	1	0	0	30	0	0	0	0	0	0	0					8	0	0	0	4	2	10	9	0	48	98	3	30	0
0	0	0	0	0	0	2	0	0	6	0	6	0	0	2	0	0	0	0	4	0	0	0	1	13	4	5	1	0	0	0	0					6	3	0	0	16	5	2	6	0	40	72	0	6	0
0	0	12	0	0	0	5	0	0	35	0	8	0	0	0	0	0	0	0	0	0	9	0	0	2	22	6	127	0	0	0	0					17	0	0	0	14	12	0	0	0	3	0	0	95	18
0	0	0	0	0	0	3	0	0	0	0	0	0	0	0	0	0	0	0	0	0	0	0	0	0	0	2	0	33	0	0	0					2	0	0	0	1	1	8	11	0	79	0	88	5	8
4	0	0	0	0	0	2	0	0	0	0	0	0	0	9	0	0	0	0	0	0	18	0	0	3	0	1	0	3	0	0	0					47	0	0	0	7	0	12	11	19	42	9	24	83	0
0	0	1	0	0	0	0	0	0	0	4	0	0	0	0	0	0	0	0	0	0	0	0	13	0	0	0	7	0	0	0	4					0	4	0	0	0	7	4	10	1	43	0	14	24	0
0	0	0	0	0	0	0	0	0	0	0	0	0	0	0	4	3	0	0	0	0	0	6	69	18	0	0	0	14	0	0	0					16	0	0	0	0	0	0	0	44	13	0	16	54	0
0	0	0	0	0	0	5	0	0	0	0	11	10	0	0	3	0	0	0	0	0	18	8	0	0	0	2	0	0	5	0	0					0	0	0	7	4	0	2	11	0	94	0	1	3	0
0	0	0	0	0	0	0	0	0	0	0	0	0	0	0	0	3	0	0	0	0	0	1	0	0	0	10	20	0	0	0	0					0	0	0	0	33	1	9	2	0	25	0	0	7	0
0	0	0	0	0	0	3	0	0	0	0	0	0	0	0	0	3	0	0	0	0	15	10	0	0	0	0	0	0	0	0	0					0	0	0	0	30	85	5	5	39	80	0	25	6	0
0	0	0	0	0	0	1	0	0	0	0	0	0	0	0	0	13	0	0	0	0	0	6	0	0	0	0	9	0	0	7	0					3	0	0	0	10	20	19	0	40	204	0	10	49	0
0	0	0	0	0	0	16	0	0	0	0	0	0	0	0	0	0	6	0	0	0	0	7	85	0	0	0	9	0	0	0	26					19	0	0	34	2	1	0	11	14	87	31	0	1	0
17	19	5	11	18	22	82	32	34	22	21	16	13	19	34	6	6	29	21	11	1	38	35	5	81	10	29	15	14	35	27	52					42	4	4	7	32	15	35	18	5	51	38	8	46	27
15	28	4	50	16	23	6	18	25	14	26	21	22	16	25	22	9	34	10	10	5	10	32	1	176	37	11	8	12	23	19	3					12	19	10	28	53	32	59	7	19	62	6	2	61	6
13	37	12	15	32	16	55	24	20	20	31	15	17	16	28	1	8	39	9	37	0	35	38	9	6	92	33	17	13	24	20	11					7	9	3	52	15	22	23	18	14	96	27	6	30	7
38	32	47	55	29	18	5	17	40	35	14	13	28	20	20	24	7	23	26	28	9	11	7	13	88	14	19	11	17	16	26	31					5	6	6	0	47	20	89	28	2	23	21	62	103	2
27	22	39	13	58	18	0	36	31	25	14	14	23	9	18	21	14	19	26	21	4	12	7	7	67	10	47	19	18	18	26	25					7	38	21	45	35	34	14	19	3	24	42	1	30	1
17	16	16	30	43	10	66	28	35	10	19	14	16	20	23	65	18	29	11	21	4	94	10	9	0	74	17	7	15	15	24	31					7	2	15	38	17	8	41	6	53	76	9	0	23	53
32	18	40	19	19	15	4	30	57	32	19	6	12	9	14	27	4	20	20	30	23	27	7	17	48	80	16	58	18	26	21	3					31	63	16	29	25	13	23	8	15	6	29	23	53	1
16	17	22	19	34	11	38	23	45	14	13	10	15	9	22	11	11	26	11	21	46	39	5	12	48	28	21	11	19	21	16	21					44	7	8	22	9	24	19	23	30	26	16	36	29	3
27	44	14	30	18	23	28	25	16	45	10	44	36	3	27	18	10	22	15	21	6	32	12	12	65	8	47	20	13	20	13	18					12	7	12	19	2	11	7	23	44	52	9	40	85	12
15	29	56	18	7	11	74	18	20	8	12	7	11	8	24	45	3	15	14	32	29	44	1	9	59	6	64	35	30	18	15	10					4	49	52	40	4	10	17	20	47	59	25	11	50	47
12	65	40	28	33	19	9	11	18	111	34	9	5	8	11	36	19	23	7	35	9	48	5	14	29	78	3	38	16	27	12	20					57	5	8	19	9	12	6	7	19	82	26	7	39	3
44	29	8	22	3	10	8	11	30	67	12	1	7	8	27	11	4	10	12	23	1	31	6	4	14	4	78	8	4	21	8	9					29	8	44	5	27	11	10	10	27	95	21	20	37	33
22	36	32	13	7	32	53	22	13	12	24	1	53	5	9	25	13	14	4	25	0	1	2	2	8	10	66	7	28	19	8	32					36	15	10	15	44	10	10	13	32	27	44	7	30	58
26	19	8	25	2	9	79	7	24	69	15	0	3	2	28	23	12	18	9	38	0	19	10	35	27	28	13	12	17	42	10	0					49	8	15	25	0	9	17	50	32	15	21	35	30	2
57	25	5	30	6	13	60	29	25	0	18	12	13	2	5	6	0	10	32	1	1	11	12	25	13	1	15	6	4	40	9	13					11	4	5	49	25	30	19	23	24	2	44	7	30	5
17	9	41	11	0	1	11	53	18	5	13	0	24	0	6	19	7	8	24	8	0	26	8	16	14	16	14	70	23	12	12	73					5	8	3	6	34	5	4	26	10	39	9	1	22	2
27	4	0	5	6	2	0	30	17	26	11	6	9	5	6	36	9	18	12	4	0	87	7	0	5	66	20	4	36	0	9	3					4	6	3	24	6	6	14	45	76	2	7	3	64	13
9	3	24	12	30	10	8	11	19	54	6	3	0	6	1	12	0	12	18	15	0	2	6	3	3	36	25	15	9	0	6	20					6	4	22	1	38	7	2	32	25	38	0	35	22	26
8	14	17	24	65	1	48	11	67	29	14	1	10	2	3	4	4	0	47	0	0	36	14	2	1	12	32	7	14	8	7	0					49	3	6	30	34	12	2	3	8	28	2	5	41	37
10	33	1	1	3	1	0	44	12	39	15	0	17	1	6	20	0	37	14	11	0	4	6	2	131	0	3	51	6	65	68	12					11	2	27	2	0	41	5	1	8	22	25	59	32	15
8	14	2	0	0	1	3	7	7	16	12	11	8	1	1	21	3	6	22	8	0	21	33	0	9	21	19	51	7	1	11	0					16	1	11	6	0	4	7	1	18	24	0	0	68	11
2	3	4	54	15	1	36	33	5	83	12	11	6	15	33	15	1	11	6	9	0	27	34	2	0	12	47	13	2	1	13	0					6	3	29	14	15	13	33	3	14	38	2	0	36	56
15	1	11	22	0	4	13	18	25	18	23	115	12	2	8	16	6	10	5	12	1	14	3	2	44	40	5	33	6	0	70	0					8	46	17	30	0	14	23	36	18	15	9	4	38	38
19	38	24	7	8	3	7	21	20	31	13	6	17	4	12	11	8	12	16	28	13	6	4	6	8	13	22	17	12	0	37	3					9	0	13	23	3	13	48	16	19	12	8	26	40	34
16	34	53	11	22	26	11	24	4	14	15	5	40	20	59	5	19	9	22	13	5	24	7	8	0	3	27	35	4	11	37	15					59	8	27	5	41	47	66	76	40	34	47	65	82	34
23	10	43	6	0	25	5	2	9	37	13	2	12	23	6	3	6	11	8	6	10	20	3	2	0	11	23	13	5	1	20	21					12	8	8	0	34	34	32	7	17	40	42	20	39	23
13	0	1	1	0	12	7	3	6	0	3	7	17	1	1	3	6	0	3	1	1	10	0	0	0	1	30	2	3	0	1	18					9	15	3	12	11	38	15	4	6	2	48	41	14	0
6	1	0	2	0	9	1	4	13	0	6	0	3	0	0	5	14	0	0	0	0	15	0	0	0	0	13	30	1	0	0	15					5	15	15	67	16	12	12	8	8	12	58	38	9	7
0	0	0	0	0	5	0	3	0	0	1	0	10	0	0	0	6	0	0	0	0	9	0	0	0	0	2	0	7	0	0	12					14	9	48	0	1	6	11	0	49	7	44	40	11	4
0	0	50	2	0	5	10	7	0	0	0	0	0	0	0	0	0	0	0	0	0	1	0	0	0	0	5	0	3	1	6	0					11	9	23	0	13	15	3	2	17	43	40	23	81	5
0	0	0	2	0	6	0	0	9	4	0	0	8	0	0	0	0	0	0	0	0	1	0	0	0	0	0	0	12	0	3	0					38	6	15	0	16	3	9	7	1	35	49	31	21	6
0	0	6	8	2	0	0	0	7	0	0	0	21	0	6	0	18	0	0	0	0	0	0	0	0	0	0	0	18	5	1	0					16	24	6	34	7	37	23	2	25	12	48	20	8	8
0	50	0	17	31	3	0	3	0	0	0	0	5	0	0	0	12	0	0	0	0	3	0	0	0	0	0	0	0	33	42	8					7	12	0	0	9	17	0	3	12	51	48	0	10	50
0	4	1	0	9	3	0	2	0	0	0	2	0	0	4	0	0	0	0	0	0	7	0	0	0	0	0	0	0	8	8	3					11	18	8	0	11	16	4	12	11	0	46	14	12	28
0	8	0	0	0	15	0	0	0	2	0	0	0	0	0	0	0	0	0	0	0	2	0	0	0	0	0	33	0	0	3	0					17	3	15	16	6	8	0	6	6	26	66	21	7	2
0	7	0	0	0	4	0	0	8	50	0	2	0	0	1	0	0	0	0	4	0	0	0	0	0	0	0	4	0	6	11	0					4	7	30	8	2	8	0	3	7	8	52	16	5	3
6	2	5	0	0	0	0	0	0	7	0	3	0	0	0	0	0	0	13	3	0	0	0	0	0	29	0	5	0	0	3	0					5	15	0	41	1	15	8	9	0	0	53	5	19	6
0	0	28	0	5	4	0	2	0	3	0	0	0	0	0	0	0	0	0	6	0	2	0	0	0	0	0	0	7	0	0	0					7	10	4	32	90	10	0	4	8	14	56	0	14	7
4	0	0	0	0	0	0	0	4	0	0	0	0	0	0	0	0	18	0	8	0	12	0	0	0	0	15	1	0	0	0	0					5	2	53	0	9	6	6	4	10	30	70	23	10	6
0	0	0	0	22	0	0	0	5	0	0	0	0	0	34	6	2	0	0	0	0	4	0	0	0	0	10	0	0	1	0	0					9	10	11	0	1	2	17	16	20	6	67	19	4	5
0	0	0	0	5	0	2	0	1	0	0	0	0	0	2	3	2	0	0	0	0	0	0	0	0	0	4	0	6	40	1	0					19	4	2	10	22	0	7	3	9	16	69	14	15	0
0	0	0	0	0	0	7	0	0	0	0	0	0	0	0	0	0	0	0	0	0	0	0	0	0	5	2	0	0	1	9	0					10	2	34	13	28	0	0	6	0	26	57	1	0	0
0	0	0	0	0	0	3	0	0	4	2	0	4	0	0	0	0	0	0	0	0	0	0	0	0	0	44	0	6	0	0	0					7	2	0	4	0	0	6	1	24	26	67	0	18	0
0	0	0	0	0	0	0	0	11	0	0	13	0	0	0	0	0	0	0	0	0	0	0	0	0	0	0	0	0	0	0	0					14	7	0	0	0	44	12	7	0	52	63	9	8	0
0	0	19	0	5	0	4	0	1	0	0	9	0	0	0	0	0	0	0	0	0	0	0	38	0	6	6	0	0	3	1	0					9	0	0	0	0	11	6	2	0	3	67	2	2	0
0	0	1	0	0	0	0	0	1	0	25	0	0	0	0	0	0	0	0	0	0	0	0	0	0	0	6	0	0	7	1	0					15	9	0	0	0	7	0	14	0	11	56	10	23	0
0	0	5	0	0	0	1	0	13	0	0	0	0	0	0	0	0	0	0	0	0	2	2	0	0	0	12	0	0	12	11	0					7	0	1	0	4	3	15	0	1	11	37	1	2	0
0	0	0	4	0	0	3	0	5	0	0	0	0	0	0	0	3	0	0	0	0	0	21	0	0	1	7	54	31	3	29	0					60	7	3	5	4	1	12	7	9	4	10	0	4	0
14	13	35	20	21	9	73	20	38	15	27	30	22	17	18	23	31	29	6	24	11	12	14	10	31	9	29	7	21	39	34	16					20	7	25	10	9	63	12	22	23	35	0	10	23	57
20	10	66	15	26	12	115	18	41	25	31	25	22	21	27	14	47	27	23	35	7	12	4	65	37	11	30	34	18	12	19	12					7	24	33	94	2	22	20	60	10	11	0	8	20	27
17	16	13	25	16	11	7	26	21	21	19	21	20	11	30	31	20	16	21	23	1	13	33	22	10	13	26	16	22	41	12	14					9	20	45	39	4	25	17	30	17	26	0	11	23	11
9	14	18	40	39	17	1	16	20	9	22	25	20	9	24	17	13	23	25	20	46	26	37	9	17	26	7	27	13	18	21	8					10	47	18	31	3	24	40	14	5	11	0	4	54	22
16	6	15	17	16	14	13	14	24	24	16	45	13	8	16	72	17	23	13	23	4	21	19	42	31	14	7	14	18	27	57	5					43	20	17	24	4	23	18	39	13	33	0	33	31	26
17	19	69	8	21	13	115	19	21	31	29	12	16	5	12	9	11	15	22	23	3	22	19	11	36	21	11	12	9	31	16	6					15	11	19	38	5	18	15	25	15	12	0	5	36	52
19	15	13	53	10	15	13	32	12	5	32	12	12	7	23	33	16	13	20	20	14	29	8	11	22	14	27	25	8	41	18	9					8	35	22	62	4	17	49	40	26	32	0	32	45	8
10	5	10	11	19	16	9	30	25	33	24	5	14	42	17	8	27	26	17	51	34	20	6	7	36	8	8	10	10	24	10	6					6	5	24	66	1	22	8	14	45	108	0	14	56	24
7	28	15	13	80	17	25	13	26	32	15	1	17	6	22	12	20	18	22	9	97	29	26	6	41	8	1	9	7	15	7	6					3	27	21	23	33	15	24	11	30	18	0	2	69	36
10	23	56	9	4	13	28	21	32	7	9	13	7	8	19	4	6	25	12	47	2	30	21	6	7	4	0	20	15	16	15	10					4	17	24	63	3	50	13	44	12	18	0	9	75	12
10	3	19	31	26	11	25	13	28	24	38	9	7	3	21	18	14	17	14	3	3	36	21	5	11	22	24	21	20	50	4	6					17	26	12	12	8	11	13	29	30	19	0	14	63	21
6	10	82	16	0	9	67	2	20	11	5	0	4	6	35	31	0	151	0	7	0	25	6	6	3	44	72	25	6	15	41	13					6	31	15	2	12	11	17	7	22	3	0	7	62	4
2	8	31	12	2	9	25	9	22	5	5	7	7	4	13	15	3	4	13	0	14	40	3	15	31	10	7	9	10	26	4	0					12	21	45	2	1	11	29	27	14	76	0	0	57	11
21	5	14	6	12	11	24	15	15	4	2	20	5	1	10	25	16	4	16	7	0	30	17	20	56	77	10	32	3	48	20	0					5	8	9	3	6	12	7	16	14	51	0	50	49	2
5	6	11	0	5	2	26	9	12	7	0	17	28	2	44	19	0	4	2	0	19	38	21	7	23	53	27	49	22	7	14	15					6	5	9	2	2	9	5	12	34	2	0	2	4	0
5	42	8	0	10	4	8	39	9	6	5	29	0	10	4	5	2	5	14	1	8	25	2	3	46	48	16	22	35	10	3	0					2	6	33	11	0	8	21	27	21	11	0	16	0	10
9	1	47	0	6	2	0	14	18	0	4	2	4	7	19	7	0	7	12	5	3	45	8	9	11	7	7	62	14	27	48	0					3	6	9	4	0	9	13	2	28	0	0	21	0	0
20	6	28	0	4	3	4	13	5	4	11	57	2	16	13	10	37	10	0	1	0	34	7	2	5	13	2	15	15	2	1	1					10	2	6	15	7	8	2	33	24	140	0	0	0	4
6	2	5	6	25	0	1	45	22	8	2	0	20	2	6	23	3	53	10	19	0	35	2	0	50	0	3	24	4	5	5	1					8	12	5	0	11	6	8	14	33	0	0	2	0	37
3	6	5	0	3	4	0	23	18	17	5	0	7	15	2	38	7	7	0	2	5	8	5	2	0	4	2	30	0	9	5	0					3	19	8	0	10	6	4	3	44	0	0	1	0	0
13	11	33	4	4	3	5	41	19	13	23	2	12	10	9	3	25	20	1	20	1	0	1	0	7	8	12	38	7	3	9	0					3	2	12	0	16	4	14	0	43	50	0	2	0	31
2	65	2	14	15	8	6	6	19	42	12	11	37	6	18	12	13	4	6	21	0	0	0	3	0	2	3	114	18	0	2	0					0	0	15	0	1	6	31	0	41	0	0	5	0	0
4	4	18	5	0	1	0	14	32	9	9	4	8	4	2	6	5	14	17	7	4	0	44	2	16	20	1	27	24	0	8	6					0	1	14	8	1	16	28	0	45	17	0	10	0	0
12	71	4	0	3	2	21	16	20	8	14	11	10	4	3	2	18	13	14	6	2	0	7	4	19	7	7	10	9	40	10	15					0	7	16	8	12	24	40	7	36	29	0	8	0	9
51	11	29	2	7	12	5	17	33	18	8	22	41	14	8	9	34	34	19	5	18	0	12	9	12	5	6	24	23	10	24	26					40	9	21	49	22	52	66	45	18	26	0	62	0	9
16	32	18	1	20	13	2	7	27	12	9	29	22	20	2	1	7	34	31	5	11	0	0	10	10	3	10	29	21	15	35	17					2	21	25	0	10	38	61	4	0	20	0	26	0	1
12	4	76	1	27	11	0	11	39	4	0	0	43	8	3	2	9	6	26	0	8	0	3	8	7	0	7	20	11	0	17	19					3	36	12	0	9	17	17	0	0	6	0	26	0	3
19	21	11	2	0	19	0	9	32	2	0	0	38	1	0	0	6	5	0	0	0	0	0	0	7	0	0	37	7	0	1	12					6	10	8	26	2	7	31	3	0	17	0	35	0	6
12	8	13	0	1	8	3	2	42	4	4	0	22	0	0	0	3	0	0	2	0	0	0	0	0	0	2	5	5	0	0	14					14	12	1	4	13	13	1	15	0	61	0	33	0	0
5	4	1	0	0	4	2	3	39	4	0	0	18	0	1	0	0	0	0	0	0	0	0	0	0	0	0	9	8	0	0	0					8	4	0	23	9	22	10	2	0	42	0	13	0	4
9	13	12	3	0	7	0	4	38	2	0	0	1	0	0	0	0	0	0	0	0	0	0	0	0	0	9	0	2	0	0	0					5	5	3	26	49	12	0	6	0	2	0	25	0	20
8	16	10	0	0	3	2	4	51	0	0	0	15	0	2	0	0	0	0	0	0	0	3	0	10	0	0	5	0	0	0	0					10	9	0	0	17	36	7	3	0	13	0	30	0	3
13	23	2	0	0	0	3	0	32	0	0	0	0	0	2	0	0	0	0	0	0	0	0	0	0	0	0	0	0	0	0	4					10	14	0	6	8	15	16	16	0	25	0	8	0	4
18	20	5	0	0	0	0	0	34	0	0	0	39	0	11	0	0	0	0	0	0	0	0	0	0	0	0	13	2	0	0	2					10	1	0	5	7	5	7	15	0	18	0	3	0	9
19	46	8	0	0	0	5	0	32	0	5	0	4	0	1	0	6	0	0	0	0	0	0	0	0	0	24	1	3	0	0	0					9	8	0	3	2	3	13	4	0	17	0	0	0	3
23	26	0	0	0	0	0	0	37	1	0	0	0	0	1	9	0	0	0	0	0	0	0	0	0	1	2	5	0	0	0	65					5	6	0	0	15	13	4	10	0	11	0	4	0	8
13	28	0	0	0	0	1	0	38	3	0	0	0	0	0	0	0	0	0	0	0	0	0	0	0	0	9	0	0	0	0	16					6	7	0	13	0	1	0	5	0	51	0	0	0	5
11	23	0	0	0	0	6	2	40	3	0	0	0	0	0	0	0	0	0	0	0	0	5	0	0	0	3	0	0	0	0	24					10	8	0	0	0	18	0	0	0	1	0	0	0	6
18	26	26	1	0	0	0	2	30	0	0	0	2	0	0	0	0	0	0	0	0	0	8	0	0	0	3	0	0	0	8	0					3	6	0	14	4	8	10	9	0	6	0	0	0	7
27	23	2	0	0	0	0	0	28	0	0	0	16	0	0	0	0	0	0	0	0	0	28	0	0	0	0	0	0	0	0	0					17	2	8	14	0	5	6	0	0	2	0	9	0	14
40	34	69	0	0	0	3	0	40	0	0	0	13	0	1	0	0	0	0	0	0	0	0	1	0	115	0	0	0	0	0	0					10	1	11	7	41	7	27	5	0	3	0	16	0	1
27	43	2	1	0	0	0	0	20	0	0	12	0	0	8	3	6	0	0	0	0	0	0	2	0	33	0	0	0	3	0	1					5	2	2	5	17	3	22	3	0	67	0	11	0	14
32	27	3	3	0	0	0	0	0	1	0	7	0	0	5	0	0	0	0	8	0	0	0	0	0	0	10	0	8	0	2	1					6	2	35	20	0	0	5	1	0	9	0	4	0	2
38	41	17	0	0	0	0	0	0	2	0	1	0	0	0	0	0	0	0	16	0	0	0	0	0	3	0	8	11	0	0	0					4	4	18	12	0	44	10	25	0	7	0	19	0	14
33	29	52	0	0	0	0	4	0	0	11	3	0	0	0	0	0	0	0	0	0	0	0	0	7	0	0	0	0	0	0	8					3	1	26	0	0	3	0	5	0	60	0	55	0	37
octβ2Rf05679/Df
DMSO																																			100 uM Amitraz
23	14	18	29	35	25	14	22	21	64	4	19	13	7	39	38	35	19	22	9	18	52	43	3	55	34	18	16	4	86	35	45					0	18	1	7	21	17	35	7	4	11	2	40	0	0
32	8	47	29	28	25	8	27	39	39	16	26	7	3	36	28	26	10	20	10	8	87	40	13	46	36	14	32	11	50	11	81					0	13	9	1	3	28	8	0	0	0	14	28	0	0
14	10	28	46	8	16	7	9	39	53	14	57	0	2	33	29	34	27	49	3	2	19	2	2	41	36	4	69	9	26	5	37					6	4	0	27	8	33	10	0	0	43	9	45	0	0
24	0	29	56	23	16	1	20	12	17	18	21	1	5	22	22	28	23	8	32	2	16	97	68	51	24	5	18	0	44	0	24					8	23	11	0	7	33	14	0	0	0	7	29	0	0
9	1	16	42	2	21	4	43	5	35	15	11	10	4	12	24	15	2	10	1	0	44	26	9	27	13	7	6	0	20	11	39					6	8	9	1	32	15	8	0	0	0	5	29	0	0
5	0	19	22	0	14	0	10	9	57	18	14	7	7	9	18	15	0	0	30	0	20	20	58	31	7	2	31	0	11	2	31					1	26	13	6	17	18	9	8	0	21	26	39	0	0
4	3	20	18	0	17	7	0	11	20	10	14	1	11	7	32	11	30	0	4	6	1	28	1	14	13	3	10	3	8	1	20					7	17	1	0	7	19	9	0	0	0	6	24	0	0
3	3	12	27	5	11	1	46	9	6	8	15	5	5	28	26	20	5	27	25	0	3	18	11	16	22	2	0	0	7	1	17					2	21	27	19	22	42	11	0	0	0	15	17	0	0
10	0	12	17	0	81	2	9	6	0	11	19	0	3	7	21	8	0	0	30	1	8	30	22	21	18	1	15	0	5	0	23					15	4	0	3	3	12	0	0	0	3	20	27	0	0
2	8	19	27	13	31	0	4	5	6	13	12	2	6	9	15	41	7	29	1	3	9	0	11	32	38	13	17	0	2	0	38					6	3	0	0	3	22	0	0	17	1	19	16	0	0
6	0	9	9	4	30	0	19	20	5	8	11	0	15	12	57	6	0	0	6	2	20	14	21	27	20	3	10	0	9	30	28					2	7	22	8	3	14	0	8	0	0	19	19	0	0
2	0	2	10	2	12	1	2	16	6	0	7	0	8	8	33	55	13	3	8	0	3	0	13	31	15	28	3	0	5	7	23					16	3	36	0	25	19	14	12	2	3	21	19	0	0
1	0	10	29	1	14	6	6	10	11	0	6	0	8	11	7	27	1	9	3	0	2	70	5	13	29	5	11	0	5	4	35					1	5	0	6	15	26	7	0	0	2	17	20	0	0
1	0	3	12	0	9	7	2	2	8	0	0	0	12	16	12	4	0	1	0	1	2	1	3	12	9	8	1	0	1	4	13					6	1	18	3	4	11	2	8	0	5	18	18	0	0
2	3	9	22	3	27	9	15	20	35	2	8	13	2	16	13	8	7	0	3	6	50	0	12	16	51	0	28	3	0	0	15					15	13	0	10	27	30	13	0	6	4	12	16	0	0
3	1	10	8	0	11	0	20	0	3	0	6	0	4	5	5	39	8	0	20	1	1	63	2	14	20	8	2	2	25	3	11					3	25	0	27	6	25	17	13	7	2	15	37	0	0
9	0	20	3	0	15	6	25	3	0	2	24	0	3	6	15	2	45	0	0	0	4	21	12	7	29	7	0	1	16	4	20					14	11	0	5	5	30	25	17	3	9	23	22	0	0
0	0	8	14	0	8	9	4	25	46	1	0	0	7	6	2	0	23	0	19	0	3	5	1	18	45	8	9	0	1	6	62					10	15	12	18	4	11	21	5	2	17	15	15	0	0
12	0	21	23	20	15	2	38	20	42	12	4	0	11	2	25	15	18	48	0	48	33	27	0	7	24	8	3	2	0	1	69					8	12	0	9	0	30	0	2	7	32	11	12	0	0
4	0	6	6	3	11	0	2	7	2	8	28	2	3	8	10	11	10	5	0	5	0	9	3	59	7	7	7	3	11	13	39					9	19	21	10	0	30	4	5	5	5	18	24	0	0
1	0	5	7	11	26	0	18	13	14	15	7	1	3	4	6	10	29	2	0	6	2	7	0	27	49	5	0	0	13	9	25					4	13	2	13	3	48	0	2	5	30	19	28	0	0
5	0	2	9	0	5	3	5	3	10	3	0	0	4	13	5	9	9	41	14	6	5	10	22	41	17	9	0	0	36	11	0					22	6	1	30	27	16	0	13	5	16	19	22	0	0
60	1	0	11	1	7	0	18	3	30	9	0	3	5	2	2	2	5	6	1	0	4	1	21	20	19	3	0	1	4	2	2					6	11	1	25	72	28	0	5	2	7	15	14	0	0
3	0	1	5	0	30	0	10	6	7	0	1	0	6	0	5	1	33	24	0	0	6	3	3	10	12	3	29	0	6	3	8					26	4	0	8	20	41	0	0	12	4	23	13	0	0
12	7	15	39	21	32	47	40	34	60	15	24	0	12	28	28	43	40	38	58	9	29	41	62	58	58	14	33	17	35	39	42					30	23	2	14	6	10	41	49	64	19	15	37	0	0
4	4	19	41	18	14	44	29	20	46	7	25	0	27	0	31	33	42	20	19	15	22	37	31	48	41	14	27	7	29	37	28					12	25	9	5	13	13	29	37	43	49	25	27	0	0
4	12	12	33	18	36	26	28	28	34	16	24	0	25	0	37	16	54	18	14	22	19	18	20	33	29	9	19	13	30	31	18					21	27	2	4	9	25	18	17	45	42	29	29	0	0
10	14	22	36	21	25	28	18	19	25	12	16	13	23	0	20	29	29	11	23	10	19	11	25	44	24	21	25	23	24	28	34					24	20	43	5	8	38	18	20	38	34	22	27	0	0
12	26	10	32	12	25	17	23	13	30	8	21	8	11	0	13	15	11	5	15	3	4	4	18	34	21	17	22	42	19	20	11					25	14	0	11	12	56	13	24	31	45	24	26	0	0
3	22	9	31	20	47	18	37	14	26	8	21	14	9	0	18	11	15	13	11	3	5	52	25	32	22	10	16	29	18	21	57					24	11	0	15	46	45	18	16	35	27	31	32	0	0
2	9	12	34	22	17	18	50	3	32	14	25	3	10	0	13	19	29	13	21	1	20	5	26	27	26	17	18	9	17	29	19					22	0	12	10	13	63	15	16	40	47	24	34	0	0
10	38	11	20	8	22	11	21	19	32	21	55	0	18	0	14	19	21	23	9	0	14	26	28	21	16	50	13	7	10	16	8					31	0	2	15	24	40	10	5	31	31	17	32	0	0
11	10	14	20	26	11	21	14	30	14	12	19	7	17	0	20	20	11	12	11	7	0	25	15	24	15	23	31	8	16	16	31					47	0	1	6	7	48	12	15	23	35	20	36	0	0
6	18	2	7	13	16	17	12	16	16	10	12	0	15	0	19	14	7	13	5	4	8	24	9	21	27	5	6	12	4	2	16					10	0	0	10	8	50	9	6	15	37	27	28	0	0
11	4	2	5	26	18	9	5	31	9	10	10	2	7	0	12	17	8	11	9	8	4	2	1	20	14	10	7	14	4	12	15					10	0	16	7	15	51	9	28	14	36	12	36	0	0
9	17	12	18	4	18	7	16	18	8	7	9	3	15	0	14	4	16	6	4	0	16	35	1	10	5	14	10	4	11	37	38					42	0	0	16	9	49	9	31	2	24	13	48	0	0
8	9	9	7	6	24	10	8	6	16	4	11	0	16	0	3	36	8	2	2	20	0	26	3	11	14	8	75	9	0	0	6					55	0	6	11	15	46	8	20	0	38	25	34	0	0
16	9	10	11	0	47	7	15	22	5	6	14	6	16	0	10	7	19	7	15	2	0	9	0	27	18	11	24	0	5	9	21					38	0	5	8	9	55	17	0	3	37	27	40	0	0
2	16	1	4	6	21	20	0	21	10	6	13	1	8	0	8	4	25	5	6	3	0	12	13	10	20	6	2	0	8	0	16					29	0	37	5	23	53	11	6	0	32	20	43	0	0
5	43	4	11	0	20	9	10	14	6	6	8	0	8	0	17	4	7	12	6	0	0	40	1	26	14	7	10	12	6	16	9					12	0	1	27	12	46	11	8	0	26	19	41	0	0
5	13	11	17	4	12	4	24	14	7	6	12	0	8	0	4	3	15	9	17	2	13	18	13	30	14	21	1	12	3	7	1					22	0	7	1	22	49	21	2	4	32	24	48	0	0
19	66	18	9	0	18	7	2	2	7	4	14	0	12	0	5	5	8	20	5	2	2	1	11	18	16	16	2	12	10	0	0					20	0	4	5	14	58	25	0	0	38	30	44	0	0
18	17	9	21	2	26	9	14	12	6	5	14	4	15	0	2	6	10	10	2	35	0	6	44	15	10	13	15	6	11	0	2					27	0	0	13	15	56	28	4	0	40	36	45	0	0
1	12	9	13	13	22	8	16	8	4	10	14	0	18	0	5	7	29	4	9	0	2	12	6	23	6	9	0	4	7	6	4					17	0	16	5	19	57	17	6	3	40	30	53	0	0
5	20	22	10	32	16	12	23	18	5	2	8	5	16	0	3	16	17	38	8	1	2	4	3	40	11	16	7	3	3	11	3					22	0	1	7	17	56	11	4	4	38	31	41	0	0
3	28	1	14	20	16	14	2	4	12	7	9	0	9	0	11	26	9	15	23	1	10	28	5	21	8	10	22	11	9	11	14					32	0	0	7	38	63	15	41	11	40	32	48	0	0
15	35	12	17	10	14	14	11	19	11	5	9	0	8	0	13	9	32	17	14	17	8	11	1	41	5	42	6	11	22	15	6					40	0	8	4	21	63	28	23	34	42	35	57	0	0
11	22	3	48	7	10	12	20	26	19	7	15	3	15	0	16	2	35	12	25	24	6	7	36	34	6	13	29	15	20	26	9					49	0	7	4	25	60	44	29	42	48	53	56	0	0
16	21	5	42	15	16	17	26	18	16	21	31	2	21	0	11	19	19	28	29	11	20	12	13	54	17	8	32	1	14	19	7					54	0	6	5	40	79	61	22	64	56	64	63	0	0
14	10	3	50	14	15	9	17	23	26	26	31	1	28	0	19	29	40	14	27	2	36	15	20	32	54	9	54	6	17	27	23					25	0	2	12	25	62	13	28	22	43	46	48	0	0
6	15	7	24	7	9	6	25	14	21	10	32	1	9	0	27	22	27	8	16	6	32	4	16	56	53	17	30	6	28	23	39					19	0	26	13	5	64	12	5	6	22	42	44	0	0
6	4	4	35	11	17	10	47	38	24	15	5	0	21	0	11	23	12	7	7	17	31	2	9	28	66	23	44	14	21	17	39					36	0	11	10	5	65	19	1	16	26	37	52	0	0
15	21	3	26	24	18	25	13	23	15	12	31	10	36	0	27	26	7	0	14	3	26	5	3	41	54	27	18	0	20	25	24					11	0	0	18	40	50	19	3	32	22	37	35	0	0
19	3	9	12	9	25	15	6	11	40	113	11	0	18	0	25	15	3	0	2	2	8	1	21	37	31	14	10	4	24	84	19					16	0	16	27	46	40	8	0	15	18	42	43	0	0
15	5	17	13	8	11	2	23	11	10	6	0	0	7	0	25	23	23	0	7	0	6	2	14	22	44	29	10	6	24	14	57					7	0	9	12	24	39	33	14	23	20	45	38	0	0
18	9	2	11	49	13	6	45	1	7	55	0	1	0	0	12	33	17	4	4	13	0	0	0	26	37	6	18	7	12	9	17					39	0	11	24	30	56	13	4	21	31	40	34	0	0
6	4	4	29	4	28	2	2	11	35	13	35	0	6	0	23	17	21	0	17	31	6	0	3	20	104	14	0	4	15	16	6					14	0	10	15	16	39	16	0	21	24	34	50	0	0
7	3	3	13	33	17	2	4	5	5	15	7	0	18	0	23	12	20	0	20	1	13	13	14	22	51	14	10	4	25	1	10					16	0	7	15	35	52	17	0	19	22	35	37	0	0
11	1	2	6	6	31	2	7	16	7	22	9	0	8	0	17	9	0	0	0	11	13	0	2	31	44	9	15	0	10	4	9					17	0	7	8	39	60	12	2	19	30	37	50	0	0
11	2	10	32	5	13	3	17	21	8	7	1	0	12	0	53	23	1	12	0	14	29	0	6	15	45	13	43	3	14	0	16					14	0	20	4	28	49	7	0	25	32	32	33	0	0
8	29	0	7	4	7	4	1	8	2	6	26	0	19	0	27	6	9	0	2	0	2	0	0	30	36	16	10	4	6	2	16					23	0	6	10	5	48	7	12	19	39	30	50	0	0
9	19	6	0	6	7	4	6	3	29	7	13	0	17	0	36	38	6	0	0	3	18	5	0	18	47	5	10	9	8	30	26					18	0	25	10	25	44	25	12	21	32	34	40	0	0
18	5	8	13	3	5	1	22	2	9	6	18	0	17	0	17	7	10	9	0	0	15	18	4	13	28	19	24	2	10	12	20					18	0	18	19	14	38	14	0	17	29	42	36	0	0
5	15	2	19	6	11	2	11	2	12	9	23	0	14	0	19	5	9	0	0	2	9	0	0	17	42	0	6	9	18	6	5					20	0	17	7	36	49	5	0	15	35	49	21	0	0
5	2	20	10	29	12	4	14	24	9	8	30	0	17	0	14	6	6	0	4	2	0	40	6	5	28	10	6	2	8	27	7					18	0	8	0	16	34	12	17	12	45	33	23	0	0
3	0	23	17	9	7	2	2	4	1	8	15	0	13	0	18	18	11	0	0	2	5	0	0	9	44	13	15	0	10	6	22					10	0	12	0	16	44	11	0	19	29	30	69	0	0
0	1	3	56	0	37	19	31	5	13	5	14	1	21	0	20	2	3	0	0	0	5	92	0	15	74	9	5	0	15	29	13					21	0	24	0	16	51	15	0	15	24	40	36	0	0
25	5	1	9	0	13	2	24	0	7	19	16	0	16	0	14	5	3	0	0	7	1	30	2	9	34	13	0	4	19	8	0					13	0	20	0	16	31	15	0	16	27	37	32	0	0
4	4	3	10	3	13	0	19	0	9	7	21	0	11	0	23	4	0	0	0	9	12	26	0	7	44	18	18	3	10	11	5					21	0	22	0	27	44	13	6	19	21	34	26	0	0
22	0	0	25	23	13	7	35	9	16	10	2	0	9	0	13	13	0	0	12	23	21	7	0	41	34	36	0	7	11	7	31					18	0	14	0	2	38	5	5	13	23	28	20	0	0
6	0	4	28	0	5	5	24	12	0	9	19	7	10	0	23	1	22	0	3	2	4	31	13	48	23	15	9	3	10	1	14					9	0	14	0	4	37	3	0	7	16	26	26	0	0
2	0	2	17	9	9	8	9	2	16	2	16	0	4	0	18	8	5	0	0	2	1	16	5	18	21	4	3	4	11	0	18					14	0	11	27	3	34	21	0	14	24	28	21	0	0
8	4	5	20	39	26	29	47	17	45	9	38	0	4	0	33	32	32	35	9	5	20	7	22	30	27	16	32	10	30	32	21					57	0	15	0	26	25	67	34	97	41	41	37	0	0
4	3	3	30	50	11	19	37	5	37	18	33	0	0	0	32	20	36	9	5	6	19	9	16	29	15	31	18	7	22	25	21					47	0	18	0	22	20	31	22	67	32	29	58	0	0
4	1	14	36	29	25	25	28	11	32	12	32	0	0	0	32	22	37	7	9	11	19	23	25	25	21	18	24	16	18	20	24					39	0	19	0	21	46	33	38	59	36	26	58	0	0
3	1	0	49	18	12	21	22	11	31	11	35	0	0	0	29	18	33	15	13	11	19	11	31	27	18	36	30	14	22	21	30					33	0	7	0	24	42	34	30	64	34	25	50	0	0
0	0	0	33	12	13	26	18	13	22	12	43	0	0	0	21	18	19	4	2	12	17	5	11	29	16	24	26	21	17	19	47					34	0	8	0	29	44	35	21	61	30	27	46	0	0
9	1	4	16	16	12	8	22	2	22	10	20	0	0	0	17	64	12	6	3	15	21	8	5	26	14	24	32	20	17	0	15					34	0	5	0	14	41	27	14	63	30	22	33	0	0
4	35	13	46	34	23	27	8	14	25	15	43	0	0	0	18	19	13	11	6	0	7	8	7	24	26	24	23	11	23	0	47					27	0	2	0	16	45	38	12	65	39	30	51	0	0
4	2	6	12	44	12	12	26	10	22	11	34	0	0	0	18	11	17	1	8	0	15	20	10	18	34	11	12	10	15	10	11					17	0	9	0	15	34	30	11	57	39	29	45	0	0
11	6	24	35	19	12	4	59	5	4	10	28	0	0	0	13	6	31	2	2	3	8	4	18	17	2	21	24	10	12	12	14					19	0	3	0	14	36	27	15	56	36	20	31	0	0
14	3	0	41	22	16	12	6	7	13	11	29	0	0	0	23	5	12	5	12	1	10	6	12	24	9	27	18	9	16	6	32					24	0	19	0	10	37	23	11	33	32	21	52	0	0
5	4	0	22	3	10	4	10	3	10	20	22	0	0	0	6	2	12	11	0	3	11	2	12	15	13	11	8	18	9	4	75					19	0	2	0	6	38	19	11	33	36	16	47	0	0
0	3	6	24	4	20	11	6	22	11	14	15	0	0	0	9	8	13	2	4	17	16	6	4	16	20	16	4	7	8	30	13					20	0	0	0	6	30	16	10	27	48	34	33	0	0
12	14	19	27	21	10	7	9	2	13	12	14	0	0	0	15	1	6	7	0	2	7	4	2	11	21	16	12	15	21	24	17					24	0	9	0	14	34	15	15	29	26	12	38	0	0
2	5	8	37	19	9	11	5	9	11	3	12	0	0	0	12	6	16	0	6	1	12	14	3	6	33	11	8	14	10	8	17					26	0	2	0	11	41	19	9	26	32	21	47	0	0
8	7	2	33	8	13	13	33	12	7	11	7	0	0	0	11	4	10	5	0	6	8	6	2	12	20	9	5	12	6	11	47					20	0	4	0	7	28	18	10	26	28	11	44	0	0
0	6	11	36	5	11	19	5	45	10	6	12	0	0	0	5	33	6	9	0	19	4	5	0	8	10	6	8	20	7	12	44					21	0	5	0	8	36	19	3	20	28	19	45	0	0
7	37	0	17	11	9	5	20	5	8	2	14	0	0	0	9	15	17	2	7	13	4	11	2	11	15	19	0	20	7	5	19					22	0	8	0	12	32	17	8	23	28	10	50	0	0
2	28	0	44	11	12	12	4	9	4	12	18	0	0	0	48	2	15	26	3	0	1	25	0	12	18	16	16	10	14	4	10					22	0	2	0	3	35	17	10	18	27	11	55	0	0
0	11	5	45	4	10	20	15	24	2	3	21	0	0	0	12	8	36	0	1	14	9	13	3	9	24	24	5	17	9	5	15					27	0	4	0	8	32	14	12	25	24	14	41	0	0
0	36	1	21	0	4	22	0	4	4	25	13	0	0	0	11	26	12	7	8	15	4	19	2	14	21	10	9	9	7	5	21					27	0	9	0	7	33	17	11	28	27	20	51	0	0
1	10	1	22	4	23	15	15	5	9	8	13	0	0	0	8	20	15	4	1	4	4	36	0	24	17	16	14	13	12	10	13					29	0	8	0	11	32	19	17	32	23	8	45	0	0
4	15	16	20	12	21	8	6	10	6	4	16	0	0	0	6	8	18	1	0	19	0	32	8	28	35	13	20	12	21	1	27					32	0	6	0	8	44	29	14	38	27	9	64	0	0
18	11	2	66	12	6	8	17	15	9	14	24	0	0	0	14	10	9	20	14	24	6	27	5	23	58	12	18	9	23	9	39					37	0	14	0	11	35	24	16	41	38	21	45	0	0
2	13	0	37	7	12	8	14	23	10	10	44	0	0	0	6	6	8	18	6	6	7	19	1	32	6	10	18	17	24	17	32					39	0	12	0	16	47	38	22	62	30	28	51	0	0
3	17	0	21	3	11	14	22	14	21	9	32	0	0	0	14	11	18	21	27	13	30	24	17	31	63	34	40	19	13	10	30					50	0	34	0	42	52	55	20	78	35	39	90	0	0
0	22	0	29	6	12	15	30	22	23	18	39	0	0	0	22	17	8	25	6	15	28	25	28	40	44	21	70	5	28	12	40					33	0	22	0	10	44	24	26	39	32	31	45	0	0
0	11	0	61	10	48	10	10	16	24	15	51	0	0	0	23	20	36	3	15	20	27	34	14	34	35	22	34	29	26	17	42					31	0	25	0	4	47	20	37	29	35	29	85	0	0
10	13	0	22	6	13	3	20	46	20	31	26	0	0	0	24	8	26	4	14	17	31	21	7	45	27	15	37	10	10	6	30					23	0	24	0	8	63	22	13	16	21	27	54	0	0
0	11	0	38	10	3	26	13	14	14	22	34	0	0	0	33	13	37	4	21	10	32	30	15	33	19	21	61	6	13	52	59					28	0	17	0	37	36	13	36	15	28	37	42	0	0
0	9	0	23	33	10	12	12	13	13	35	39	0	0	0	32	6	37	0	23	4	42	22	13	24	67	23	38	15	20	26	13					30	0	31	0	7	28	15	8	27	28	23	52	0	0
0	0	0	28	10	10	8	7	22	4	27	41	0	0	0	19	9	18	0	0	15	12	21	8	21	38	11	43	6	17	19	38					27	0	38	0	10	34	9	14	15	22	40	74	0	0
3	0	0	27	48	9	0	14	0	6	18	23	0	0	0	19	8	2	3	0	5	19	18	23	25	18	22	45	7	12	16	22					28	0	22	0	5	22	23	21	33	27	44	45	0	0
1	0	0	26	0	10	0	11	0	23	36	24	0	0	0	13	4	18	2	7	15	16	25	19	31	17	15	63	0	14	17	41					22	0	24	0	12	29	37	25	31	22	29	56	0	0
1	0	0	20	1	3	11	63	21	17	43	44	0	0	0	15	13	8	0	0	16	16	15	14	53	72	22	32	0	23	17	16					21	0	43	0	34	34	32	6	35	28	32	58	0	0
0	17	0	25	11	5	6	7	20	14	27	21	0	0	0	11	2	12	0	0	22	13	8	8	40	88	24	58	0	15	20	45					25	0	47	0	10	29	10	11	20	16	39	54	0	0
0	1	0	20	14	8	9	22	2	11	37	13	0	0	0	17	2	2	0	14	8	23	2	3	19	21	19	57	0	10	14	54					26	0	24	0	30	44	13	4	31	13	30	46	0	0
0	9	0	29	24	10	31	11	19	13	78	14	0	0	0	18	6	14	4	3	1	18	0	2	16	3	3	27	0	19	19	54					29	0	43	0	28	22	9	4	12	12	32	52	0	0
0	4	0	44	2	5	21	22	17	11	1	10	0	0	0	19	12	30	4	15	3	14	0	8	10	46	11	58	0	27	28	6					32	0	27	0	63	18	11	10	40	11	29	61	0	0
3	3	0	16	2	2	19	33	4	32	16	14	0	0	0	11	3	18	0	0	4	24	0	18	41	14	24	44	0	24	27	0					32	0	28	0	18	22	7	14	15	19	25	68	0	0
2	1	0	23	47	4	4	9	47	8	16	5	0	0	0	28	12	10	2	0	6	18	0	4	20	20	23	40	0	12	29	8					24	0	42	0	5	29	15	0	19	5	34	44	0	0
0	0	0	40	7	16	9	25	17	11	19	7	0	0	0	35	3	4	0	3	17	14	0	9	17	22	29	30	0	5	24	9					31	0	41	0	7	36	14	8	16	7	32	43	0	0
0	7	0	1	4	0	0	35	12	2	14	0	0	0	0	17	4	0	0	0	3	32	0	0	14	164	16	38	0	9	15	0					50	0	24	0	20	19	10	0	23	12	39	53	0	0
0	1	0	11	4	4	9	5	0	1	49	12	0	0	0	15	8	16	0	0	4	20	0	0	18	209	13	27	0	8	42	0					54	0	41	0	39	30	24	2	20	2	37	47	0	0
0	4	0	21	7	14	11	4	6	5	2	24	0	0	0	41	19	27	0	2	7	13	0	0	17	41	14	28	0	8	24	9					57	0	27	0	5	21	26	1	13	7	31	51	0	0
0	2	0	14	3	10	1	8	4	6	12	7	0	0	0	18	5	11	3	18	17	35	0	15	11	0	23	25	0	6	28	0					57	0	37	0	21	26	8	0	17	7	38	40	0	0
0	6	0	10	37	6	5	17	6	16	17	11	0	0	0	15	4	16	3	59	6	29	0	0	11	0	15	36	0	13	50	0					56	0	36	0	1	10	19	0	19	11	35	70	0	0
0	1	0	8	22	4	9	10	0	2	9	26	0	0	0	38	5	28	0	1	16	16	0	1	22	0	15	77	0	5	3	0					53	0	24	0	18	16	27	0	12	7	32	53	0	0
0	0	0	6	0	5	0	31	1	7	25	0	0	0	0	88	6	27	0	15	6	37	0	4	17	4	13	30	0	4	7	0					18	0	39	0	2	15	8	3	6	10	31	44	0	0
octβ2Rf05679/+
DMSO																																			100 uM Amitraz
79	76	67	62	47	52	74	40	47	59	72	75	45	47	57	66	41	12	48	37	56	62	61	81	18	61	45	56	55	49	50	41				48	59	63	46	58	69	75	175	72	63	58	70	78	21	73
79	47	48	44	30	61	49	12	58	74	47	52	60	47	66	58	52	14	40	38	48	67	41	91	2	36	40	53	43	40	34	44				39	52	37	51	51	79	73	142	126	52	44	16	40	0	67
22	0	11	0	16	21	1	0	30	12	0	2	32	30	24	17	50	19	4	5	48	90	15	1	1	3	9	58	15	17	0	6				9	28	40	0	46	8	77	113	78	16	18	9	0	0	0
0	0	6	0	0	0	0	0	0	1	0	0	17	19	3	0	0	4	0	17	0	0	0	0	3	0	0	10	0	1	0	0				0	0	4	0	15	0	55	97	37	4	0	47	0	0	17
0	0	0	0	2	0	0	2	0	0	0	0	6	0	11	0	0	0	0	10	0	0	0	0	2	0	0	0	0	7	0	0				0	0	1	0	0	5	30	96	57	3	0	33	11	0	3
0	0	24	0	0	0	0	0	0	0	0	0	0	0	27	0	0	12	7	0	0	0	24	0	1	0	0	0	0	0	11	0				0	0	4	0	0	3	0	96	35	7	0	13	16	0	3
0	0	0	0	20	0	0	0	0	0	0	0	0	0	0	0	0	0	0	0	34	0	0	0	3	25	0	0	0	0	0	0				0	0	4	0	0	1	0	96	50	37	0	3	4	0	2
0	0	0	0	13	0	0	0	0	0	0	0	0	0	0	0	4	0	0	28	18	0	0	8	13	0	0	0	0	0	0	0				0	0	0	0	0	3	0	96	28	11	0	11	3	0	26
0	0	2	0	0	0	0	0	0	2	0	0	0	0	0	0	14	0	1	24	3	0	0	47	2	0	0	5	0	4	0	0				0	0	0	0	0	0	0	96	0	5	0	2	0	0	1
0	0	0	0	0	0	0	0	0	0	0	0	0	0	0	0	2	0	9	0	7	0	2	0	9	0	35	0	0	0	0	0				0	0	0	0	0	0	0	96	85	2	0	34	0	0	5
0	0	0	0	5	0	0	0	5	0	0	0	0	0	20	0	0	0	6	0	6	0	0	0	9	0	14	0	0	0	0	0				0	0	0	0	0	0	0	95	23	2	0	16	0	0	12
0	0	0	0	0	0	0	0	0	0	0	0	0	0	3	0	0	0	0	0	6	0	0	0	38	0	0	0	0	0	0	0				0	0	0	0	0	0	0	96	82	0	0	0	0	0	6
0	0	0	0	0	0	0	0	0	0	0	0	0	0	25	0	10	0	0	0	0	0	0	0	56	0	0	0	0	0	0	0				0	0	0	0	0	0	0	96	41	0	0	2	3	0	21
0	0	0	0	0	0	0	0	30	3	0	0	0	0	45	0	0	0	0	0	7	0	0	0	61	0	0	0	0	0	0	0				0	0	0	0	11	0	0	95	73	1	0	1	0	0	2
0	0	0	0	0	0	0	0	50	0	0	0	0	0	0	0	0	0	0	0	1	0	0	0	65	7	0	0	0	0	0	0				0	0	0	0	4	0	0	95	25	0	0	9	1	0	0
0	0	0	0	42	0	0	0	1	0	0	0	0	0	0	0	0	0	0	0	40	0	0	0	69	0	0	0	0	0	0	0				0	0	0	0	8	3	0	95	91	0	0	9	10	0	0
0	0	0	0	0	0	0	0	9	0	0	0	0	0	0	0	0	0	5	0	5	0	4	0	63	0	0	0	33	0	0	0				0	0	0	0	6	2	0	95	31	0	0	38	0	0	0
0	0	0	0	0	0	0	0	26	0	0	7	0	0	0	0	0	0	0	0	3	0	1	0	63	0	0	0	17	0	0	0				0	0	0	0	0	2	0	94	17	0	0	25	0	0	0
0	0	0	0	0	0	0	0	30	0	0	0	0	0	13	0	0	0	0	0	0	0	8	0	55	0	0	0	11	0	0	0				0	0	0	0	0	2	0	94	49	0	0	19	0	0	0
0	0	0	0	22	0	0	0	5	0	0	16	0	0	4	0	0	0	0	0	0	0	0	0	62	0	37	0	0	0	0	0				0	0	41	0	9	13	0	93	45	0	0	7	0	0	0
0	0	0	0	10	0	0	27	10	0	0	0	0	0	0	0	0	0	0	0	0	0	15	25	67	0	15	0	0	0	0	0				0	3	9	0	0	0	0	93	25	0	0	9	0	0	0
0	0	0	0	5	0	0	0	45	0	0	0	0	0	0	0	0	0	0	0	14	0	2	0	73	0	36	0	0	0	0	0				0	21	0	0	20	0	0	94	63	0	0	6	0	0	0
0	0	0	0	0	0	0	0	8	4	0	0	0	0	0	1	0	0	0	0	12	4	2	0	69	0	0	0	0	0	0	0				0	0	0	0	0	0	0	92	29	0	0	3	0	0	0
0	0	8	0	0	0	0	0	56	3	0	10	0	0	20	0	0	8	0	0	4	28	21	13	76	0	21	2	7	0	0	0				0	0	0	0	77	0	0	93	85	0	0	3	0	0	0
76	78	62	79	48	37	56	27	55	59	52	58	38	31	56	63	63	29	61	20	96	67	81	59	83	78	48	72	54	55	56	48				24	47	59	71	62	64	62	140	60	34	47	33	35	31	86
61	76	67	57	64	32	69	59	50	56	39	50	42	31	49	54	54	31	55	96	43	43	42	67	64	68	32	36	37	46	41	38				32	24	54	28	13	23	55	109	36	7	49	9	11	35	37
53	66	43	29	44	63	44	116	47	38	29	48	38	28	36	46	30	25	37	45	33	42	33	57	32	55	34	41	48	36	38	27				20	10	33	7	9	25	33	104	21	11	12	0	14	14	17
48	59	38	34	13	24	51	8	50	31	14	64	29	24	24	64	34	16	32	44	21	26	23	44	27	37	39	31	22	40	47	22				15	9	64	8	3	13	42	102	17	15	40	16	33	10	3
34	64	45	36	8	24	50	14	59	36	25	52	31	26	23	39	53	7	38	45	36	42	15	47	24	55	14	25	24	31	35	20				10	9	43	3	1	27	57	101	17	12	11	24	14	20	3
34	57	11	39	15	21	57	0	72	30	16	38	28	17	17	25	26	11	14	11	31	31	13	38	20	73	28	29	22	29	33	24				11	6	33	21	2	8	73	146	8	7	4	10	4	9	9
17	75	24	11	18	14	14	7	34	26	0	34	53	18	15	8	26	18	40	56	40	32	10	14	7	18	36	30	9	36	22	27				6	4	31	7	7	7	63	123	38	10	8	8	17	27	39
42	69	15	60	30	31	53	0	47	16	36	30	25	13	14	32	22	21	26	34	17	17	19	22	19	36	13	37	18	39	26	39				24	8	40	61	30	42	64	24	16	13	36	7	26	17	66
29	33	24	70	8	12	33	0	63	24	10	35	45	28	0	8	31	8	18	28	15	8	8	42	22	19	16	34	4	19	12	34				15	3	45	4	1	16	26	76	2	5	3	5	30	9	40
0	17	31	0	8	0	8	3	24	12	3	0	18	24	7	3	21	14	20	4	0	24	6	11	9	0	7	31	2	11	0	1				18	4	22	15	11	15	12	89	7	7	0	6	0	11	15
17	2	5	0	5	0	34	4	8	6	0	0	8	0	0	12	28	11	19	7	18	10	0	0	5	22	21	22	0	5	12	0				11	12	6	22	5	13	17	102	9	15	10	2	6	4	7
25	0	6	0	9	0	1	0	66	2	0	0	2	10	0	4	6	10	0	8	9	15	0	0	6	4	25	34	0	2	0	0				9	11	29	10	2	7	14	109	26	7	12	8	7	4	16
3	23	15	4	12	0	6	0	8	20	0	0	0	15	13	0	0	2	0	9	0	5	0	0	0	0	0	0	6	0	0	0				13	5	45	26	7	19	7	99	6	8	15	5	9	36	29
5	3	0	0	11	0	0	0	27	0	4	0	0	8	0	0	0	23	0	4	23	3	0	0	0	0	0	0	0	9	0	0				19	18	58	0	5	30	13	46	8	10	5	5	4	7	16
0	10	0	0	0	0	0	0	13	0	2	0	27	0	0	0	0	4	0	1	9	2	0	0	0	0	0	0	0	0	0	0				0	6	8	7	5	3	13	124	15	17	4	3	4	8	14
0	1	0	0	11	0	0	0	2	0	3	0	9	0	0	2	0	11	0	0	0	7	0	8	0	0	0	0	0	0	0	0				4	20	37	21	8	0	16	110	40	9	6	9	0	7	10
0	0	0	2	0	0	0	0	0	0	16	0	9	0	0	0	0	0	0	0	0	3	0	7	0	0	0	0	0	0	0	0				70	22	28	28	5	0	8	95	0	10	7	5	30	6	37
15	0	0	0	9	0	0	0	2	0	0	0	9	0	0	3	0	0	9	0	0	5	0	5	1	0	0	0	0	0	0	3				46	4	9	4	14	1	7	92	0	15	39	41	0	14	31
0	10	0	0	19	2	0	6	0	0	11	0	4	0	11	3	1	0	0	0	0	4	0	9	0	0	0	0	12	0	0	0				21	6	5	3	0	5	17	80	18	10	19	13	0	2	13
0	0	0	0	12	0	0	0	7	0	5	0	2	24	0	6	0	0	0	0	0	0	0	10	0	0	0	0	0	0	0	7				18	5	1	2	8	14	5	78	0	44	6	1	0	2	32
13	0	0	0	26	0	0	0	25	4	8	0	8	0	14	0	0	6	23	5	0	0	0	0	0	0	1	0	3	0	0	0				2	2	2	7	0	37	3	105	0	47	0	3	0	19	38
4	0	0	0	6	0	0	0	26	10	10	0	0	19	14	14	5	42	26	50	0	0	0	19	1	0	18	0	9	0	0	0				73	2	0	23	0	10	71	104	74	48	0	19	34	12	11
18	4	0	0	5	9	0	37	40	44	1	0	6	11	31	2	32	16	65	71	43	0	0	8	10	2	9	29	16	19	32	0				30	27	0	4	60	41	61	126	68	48	15	9	31	28	40
20	2	10	19	24	19	26	0	44	23	17	1	17	9	17	0	22	9	30	14	37	16	27	0	17	32	20	27	21	20	36	19				24	25	9	32	41	48	81	129	83	70	5	23	25	51	33
77	83	45	55	25	53	62	23	69	61	16	53	66	36	48	52	55	39	38	37	54	76	77	64	15	70	50	62	61	57	64	62				23	64	71	61	48	74	92	81	98	97	86	54	52	31	68
24	56	13	0	37	22	0	0	63	21	0	40	33	23	18	13	40	2	0	18	53	38	29	41	0	29	21	46	14	42	15	27				0	50	43	40	48	16	43	5	14	13	75	56	0	0	50
0	6	3	0	11	8	0	0	27	0	0	27	4	0	9	0	32	0	0	3	0	0	12	8	0	0	0	10	6	9	0	0				0	0	19	0	30	14	0	0	54	68	2	10	0	0	13
0	0	11	0	0	2	0	0	0	0	0	19	0	0	0	0	17	0	0	1	0	0	0	14	0	0	0	0	5	0	0	0				10	0	0	0	8	2	0	0	5	11	0	0	0	0	3
0	0	0	0	0	0	0	0	0	0	0	0	0	0	0	0	0	0	0	2	0	0	0	0	0	0	0	0	3	0	0	0				28	0	11	0	0	4	0	0	2	65	0	0	0	0	37
0	0	0	0	0	0	0	0	0	0	0	0	0	0	0	0	0	0	0	0	0	0	0	0	0	0	0	0	0	0	0	0				28	0	0	0	0	0	0	0	0	55	0	0	0	0	4
15	0	0	0	0	0	0	0	0	0	0	7	0	0	0	0	12	0	0	0	0	0	0	0	0	0	0	0	0	0	0	0				17	0	0	0	14	0	0	0	0	35	0	0	0	0	14
1	0	0	0	4	0	0	0	0	0	0	1	0	0	0	0	0	0	0	0	0	0	0	0	0	0	0	0	0	0	0	0				6	0	0	0	0	0	0	0	9	10	0	0	0	6	22
2	0	0	0	4	0	0	0	0	0	0	5	0	0	0	0	0	0	0	0	0	0	0	0	0	0	0	0	0	0	0	0				30	0	4	0	0	0	0	0	0	21	0	0	0	0	0
23	0	0	0	0	0	0	0	0	0	0	2	0	0	0	0	0	0	0	0	0	0	0	0	0	0	0	2	7	0	0	0				4	0	3	0	8	2	0	0	0	40	0	0	0	31	0
5	0	0	0	0	0	0	0	0	0	0	0	0	0	0	0	0	0	0	12	0	0	0	0	0	0	0	2	0	0	0	0				24	0	0	0	7	0	0	0	24	50	0	0	0	18	0
0	0	0	0	0	0	0	0	0	0	0	0	0	0	0	0	0	0	0	10	0	0	22	0	0	0	6	0	0	0	0	0				8	3	11	0	0	0	0	0	0	48	0	0	0	0	12
0	0	0	0	3	0	0	0	0	0	0	0	0	0	0	0	0	6	0	1	0	0	1	0	0	0	0	0	0	0	0	0				2	28	0	0	0	0	0	0	0	38	0	0	0	0	25
1	0	0	0	13	0	0	0	0	0	0	0	0	0	0	0	0	0	0	8	0	0	32	0	0	0	0	0	0	0	0	0				0	16	0	0	0	0	0	0	0	35	0	0	0	0	0
0	9	0	0	0	0	0	1	0	9	0	0	0	0	3	0	0	0	0	2	0	0	2	0	0	0	0	0	0	0	0	0				0	11	0	0	14	0	7	0	0	29	0	0	0	0	1
0	5	0	0	11	0	0	0	0	0	0	0	0	0	0	0	0	0	0	1	0	0	0	0	0	0	0	0	0	0	0	0				44	0	0	0	0	0	4	0	0	56	0	0	0	0	0
0	4	0	11	3	0	0	0	0	0	0	0	0	0	0	0	0	0	0	0	0	0	0	0	0	5	0	15	0	0	0	0				10	0	0	0	0	0	0	0	0	32	0	0	0	0	0
0	0	0	35	0	0	0	0	0	0	0	0	16	0	0	0	0	0	0	0	0	0	0	0	0	5	9	31	5	0	0	0				16	16	0	0	0	0	0	0	0	28	0	0	0	0	0
0	0	0	0	0	0	0	10	0	0	0	0	0	0	0	0	0	0	0	0	0	0	1	0	0	2	0	23	8	0	0	0				17	22	4	0	0	0	0	0	0	26	0	0	0	0	14
0	5	0	0	0	0	0	0	0	0	32	0	0	0	0	0	0	11	0	0	0	13	0	0	0	14	0	14	0	0	0	2				22	9	0	0	0	0	0	0	0	4	0	0	0	0	10
0	0	0	0	0	0	0	0	0	0	0	0	0	0	5	0	0	2	0	0	0	31	0	0	0	0	0	0	0	0	0	0				9	2	0	0	0	0	0	0	0	2	0	0	0	0	9
0	14	0	0	0	0	0	0	0	0	0	0	0	0	0	0	0	7	0	11	0	0	0	0	0	0	0	0	0	0	0	0				9	0	0	0	6	0	0	4	0	0	0	0	0	28	0
0	9	0	0	0	39	0	0	0	2	0	1	0	0	0	0	0	10	0	0	0	0	0	0	0	0	17	4	0	0	0	0				0	5	20	0	0	0	0	0	0	3	0	0	0	0	11
0	10	0	0	0	34	0	0	0	21	0	5	0	0	5	0	14	2	0	0	8	0	0	0	0	0	28	2	30	0	0	0				0	0	0	0	10	0	26	0	8	5	0	0	0	0	4
51	89	53	75	39	57	61	28	64	54	41	47	42	24	39	37	52	37	56	46	42	54	58	50	15	53	56	51	56	49	48	34				25	68	34	49	54	55	74	69	79	72	60	43	13	62	55
49	58	44	53	27	43	47	22	50	55	34	47	31	30	25	41	39	39	58	30	45	51	53	50	32	44	30	47	53	56	34	64				20	54	19	18	51	30	41	55	20	35	45	44	24	34	27
36	54	44	75	20	44	35	50	46	33	26	48	48	21	20	25	41	31	53	36	33	47	18	58	14	38	36	60	36	33	38	34				30	29	29	6	2	5	17	46	6	24	17	31	3	20	5
11	56	38	56	17	37	41	6	68	35	23	50	35	17	33	28	36	28	48	33	26	31	18	60	45	36	25	40	38	44	23	27				20	20	10	0	4	18	2	44	10	18	21	38	1	15	8
41	41	23	30	22	46	34	16	49	30	26	38	32	17	8	21	38	25	31	33	28	36	7	44	29	34	23	33	38	19	27	36				16	15	19	8	7	28	15	43	7	20	21	38	2	5	18
12	42	29	16	12	40	30	9	47	37	15	38	30	10	12	0	49	30	18	26	22	30	3	42	32	12	12	38	25	8	55	15				17	20	1	39	7	8	19	47	11	16	15	35	4	28	24
7	44	6	22	10	32	38	7	51	33	23	10	30	14	0	12	43	22	19	26	24	2	23	29	20	20	1	21	6	0	31	13				20	24	13	8	1	35	19	14	7	19	35	42	30	14	7
17	25	10	9	23	13	5	1	67	19	8	29	29	4	0	0	47	25	22	15	18	15	3	26	26	8	31	23	8	4	26	0				18	5	3	5	7	15	12	44	5	3	25	31	23	7	9
7	19	0	0	9	3	55	0	54	6	1	0	59	11	0	5	7	0	10	5	28	26	0	18	3	4	0	24	7	0	22	19				25	10	11	4	12	74	35	37	9	6	11	20	13	6	10
0	11	0	0	12	12	1	0	2	31	0	0	45	3	0	13	31	0	4	3	6	16	0	0	0	5	11	0	0	0	37	6				5	6	6	21	4	8	12	57	16	9	30	28	23	4	17
1	0	0	16	11	12	2	0	0	3	0	0	26	5	0	0	0	1	21	1	5	11	2	0	0	3	0	0	0	0	6	0				28	6	10	11	3	25	7	31	26	20	23	16	40	17	22
0	0	0	7	0	0	0	0	0	1	0	0	9	0	0	0	0	0	2	0	8	4	39	0	0	8	0	2	0	0	0	0				26	10	14	6	9	40	4	45	13	25	20	25	4	7	12
0	0	0	3	0	0	6	2	0	11	0	0	40	0	0	13	0	0	1	8	0	2	5	0	0	0	0	11	0	0	0	33				10	9	6	8	5	9	9	58	10	7	11	18	3	3	4
0	0	0	1	5	8	1	1	4	0	4	0	22	0	0	7	0	0	3	0	14	4	13	4	0	5	1	3	0	0	0	1				28	8	8	15	3	13	12	39	33	15	13	13	2	1	12
0	0	0	10	11	0	4	0	3	0	21	0	1	0	0	0	0	2	1	0	16	2	0	2	4	8	0	4	2	0	0	34				17	21	8	11	4	7	23	39	29	7	20	16	2	11	20
0	19	0	4	22	0	0	0	0	0	0	0	0	0	0	5	42	0	3	0	2	13	4	17	0	0	1	4	0	0	0	19				7	6	6	9	1	23	20	18	0	32	30	15	2	3	3
0	4	0	15	2	0	0	2	0	6	41	0	0	0	0	4	4	1	0	0	0	0	0	3	0	11	51	13	0	0	0	0				17	3	2	5	2	6	13	31	32	23	7	58	2	27	5
0	9	0	4	1	0	0	0	0	3	0	0	0	0	0	8	5	0	2	0	2	7	0	3	0	0	0	4	1	3	0	1				78	5	7	26	2	4	8	59	2	2	15	16	3	31	3
10	1	0	0	1	0	0	2	2	1	0	0	0	5	11	1	40	0	13	0	39	11	0	18	0	0	9	3	13	0	0	2				15	0	6	25	3	88	33	38	14	42	4	13	0	30	19
0	0	0	0	26	1	0	0	0	9	0	0	0	0	0	0	3	0	0	0	0	0	0	35	0	0	3	6	1	0	18	1				26	0	3	7	2	2	45	40	7	14	22	0	0	16	22
0	6	0	0	9	0	0	0	0	8	0	0	0	42	1	3	2	0	0	0	0	0	0	1	0	1	1	2	1	0	1	9				0	4	2	2	9	14	33	33	23	30	0	7	1	13	29
10	46	0	5	5	10	0	0	44	33	2	5	5	2	0	0	14	33	5	0	11	0	0	7	2	0	60	15	16	0	10	35				0	0	2	22	16	43	37	21	87	28	15	4	41	37	36
11	5	0	0	10	15	0	0	40	5	7	11	4	8	10	5	14	36	22	2	9	6	0	33	4	27	31	53	21	0	34	12				17	25	60	32	31	53	48	71	68	32	20	26	6	33	28
21	8	1	2	23	24	0	2	28	25	11	23	23	12	28	37	0	22	39	126	73	16	0	40	23	20	50	25	37	25	30	0				19	63	42	43	47	45	49	68	74	38	42	4	25	47	38
20	14	24	34	20	52	14	6	84	55	46	60	43	37	43	56	56	9	55	20	51	66	0	57	7	22	48	48	49	45	40	48				42	63	68	58	53	61	73	72	82	76	68	25	52	22	68
0	0	8	0	19	32	0	3	62	10	8	46	27	20	24	20	40	0	27	7	8	59	0	38	12	1	24	53	35	35	14	9				0	42	38	16	45	14	36	18	19	40	56	0	35	0	26
0	0	0	0	4	2	0	0	12	0	0	0	2	0	6	0	40	0	2	1	0	33	0	10	0	0	0	8	0	17	38	0				0	0	0	0	45	5	0	0	2	2	0	0	0	0	0
0	0	0	0	2	0	0	0	0	0	0	0	0	0	0	0	8	0	0	0	0	0	0	8	0	0	6	2	0	0	1	0				0	0	0	0	1	0	0	0	24	0	0	0	0	0	0
0	0	0	0	5	0	0	0	0	0	0	0	0	0	0	0	0	0	0	0	0	0	0	0	0	0	0	0	0	0	11	0				0	0	0	0	0	0	0	0	0	0	0	0	0	0	0
0	0	0	0	20	0	7	0	0	0	0	0	0	0	0	0	0	0	0	0	0	0	0	0	0	0	0	0	0	0	0	0				0	0	0	0	0	6	0	2	0	0	0	0	0	0	0
0	0	0	0	0	0	9	0	0	3	0	0	0	0	1	0	0	0	0	0	0	0	0	5	0	0	0	0	0	0	0	0				0	0	0	0	0	0	0	0	0	0	0	0	0	0	0
0	0	0	0	0	2	0	0	0	0	4	0	0	0	0	0	0	0	0	0	0	0	0	0	0	0	0	0	0	0	0	0				0	0	0	0	0	0	0	0	0	0	0	0	0	0	0
0	0	0	0	0	0	0	0	0	0	0	0	2	0	0	0	0	0	0	0	0	0	0	0	0	5	0	0	0	0	0	0				0	0	0	0	0	0	0	0	0	0	0	0	0	0	0
0	0	0	0	0	0	0	0	0	4	0	0	0	0	6	0	0	0	29	0	0	0	0	0	0	7	0	6	0	0	0	0				0	0	0	0	0	0	0	0	0	0	0	0	0	0	0
0	0	0	0	6	0	0	0	0	0	0	0	0	0	0	0	0	0	0	0	0	0	0	0	0	0	0	16	0	0	0	0				0	0	0	0	0	0	0	0	0	0	0	0	0	0	0
0	0	0	0	0	0	0	0	0	0	0	0	11	0	0	0	0	0	9	0	0	0	0	0	0	0	0	13	0	0	0	0				0	0	0	0	0	0	0	0	0	0	0	0	0	0	0
0	0	0	0	0	0	0	0	0	5	0	0	2	0	0	0	0	0	0	0	0	0	0	0	0	0	0	2	0	0	0	0				0	0	0	0	0	0	0	42	0	0	0	2	0	0	0
0	0	0	0	0	0	0	0	0	0	0	0	0	0	0	0	5	0	0	0	0	0	0	0	0	0	0	3	0	0	3	0				0	0	0	0	0	0	0	2	28	0	0	0	0	0	0
0	0	0	0	3	0	0	0	0	15	0	0	0	0	0	0	13	0	0	0	0	0	0	0	0	0	0	4	4	0	0	0				0	0	3	0	0	0	0	14	60	0	0	0	0	0	0
0	0	0	5	0	0	0	0	0	37	0	0	0	0	0	0	0	0	0	0	0	0	0	0	0	0	0	0	1	0	0	0				0	0	0	0	0	0	0	0	25	0	0	0	0	0	0
0	0	7	4	0	0	0	0	0	36	0	0	0	0	0	0	0	0	0	0	0	0	0	0	0	6	0	11	7	0	0	0				0	0	0	0	0	0	0	27	60	0	0	0	0	0	0
0	0	0	0	0	0	0	0	0	7	0	0	0	0	0	0	0	0	0	0	0	0	0	0	0	0	0	7	0	0	0	0				0	10	0	0	0	0	0	19	33	0	16	0	27	0	0
0	0	0	18	0	0	0	0	0	0	0	0	0	0	15	0	0	0	0	0	0	0	0	0	0	0	0	14	2	0	0	0				0	21	0	0	0	1	0	21	67	0	0	0	3	0	0
0	0	0	40	2	0	0	9	0	8	0	0	0	0	4	0	0	0	0	0	0	0	0	0	0	4	0	6	20	0	0	0				0	13	0	0	0	0	0	1	24	0	0	0	0	0	0
0	0	7	8	3	0	0	0	0	0	0	8	0	0	3	0	0	0	0	0	0	0	0	1	0	0	6	0	1	0	0	0				0	8	0	9	1	0	0	0	43	0	3	0	3	0	0
0	0	0	0	4	0	0	0	0	3	0	0	0	0	6	0	0	0	0	0	0	0	0	0	0	0	18	0	0	0	0	0				0	6	0	0	2	46	0	2	0	0	0	0	7	0	0
0	0	0	35	0	0	0	4	0	3	0	0	0	0	0	0	0	3	4	0	0	0	0	0	0	31	11	0	0	0	0	0				0	2	0	2	22	14	0	0	0	0	8	0	0	0	0
0	0	39	0	0	0	0	5	0	5	0	0	0	0	4	0	3	6	0	0	0	0	0	0	0	15	5	2	0	0	0	0				0	0	0	0	6	19	0	26	31	0	2	0	0	0	1
Daily crossings	DMSO
octβ2Rf05679	6.11	9.16	8.93	8.47	6.06	5.94	8.28	7.98	8.73	10.98	5.69	4.96	6.21	5.36	6.12	4.03	5.93	4.99	5.3	2.53	9.43	3.58	4.44	10.38	11.82	10.91	9.77	5.31	6.32	7.22	7.73	7.01	8.87	9.79	13.23	4.22	6.47	5.33	11.7	4.16	4.21	4.32	5.88	2.67	4.52	4.61	4.25	6.07	3.76
octβ2Rf05679/Df	4.53	6.49	3.9	10.02	5.86	8.79	5.46	8.68	6.74	7.77	6.19	8.08	6.9	8.51	7.29	7.71	4.16	4.95	3.52	5.16	7.73	5.48	12.82	14.95	7.17	8.1	3.82	6.81	7.67	8.51	1.45	3.95	1.4	13.32	7.15	5.54	5.79	8.73	6.06	6.71	8.39	10.97	9.93	5.64	8.58	2.85	3.62	4.57	8.07
octβ2Rf05679/+	6.62	8.5	4.68	5.41	5.16	4.46	5.64	3.15	9.28	5.51	3.49	5.7	5.67	3.95	4.29	4.53	6.24	3.93	5.51	6.58	5.86	5.6	4.53	5.94	3.62	6.24	4.92	6.89	4.46	5.05	4.69	4	3.04	5.51	3.33	5.47	4.05	4.85	3.9	1.75	7.77	6.29	3.41	4.6	5.98	2.82	2.99	3.41	6.72
	100 uM amitraz
octβ2Rf05679	7.77	5.03	6.62	8.05	8.34	8.11	7.88	6.34	9.25	8.35	14.84	6.86	14.4	3.63	11.92	5.2	9.15	3.4	7.28	5.55	3.43	1.63	12.86	4.41	9.99	4.68	5.43	6.3	7.49	3.88	7.53	7.88	6.73	6.53	11.92	10.24	1.03	6.56	6.96	5.74	9.08	6.24	10.8	3.68	8.96	6.64	4.31	5.63	8.53
octβ2Rf05679/Df	8.13	11.32	1.2	4.95	4.51	9.13	5.38	9.52	15.67	15.23	18.69	9.02	16.87	5.56	4.63	5.09	7.18	8.38	5.45	1.43	11.37	11.5	11.83	7.29	15.33	16.31	9.5	9.6	7.55	15.93	10.77	6.39	11.88	12.99	14.97	11.24	5.13	9.72	10.8	2.62	11.45	14.06	2.73	1.81
octβ2Rf05679/+	8.82	5.15	8.47	5.15	4.92	5.8	9.92	7.83	12.5	5.16	3.84	3.86	4.97	9.39	5.82	5.76	6.88	12.21	3.64	13.43	6.01	6.63	5.04	8.69	6.6	5.48	5.46	6.4	26.8	5.26	5.76	4.3	4.65	4.61	8.14	6.96	12.93	10.86	6.55	6.75	6.08	3.94	4.93	5.28	19.94	5.19	4.09	8.64	6.56
	1 mM amitraz
octβ2Rf05679	10.22	9.86	6.65	11.97	10.22	7.51	7.17	3.45	8.54	9.45	3.16	7.43	10.69	5.38	8.09	10.92	5.55	11.93	7.5	8.8	7.59	11.15	5.84	2.66	10.61	11.46	11.82	9.86	7.44	5.88	3.74	10.44	6.9	2.92	5.62	7.7	5.76	10.52	6.42	11.42	7.41	12.37	5.27	13.3	7.81	8.56	7.37	9.29	2.72
octβ2Rf05679/Df	3.09	9.48	11.18	9.62	6.1	7.7	10.44	24.23	7.44	10.38	7.52	6.77	13.28	5.23	21.16	3.16	6.16	6.06	18.87	1.05	12.4	11.5	7.3	9.19	4.94	8.79	0.88	9.19	7.81	15.4	7.21	8.79	5.04	7.48	17.51
octβ2Rf05679/+	7.45	4.58	8.9	14.31	13.05	10.1	6.58	12	6.7	7.09	9.72	10.36	8.03	6.61	8.54	4.71	13.01	8.2	4.71	8.51	9.4	6.65	4.75	9.5	9.6	8.35	7.34	7.31	8.99	5.52	10.51	7.38	5.2	8.84	14.42	16.5	9.16	6.05	7.04	6.88	5.59	7.18	7.81	2.8	7.37	3.92	11.02	3.38	11.06
[truncated: 49 more columns]
