# Supplementary material for: An octopamine receptor confers selective toxicity of amitraz on honeybees and Varroa mites
Source: eLife journal article supplement (doi:10.7554/elife.68268), 2021-07-12
Supplement: supp [file elife-68268-supp-v1.zip › elife_poa_e68268_Figure_4_source_data_1.xlsx]

## Sheet: Figure 4
gene	control		oamb		oct-tyrR		octa2R		octβ2R
temperature	23	32	23	32	23	32	23	32	23	32
	0	0	0	0	0	0	0	100	0	100
	0	0	0	0	0	0	0	100	0	100
	0	0	0	0	0	0	0	100	0	100
	0	0	0	0	0	0	0	100	0	100
	0	0	0	0	0	0	0	100	0	100
							0	100	0	100
							0	100	0	100
							0	100	0	100
							0	100	0	100
							0	100	0	100
