# Supplementary material for: An octopamine receptor confers selective toxicity of amitraz on honeybees and Varroa mites
Source: eLife journal article supplement (doi:10.7554/elife.68268), 2021-07-12
Supplement: supp [file elife-68268-supp-v1.zip › elife_poa_e68268_Figure_5_source_data_1.xlsx]

## Sheet: Figure 5A
Figure 5A Dose-response curves of amitraz against the Varroa OA receptors.
Log[amitraz (M)]	AmOctβ2RV3X
-11	18.8437	-9.42185	-9.42185	9.42185	21.1992	21.1992
-10	14.1328	9.42185	-4.71093	11.7773	11.7773	7.06639
-9	7.06639	-4.71093	-4.71093	4.71093	4.71093	-7.06639
-8	30.621	16.4882	0	11.7773	2.35546	-7.06639	14.1328	9.42185	0	9.42185	9.42185
-7	21.1992	21.1992	9.42185	30.621	28.2656	9.42185	32.9765	18.8437	18.8437	18.8437
-6	49.4647	35.3319	28.2656	61.242	61.242	37.6874	68.3084	56.5311	51.8202	44.7538
-5	80.0857	58.8866	61.242	108.351	91.8631	82.4412	94.2185	84.7967	73.0194	77.7303	51.8202
-4	73.0194	70.6639	30.621	54.1756	54.1756	47.1093	84.7967	80.0857	73.0194	63.5975	49.4647
Log[amitraz (M)]	AmOctβ2R
-11	14.1328	0	-16.4882
-10	2.35546	-4.71093	0
-9	2.35546	2.35546	2.35546
-8	2.35546	0	0
-7	0	4.71093	7.06639	7.06639	4.71093	-9.42185
-6	18.8437	11.7773	9.42185	11.7773	7.06639	2.35546	18.8437	-18.8437	37.6874	42.3983	35.3319	16.4882	23.5546	32.9765	40.0429	42.3983
-5.5	18.8437	30.621	28.2656	23.5546	54.1756	63.5975	75.3748	63.5975	70.6639	56.5311	61.242	51.8202	35.3319	44.7538
-5	40.0429	37.6874	37.6874	35.3319	14.1328	47.1093	47.1093	42.3983	89.5076	82.4412	73.0194	82.4412	80.0857	87.1521	77.7303	84.7967	84.7967	75.3748	73.0194
-4	32.9765	25.9101	16.4882	18.8437	14.1328	54.1756	37.6874	30.621	94.2185	84.7967	84.7967	82.4412	75.3748	73.0194	82.4412	37.6874
Log[amitraz (M)]	VdOctβ2R
-11	12.6316	-6.31578	-6.31578	9.47367	0	-3.15789	-15.7895	3.15789	12.6316
-10	15.7895	0	-6.31578	3.15789	15.7895	0	0	9.47367	9.47367
-9	6.31578	6.31578	6.31578	6.31578	0	-9.47367	0	6.31578	12.6316
-8	-3.15789	6.31578	6.31578	12.6316	0	0	-15.7895	6.31578	22.1052
-7	37.8947	41.0526	18.9474	56.8421	53.6842	44.2105	72.6315	59.9999	41.0526
-6	59.9999	56.8421	53.6842	94.7367	69.4736	53.6842	82.1052	78.9473	66.3157
-5	59.9999	56.8421	59.9999	88.421	75.7894	50.5263	104.21	97.8946	72.6315
-4	69.4736	44.2105	75.7894	69.4736	56.8421	56.8421	78.9473	72.6315
Log[amitraz (M)]	Dmoctβ2R
-11	-15.0094	7.50469	15.0094	11.257	18.7617	30.0188
-10	11.257	30.0188	3.75235	7.50469	30.0188	22.5141
-9	3.75235	18.7617	11.257	7.50469	15.0094	30.0188
-8	18.7617	-3.75235	11.257	11.257	11.257	15.0094
-7	30.0188	11.257	33.7711	11.257	11.257	22.5141
-6	48.7805	41.2758	52.5328	86.3039	71.2946	48.7805	90.0563	86.3039	63.7899
-5	86.3039	67.5422	67.5422	112.57	105.066	78.7993
-4	60.0375	37.5234	63.7899	67.5422	67.5422	67.5422	41.2758

## Sheet: Figure 5B
Figure 5B Dose-response curves of DPMF against the Varroa OA receptors.
Log[DPMF (M)]	AmOctβ2RV3X
-11	14.1328	9.42185	4.71093	7.06639	-4.71093
-10	28.2656	7.06639	-7.06639	-9.42185	4.71093
-9	7.06639	2.35546	-7.06639	9.42185	2.35546
-8	40.0429	18.8437	4.71093	37.6874	28.2656
-7	73.0194	49.4647		58.8866	54.1756
-6	98.9294	98.9294	84.7967	87.1521	75.3748
-5	108.351	98.9294	82.4412	117.773	101.285
-4	105.996			108.351	91.8631
Log[DPMF (M)]	AmOctβ2R
-11	28.2656	16.4882	-7.06639	21.1992	9.42185	-14.1328	9.42185	18.8437	-18.8437
-10	18.8437	7.06639	0	2.35546	4.71093	-21.1992	11.7773
-9	35.3319	18.8437	9.42185	16.4882	-16.4882	-7.06639	9.42185	-4.71093	-4.71093
-8	32.9765	21.1992	9.42185	42.3983	35.3319	18.8437	30.621	9.42185	9.42185
-7	58.8866	54.1756	54.1756	75.3748	65.953	35.3319	68.3084	49.4647
-6	94.2185	89.5076	80.0857	94.2185	80.0857	70.6639	87.1521	68.3084	61.242
-5	105.996	94.2185	98.9294	84.7967	70.6639	63.5975
-4	89.5076	84.7967	73.0194	70.6639	84.7967
Log[DPMF (M)]	VdOctβ2R
-11	28.421	-22.1052	12.6316	18.9474	12.6316	-9.47367	-28.421	-3.15789	34.7368
-10	0	22.1052	15.7895	-28.421	-18.9473	3.15789	15.7895
-9	44.2105	28.421	-6.31578	47.3684	44.2105	37.8947	41.0526	18.9474	18.9474
-8	78.9473	59.9999	34.7368	75.7894	34.7368	47.3684	56.8421	34.7368	15.7895
-7	91.5789	66.3157	63.1578	104.21	94.7367	91.5789	56.8421	50.5263
-6	113.684	113.684	59.9999	91.5789	78.9473	63.1578	82.1052	47.3684	50.5263
-5	113.684	97.8946	85.2631	129.474	116.842	113.684	101.052	82.1052	78.9473
-4	110.526	94.7367	107.368	101.052	97.8946	75.7894	53.6842
Log[DPMF (M)]	Dmoctβ2R
-11	22.5141	22.5141	15.0094	-18.7617	-18.7617
-10	45.0281	18.7617	7.50469	3.75235	0
-9	63.7899	60.0375	52.5328	52.5328	30.0188
-8	138.837	112.57	90.0563	86.3039	86.3039
-7	120.075	120.075	108.818	101.313	90.0563
-6	131.332	127.58	127.58	120.075	86.3039
-5	135.084	127.58	123.827	116.323	101.313

## Sheet: Figure 5—figure supplement 1
Figure 5—figure supplement 1 Dose-response curves of OA against the Varroa OA receptors.
Log[OA(M)]	AmOctβ2RV3X
-11	2.41546	2.41546	24.1546	9.66184	9.66184	-4.83092
-10	4.83092	9.66184	4.83092	9.66184	9.66184	4.83092
-9	36.2319	19.3237	4.83092	7.24638	7.24638	19.3237
-8	48.3092	38.6473	33.8164	33.8164	31.401	14.4927
-7	84.5411	60.3865	62.8019	77.2947	70.0483	67.6329
-6	106.28	106.28	113.527	120.773	113.527	101.449
-5	132.85	128.019	128.019	111.111	111.111	94.2029
-4	115.942	101.449	94.2029	132.85	123.188	99.0338
Log[OA(M)]	AmOctβ2R
-11	0	-4.83092	-7.24638
-10	0	7.24638	-7.24638
-9	19.3237	-14.4928	9.66184
-8	33.8164	16.9082	16.9082	21.7391	-19.3237	12.0773	28.9855	7.24638	4.83092	48.3092	48.3092
-7	62.8019	60.3865	62.8019	84.5411	89.372	74.8792	84.5411	84.5411	43.4783	89.372	82.1256	72.4638	96.6184	91.7874
-6	99.0338	60.3865	65.2174	103.865	82.1256	82.1256	111.111	96.6184	91.7874	94.2029	82.1256	74.8792	111.111	128.019
-5	82.1256	74.8792	67.6329	108.696	99.0338	86.9565	137.681	115.942	70.0483	176.328	101.449	72.4638	106.28	128.019
-4	82.1256	84.5411	91.7874	111.111	94.2029	74.8792	118.358	111.111	96.6184	142.512	120.773
Log[OA(M)]	VdOctβ2R
-11	3.37268	3.37268	-10.118	0	10.118	6.74536	16.8634	-16.8634	3.37268	6.74536	10.118	3.37268
-10	10.118	0	0	6.74536	3.37268	3.37268	16.8634	6.74536	6.74536	10.118	10.118	13.4907
-9	16.8634	10.118	0	16.8634	6.74536	3.37268	10.118	0	0	10.118	10.118	13.4907
-8	50.5902	33.7268	26.9814	57.3356	47.2175	20.2361	57.3356	40.4722	43.8449	70.8263	50.5902	47.2175
-7	53.9629	43.8449	40.4722	64.0809	47.2175	57.3356	87.6897	80.9444	77.5717	84.317	77.5717	77.5717
-6	97.8078	74.199	26.9814	84.317	80.9444	84.317	91.0624	84.317	84.317	128.162	114.671	101.18
-5	104.553	94.4351	104.553	111.299	67.4536	67.4536	128.162	118.044	101.18	145.025	121.416	118.044
-4	97.8078	87.6897	94.4351	111.299	107.926	87.6897	91.0624	70.8263	67.4536
Log[OA(M)]	Dmoctβ2R
-11	30.0188	0	-7.50469				11.257	18.7617	18.7617
-10	15.0094	7.50469	0				0	26.2664	30.0188
-9	0	11.257	0	22.5141	11.257	3.75235	41.2758	22.5141	22.5141
-8	52.5328	41.2758	11.257	56.2852	52.5328	33.7711	78.7993	60.0375	56.2852
-7	56.2852	48.7805	30.0188	86.3039	82.5516	71.2946	108.818	105.066	97.561
-6	67.5422	63.7899	26.2664	97.561	90.0563	71.2946	108.818	90.0563	93.8086
-5	86.3039	71.2946	56.2852	97.561	97.561	93.8086	101.313	120.075	93.8086
-4	97.561		60.0375	82.5516	97.561	101.313	120.075	112.57	127.58

## Sheet: Figure 5—figure supplement 2
Figure 5—figure supplement 2. Dose-response curves of OA, amitraz, and DPMF against the fly (A-C) and honeybee (D-F) OA receptors.
Log[OA(M)]	DmOAMB																				Dmoctα2R																				Dmoct-tyrR
-11	5.11361	8.52268	10.2272																		0	20.4082	5.10204	10.2041	-45.9184
-10	0	5.11361	1.70454																		5.10204	5.10204	0	-5.10204	-5.10204																61.5385	38.4615	-23.0769	-23.5294
-9	15.3408	15.3408	13.6363																		5.10204	-10.2041	-10.2041	20.4082	-10.2041																15.3846	-7.69231	-15.3846	58.8235
-8	44.3179	39.2043	17.0454																		45.9184	35.7143	66.3265	10.2041	-10.2041																30.7692	23.0769	-15.3846	35.2941
-7	76.7041	73.295	39.2043																		61.2245	40.8163	81.6326	81.6326																	92.3077	53.8462		47.0588
-6	90.3404	88.6359	83.5222																		81.6326	40.8163	147.959	91.8367	86.7347																53.8462	69.2308	61.5385	94.1176
-5	107.386	100.568	92.0449																		107.143	61.2245	122.449	122.449	86.7347																84.6154	100	76.9231	64.7059
-4	92.0449	88.6359	85.2268																		86.7347	71.4286	112.245	112.245	112.245																115.385	100	84.6154	100
Log[amitraz(M)]	DmOAMB																				Dmoct-tyrR																				Dmoctα2R
-11	5.55556	3.7037	-1.85185																		11.7647	5.88235	5.88235
-10	5.55556	3.7037	-9.25926																		23.0769	-11.7647	-11.7647																		10.2041	-5.10204	15.3061
-9	1.85185	-3.7037																			7.69231	11.7647	11.7647																		15.3061	15.3061	15.3061
-8	-1.85185	-7.40741																			7.69231	15.3846	9.09091																		5.10204	10.2041	20.4082
-7	0	-3.7037	-3.7037																		23.0769	15.3846	54.5455																		20.4082	30.6122	0	56.1225	35.7143
-6	40.7407	7.40741	0																		92.3077	76.9231	69.2308	82.3529																	30.6122	45.9184	40.8163	45.9184	51.0204
-5.5	50	46.2963	35.1852	57.4074	38.8889	38.8889		38.8889	38.8889
-5	79.6296	72.2222	62.963	79.6296	70.3704	62.963	83.3333	68.5185	72.2222												46.1538	46.1538	52.9412	58.8235																	61.2245	40.8163	40.8163	45.9184
-4	87.037	61.1111	44.4444	94.4444	85.1852	79.6296	72.2222	74.0741
Log[dpmf(M)]	DmOAMB																				Dmoctα2R																				Dmoct-tyrR
-11	10.2272	-8.52268	-8.52268																		51.0204	15.3061	30.6122	-5.10204																	18.1818	18.1818	0
-10	3.40907	3.40907	11.9317																		35.7143	10.2041	10.2041	10.2041																	0	0	-6.66667
-9	17.0454	11.9317	6.81814																		5.10204	0	5.10204	5.10204																	0	33.3333	26.6667	13.3333	26.6667
-8	40.9089	34.0907	11.9317																		30.6122	0	-10.2041	0																	45.4545	54.5455	0	-18.1818	60	40	-13.3333
-7	83.5222	69.886	68.1814																		81.6326	81.6326	20.4082	15.3061																	72.7273	9.09091	54.5455	46.6667	33.3333	40	13.3333
-6	114.204	107.386	93.7495																		107.143	66.3265	86.7347	66.3265																	109.091	63.6364	18.1818	53.3333	53.3333
-5	103.977	102.272	102.272																		158.163	102.041	91.8367	76.5306																	63.6364	90.9091	100	72.7273	53.3333

## Sheet: Figure 5—figure supplement 3
Figure 5—figure supplement 3. Adult survival when reared on sucrose solution containing 5 mM amitraz and 1 mM detoxicative enzyme inhibitor.
Hour	1 mM PBO																				5 mM amitraz																				1 mM PBO + 5 mM amitraz
0	100	100	100	100	100																			100	100	100															100	100	100	100	100	100	100	100	100
24	100	100	100	90	100																			100	100	100															100	90	80	80	100	70	100	90	90
48	100	100	100	90	100																			100	100	100															80	90	70	80	90	60	70	70	50
72	100	100	100	90	100																			100	100	90															70	70	50	80	90	60	70	50	50

## Sheet: Figure 5—figure supplement 4
Figure 5—figure supplement 4 Dose-response curves
Log[DMA(M)]	DMA
-11	23.0769	4.1958	18.8811	14.6853	12.5874
-10	23.0769	16.7832	-2.0979	-2.0979	-8.3916
-9	18.8811	14.6853	12.5874	0	-4.1958
-8	6.2937	8.3916	16.7832	23.0769	35.6643
-7	31.4685	29.3706	31.4685	12.5874	29.3706
-6	20.979	14.6853	10.4895	4.1958	8.3916
-5	12.5874	4.1958	2.0979	-8.3916	33.5664
Log[DMF(M)]	DMF
-11	27.2727	20.979	20.979	8.3916	8.3916
-10	23.0769	12.5874	4.1958	-2.0979	-2.0979
-9	33.5664	0	-2.0979	-6.2937	0
-8	27.2727	16.7832	16.7832	6.2937	6.2937
-7	29.3706	25.1748	8.3916	8.3916	8.3916
-6	18.8811	8.3916	6.2937	4.1958	4.1958
-5	41.958	29.3706	16.7832	16.7832	14.6853
-4	27.2727	23.0769	16.7832	12.5874	14.6853
