# Supplementary material for: An octopamine receptor confers selective toxicity of amitraz on honeybees and Varroa mites
Source: eLife journal article supplement (doi:10.7554/elife.68268), 2021-07-12
Supplement: supp [file elife-68268-supp-v1.zip › elife_poa_e68268_Figure_6_source_data_1.xlsx]

## Sheet: Figure 6A
Figure 6A Number of lunges
	AmOctb2R
DMSO	1	3	1	3	2	1	2	2	4	2	5	3	3	1	3	4	4	3	2	2	3
1mM amitraz	17	8	10	9	12	19	9	10	5	10	4	7	13	10	8	8	5	10	8	5	20
	AmOctβ2RV3X
DMSO	3	3	4	3	1	3	2	4	1	1	3	2	3	4	2	1	1	2
1mM amitraz	13	14	22	19	14	25	26	24	28	17	27	20	11	16	4	17	23	16	20	16	12	14
	VdOctb2R
DMSO	1	4	2	4	3	5	3	3	2	2	5	1	4	3	3	2	3	4	5	2
1mM amitraz	9	12	8	22	14	23	28	27	21	27	18	19	15	6	16	17	27	14	12	14	13	14

## Sheet: Figure 6B
Figure 6B latencies before initiating fighting
AmOctb2R	552	177	527	348	343	470	320	634	477	480	422	356	347	730	500	372	435	500	620	470	490
AmOctβ2RV3X	611	749	337	448	36	247	642	368	382	350	168	740	382	385	340	376	298	629
VdOctb2R	552	177	527	348	343	470	320	634	477	480	422	356	347	730	500	372	435	500	620	470	490
AmOctb2R	89	12	158	6	63	21	15	122	62	70	212	320	69	44	91	104	51	36	31	215	21	50
AmOctβ2RV3X	38	12	16	26	19	7	26	35	181	95	20	58	10	65	96	41	62	22	18	12	63
VdOctb2R	15	51	177	42	16	97	50	74	35	32	47	75	54	28	191	7	54	7	8	51	25

## Sheet: Figure 6C
Figure 6C Midline crossing activity
DMSO																			100 uM Amitraz																			1 mM Amitraz
29	5	10	0	11	22	18	28	28	25	0	6	52	53	28					23	5	33	13	35	2	1	11	22	16	0	0	0	0	0					4	14	0	35	8	43	5	18	11	0	0	5
5	14	0	3	0	33	0	42	0	21	2	2	11	17	33					9	4	0	0	0	0	0	11	30	0	0	0	5	0	4					0	0	3	0	14	88	0	0	37	0	0	0
0	2	0	93	0	58	28	48	0	37	0	0	0	0	29					0	1	0	0	0	10	0	9	0	0	0	0	47	0	0					4	0	0	4	26	0	1	0	9	0	0	4
0	0	0	1	0	39	0	15	0	31	0	0	0	0	0					0	0	0	0	0	12	0	0	0	0	0	0	36	14	0					37	0	3	14	9	0	0	0	62	8	0	0
0	0	0	1	2	14	0	0	0	0	50	0	0	0	0					0	8	0	0	0	0	21	0	0	0	0	0	8	1	0					28	0	0	30	10	0	0	0	13	12	0	0
0	0	0	33	0	2	0	0	0	1	109	2	0	0	0					1	0	0	0	3	7	0	0	0	0	0	0	0	48	0					9	0	11	15	16	0	0	0	23	2	0	3
0	0	0	4	0	0	28	0	0	0	0	0	0	0	0					0	1	0	0	0	0	0	0	0	0	1	0	0	9	0					45	0	1	5	0	0	0	0	22	0	0	0
0	0	0	4	0	0	1	0	0	0	5	0	0	27	0					0	1	0	0	0	0	0	0	0	0	0	0	0	0	0					0	0	0	0	1	0	0	0	0	0	0	14
0	0	0	6	0	0	5	0	0	0	4	0	0	1	0					0	0	0	0	0	29	0	0	0	0	0	0	7	0	0					0	0	0	0	0	0	0	5	24	0	0	3
0	0	5	0	0	0	0	0	0	11	9	1	0	33	0					0	25	0	0	0	0	0	0	0	2	0	0	0	0	0					0	0	48	0	0	0	24	0	6	0	0	0
0	0	2	0	0	0	0	0	0	1	22	1	0	7	0					0	2	0	0	0	3	0	0	0	0	0	0	1	0	4					18	0	1	0	0	0	0	0	15	0	0	1
0	0	0	0	0	0	1	6	0	0	0	0	0	0	0					10	0	0	0	0	0	0	0	0	0	0	0	0	0	0					0	0	1	0	1	0	0	0	15	0	0	0
0	0	0	0	0	0	1	0	0	0	4	0	0	0	0					15	0	0	0	0	0	0	0	0	0	0	0	2	0	0					0	0	0	0	24	0	0	24	1	4	0	0
0	0	0	0	0	0	0	2	0	0	17	0	0	1	0					0	6	0	0	8	0	0	0	0	0	0	0	0	0	0					0	0	0	0	4	0	0	1	10	1	0	0
0	0	0	0	0	0	2	0	0	0	7	0	0	0	0					9	1	0	0	0	0	0	0	0	0	0	0	2	0	0					0	0	0	0	0	0	0	3	61	0	0	0
0	0	0	0	0	0	2	3	0	0	10	0	0	0	0					0	6	0	0	0	0	0	0	0	0	0	8	0	0	0					50	0	0	0	0	0	0	7	1	0	0	0
0	0	0	0	0	0	3	7	0	17	73	1	0	2	0					0	1	0	0	0	0	0	0	0	0	0	18	0	0	4					10	0	11	0	0	0	0	2	35	0	0	0
5	0	0	0	0	0	12	7	0	25	6	1	0	3	0					0	0	0	0	40	2	0	0	0	0	0	0	54	0	0					0	0	5	0	0	11	0	0	26	0	0	0
5	0	0	0	0	0	22	7	0	0	10	0	0	0	0					0	0	0	0	12	16	0	0	0	0	0	3	7	0	0					0	2	0	1	0	1	0	0	14	0	1	0
4	0	0	0	0	0	0	0	0	0	13	0	0	0	0					3	5	0	0	0	0	0	0	0	0	0	0	0	0	0					0	0	0	0	0	1	1	14	2	0	14	0
32	0	0	0	0	0	0	13	0	0	8	0	0	0	0					0	0	0	0	15	0	0	0	0	0	0	1	0	0	0					0	0	103	0	0	0	0	0	44	0	0	0
0	0	0	0	0	0	0	1	0	0	0	0	0	8	0					0	0	0	0	17	0	0	0	0	0	0	4	0	0	0					4	0	24	0	0	0	0	0	19	0	0	0
0	0	0	0	0	0	0	1	2	0	45	0	9	0	0					0	0	0	0	0	0	0	0	0	0	0	6	6	0	0					8	0	40	0	0	9	0	0	20	0	0	0
0	0	0	0	6	0	0	23	1	23	0	0	0	4	0					5	3	0	0	0	0	0	8	0	0	0	0	0	0	0					15	16	0	0	0	11	0	0	31	0	0	0
6	1	3	1	22	17	2	13	21	30	8	3	10	2	4					14	9	70	0	6	0	5	2	3	0	0	24	26	0	47					17	0	6	3	34	49	5	242	26	2	41	7
4	0	10	0	6	19	19	13	4	17	0	0	16	6	0					39	3	73	0	8	19	19	0	0	0	0	0	42	0	39					6	0	11	79	0	28	1	0	0	5	0	0
1	0	20	45	21	19	6	13	0	13	5	0	16	13	12					0	0	86	10	0	9	42	2	0	0	5	0	165	32	32					3	0	7	5	0	48	84	0	48	0	0	2
0	4	9	189	4	3	12	13	2	2	11	0	30	16	63					28	5	22	3	0	4	3	19	0	0	35	0	75	16	49					39	0	1	0	0	1	8	0	1	0	0	2
0	18	4	0	13	3	10	4	16	15	2	1	0	15	42					69	0	3	0	45	21	5	1	0	8	0	3	115	0	0					1	0	2	0	59	24	0	3	1	0	0	4
0	30	0	17	12	2	5	25	3	19	3	0	0	57	16					4	8	7	0	0	18	0	8	0	0	42	42	35	2	0					3	0	33	0	4	62	0	160	0	0	0	3
0	18	3	93	20	2	20	5	9	13	12	0	7	19	25					33	2	50	0	0	0	13	6	0	0	23	7	124	39	49					18	0	29	50	9	20	0	1	0	0	2	6
0	2	0	13	12	9	0	10	1	3	7	0	0	8	16					61	1	91	4	0	8	0	36	0	0	50	3	6	20	9					11	0	36	17	0	2	0	33	0	0	1	1
0	149	3	26	1	2	25	11	0	7	11	0	0	14	29					56	8	7	17	0	0	20	24	70	0	7	0	63	20	30					2	0	4	0	33	0	0	36	0	0	0	2
0	19	0	59	19	0	63	4	20	2	0	0	0	13	24					10	0	9	13	0	12	40	6	8	0	49	0	50	28	19					1	0	6	2	0	7	0	6	1	0	16	3
0	19	0	0	34	19	63	8	0	9	20	1	0	12	20					5	1	105	1	0	3	15	26	6	0	26	0	18	8	25					36	0	2	0	0	13	7	19	0	0	14	0
0	0	19	41	0	15	43	5	0	6	5	0	6	10	9					14	1	33	140	17	0	0	18	0	0	70	0	82	0	28					35	0	14	0	23	3	0	16	1	0	0	4
0	0	93	0	2	1	0	0	0	3	50	0	21	30	17					41	0	45	34	9	14	5	14	0	62	69	29	53	0	4					27	0	37	57	0	1	0	0	0	0	0	4
0	0	11	9	0	0	33	3	5	5	13	0	19	37	2					30	3	2	37	4	0	6	27	21	37	21	51	9	0	88					3	0	25	15	0	4	0	9	0	0	42	1
0	0	14	2	7	2	4	4	0	4	11	0	0	1	1					62	6	7	0	12	0	6	5	4	0	1	0	12	0	17					7	0	0	0	0	10	0	46	24	0	27	0
0	0	3	53	30	23	0	3	0	8	8	0	7	9	0					7	7	26	91	0	0	5	50	0	0	9	0	64	0	22					28	0	11	15	5	31	0	0	4	0	59	0
0	0	22	20	0	9	2	2	0	3	2	0	0	3	0					21	5	0	19	0	0	15	4	0	0	37	0	13	0	79					0	7	23	0	10	0	0	0	26	0	22	0
0	0	7	85	7	54	0	2	0	0	4	0	0	10	0					31	4	98	43	41	0	61	29	0	26	17	6	38	0	0					4	0	9	0	0	0	0	70	24	0	0	0
0	0	0	3	25	1	0	7	0	0	9	0	0	1	0					139	0	19	24	55	59	10	21	0	0	70	0	58	0	25					1	0	1	0	3	0	0	19	1	0	0	0
0	0	0	6	0	0	51	4	0	0	29	0	0	4	0					13	7	74	40	0	12	15	0	0	9	87	0	67	8	22					2	0	1	0	1	0	0	2	11	0	4	0
0	0	2	0	0	0	18	16	0	1	27	3	0	12	0					12	0	0	0	0	0	52	2	0	69	1	7	34	26	17					4	0	0	0	16	0	4	0	50	0	0	0
7	6	31	0	0	50	19	53	4	9	21	0	1	1	0					64	4	12	2	5	0	0	2	105	65	0	0	15	17	55					1	0	3	0	13	1	3	0	2	0	0	0
0	30	24	25	33	0	58	7	0	8	9	0	0	0	1					54	3	28	0	34	0	3	0	7	0	24	0	22	2	128					1	0	28	0	20	0	0	0	3	4	0	2
15	2	9	46	0	32	13	0	0	0	9	0	27	1	0					113	0	38	5	16	1	2	0	43	3	1	1	33	0	1					1	0	0	0	17	0	61	0	1	2	0	2
0	4	18	31	18	20	52	0	5	19	31	4	19	11	23					44	7	47	13	24	34	18	5	18	9	27	10	60	2	21					9	71	11	4	19	1	5	84	127	4	47	9
4	19	27	2	2	17	7	0	5	26	37	0	21	3	92					16	2	4	5	9	23	24	0	4	1	38	0	9	13	56					15	14	9	29	41	3	9	33	45	0	4	7
1	7	36	0	0	14	4	0	0	16	6	4	2	3	46					41	5	14	2	8	0	4	3	0	0	8	0	70	20	4					31	14	1	48	26	19	50	46	11	0	1	3
4	5	4	0	0	19	0	0	0	0	11	0	0	0	6					14	4	3	0	3	4	0	1	0	0	0	0	20	111	0					16	1	0	22	47	1	3	50	34	0	47	6
6	0	0	2	0	7	0	0	10	0	48	0	0	0	0					1	8	0	3	4	2	0	2	0	3	1	0	33	6	0					6	37	2	3	30	20	1	21	46	6	0	3
0	0	0	0	0	8	0	0	5	0	37	2	26	0	0					6	7	4	40	2	2	13	0	0	0	4	0	50	12	0					41	30	0	4	21	12	69	139	18	3	8	5
0	0	0	0	10	0	0	0	17	0	9	0	0	0	0					0	8	25	0	0	0	1	2	0	0	0	0	10	1	0					3	7	24	44	9	2	0	16	6	0	0	1
0	0	0	0	0	2	0	0	2	0	0	0	24	0	3					6	7	8	5	44	3	0	2	6	0	30	0	10	0	63					0	1	5	28	15	0	84	0	24	4	0	19
0	0	0	0	0	2	0	0	13	0	20	2	60	0	0					22	9	10	1	0	43	1	0	23	2	0	0	8	0	1					6	11	16	8	56	14	0	4	66	20	0	2
0	0	4	23	0	0	0	0	0	0	16	0	0	1	12					7	5	6	8	4	1	0	0	7	0	7	0	20	11	0					28	1	4	5	70	41	3	25	2	4	0	0
0	0	1	8	2	0	0	0	19	0	0	0	0	0	0					0	19	0	10	0	0	0	0	0	0	0	0	0	1	0					2	7	2	0	18	23	7	13	8	10	0	2
1	0	0	50	0	0	0	0	0	0	5	11	0	0	0					0	16	0	4	0	0	1	0	0	0	0	0	0	1	0					4	26	8	37	22	1	3	23	18	9	0	3
17	0	0	2	0	0	10	0	16	0	2	1	4	0	0					0	5	0	0	1	0	1	0	0	0	0	0	0	0	0					4	18	27	47	4	19	0	20	13	12	0	1
0	0	1	0	0	0	0	0	5	0	12	0	3	0	0					0	3	0	6	0	0	16	0	0	0	0	0	1	3	0					40	23	3	3	23	44	0	5	51	1	0	1
3	0	0	0	0	0	13	0	0	0	2	0	2	1	0					1	2	0	0	0	0	3	0	0	0	0	0	0	0	0					14	0	55	0	0	7	0	1	35	1	0	1
0	0	0	0	0	0	8	0	0	0	30	0	0	0	0					0	2	0	0	0	0	0	1	0	0	0	0	3	0	0					6	0	0	3	7	1	0	4	5	1	0	2
9	0	0	0	0	1	0	0	0	0	6	3	3	0	0					36	3	0	0	0	0	0	0	0	0	0	0	0	2	0					0	3	6	4	6	9	0	1	24	26	0	0
0	0	0	6	0	0	0	0	0	0	11	0	0	0	0					0	0	0	0	0	0	3	0	0	0	0	0	0	0	0					3	37	37	10	12	1	0	41	22	2	0	5
17	0	0	116	0	1	16	0	0	0	25	1	0	0	0					0	8	0	0	0	0	0	0	0	0	2	1	0	0	0					11	5	0	17	21	5	0	15	2	2	0	0
8	4	0	2	0	0	2	0	0	0	2	1	9	0	0					0	0	0	0	0	0	0	0	0	0	0	0	4	0	0					4	67	1	26	2	4	0	22	10	1	56	3
2	0	3	0	0	0	22	0	1	9	2	0	10	4	0					0	2	2	0	0	0	0	0	0	0	0	0	8	6	0					11	1	3	8	0	2	0	24	76	7	0	1
1	0	0	0	0	62	13	0	1	8	0	0	0	0	4					0	2	0	0	0	0	2	4	0	0	0	0	0	0	0					12	38	39	7	4	1	3	10	26	1	19	0
0	0	0	0	0	0	15	0	0	2	0	0	0	0	10					0	1	0	0	0	0	0	0	0	0	0	0	0	0	5					0	3	5	0	24	6	0	61	2	4	0	0
0	0	0	2	0	0	0	0	0	0	1	0	6	0	2					0	1	4	0	0	0	0	0	0	0	0	0	0	0	4					0	9	0	0	22	1	0	2	2	1	23	36
4	1	6	11	1	13	10	0	9	48	4	0	14	1	15					10	1	14	2	6	17	25	4	0	8	2	9	3	0	113					13	0	0	21	3	3	0	5	3	31	18	4
13	1	1	11	48	13	17	0	3	20	5	1	6	0	37					21	0	15	0	116	3	2	1	0	0	35	18	8	5	6					2	0	0	0	0	6	1	0	0	2	0	1
31	0	1	5	5	9	31	0	14	18	1	1	2	0	17					11	2	66	0	0	2	9	1	0	1	84	0	16	0	0					2	0	0	0	1	27	0	0	2	0	0	0
19	7	6	2	2	19	9	0	4	20	9	0	8	0	16					4	15	5	0	33	1	1	1	3	39	103	0	9	10	0					0	0	0	1	0	12	1	0	0	0	0	7
7	12	12	1	11	6	0	0	11	15	6	0	3	0	5					48	6	40	0	2	14	2	0	0	0	108	3	12	38	11					2	15	0	1	6	1	41	0	0	0	42	0
13	37	11	2	10	6	0	0	2	18	13	0	2	0	14					8	7	2	92	0	3	6	5	13	0	40	0	1	0	8					1	0	0	0	16	29	12	0	0	0	0	0
19	35	22	0	6	7	0	0	11	9	4	0	2	1	32					45	3	16	1	9	0	2	0	0	0	79	0	43	1	0					2	0	0	0	4	2	0	5	2	0	0	0
13	14	0	4	15	5	19	0	6	8	15	2	0	1	0					20	5	28	1	1	0	56	24	2	0	65	7	14	0	0					1	0	0	0	0	0	0	76	3	2	0	0
11	0	11	26	4	0	0	0	11	1	4	1	2	0	2					14	2	33	78	6	22	20	20	23	0	60	48	20	0	38					0	0	3	0	0	20	0	207	0	0	0	0
8	0	3	1	0	0	75	0	6	0	17	0	0	10	1					24	4	71	4	7	4	10	35	4	0	48	3	4	0	0					1	0	2	10	0	4	0	252	0	0	0	3
13	0	8	93	16	32	0	0	0	9	7	0	0	9	6					14	3	12	5	0	14	70	2	0	0	20	0	31	0	0					0	0	36	4	0	5	0	10	0	0	0	1
15	0	0	2	8	0	1	0	16	5	1	0	0	11	18					21	3	24	3	0	57	1	5	0	5	88	66	5	0	24					1	0	15	0	0	31	6	34	16	8	0	2
0	0	0	5	0	71	3	0	15	18	6	4	5	0	20					32	6	15	34	10	63	6	0	0	0	32	55	54	0	0					27	0	1	2	0	6	0	0	1	0	0	5
4	4	16	15	1	1	0	0	7	19	1	0	1	0	0					9	7	6	4	0	4	15	20	0	55	49	75	8	0	1					1	2	3	3	10	16	2	24	1	0	0	11
5	11	20	20	2	0	26	0	21	26	0	0	0	0	10					4	8	36	12	2	9	10	12	0	10	64	7	70	0	6					3	1	1	41	33	1	10	74	2	0	50	28
2	7	0	28	0	0	9	0	6	15	1	1	22	7	0					43	0	36	0	14	15	28	0	23	1	22	53	29	0	30					1	39	2	31	1	0	8	66	0	0	1	72
6	3	24	11	14	0	0	0	11	5	1	2	0	0	0					40	0	14	29	2	0	51	13	2	0	0	6	10	0	15					2	0	0	3	2	8	8	37	12	0	0	1
31	2	4	1	0	2	2	0	3	0	25	0	0	0	23					76	5	11	37	0	0	48	44	8	0	54	3	29	7	3					7	2	20	2	0	0	2	68	1	2	0	10
8	0	0	1	10	21	0	0	0	0	2	1	0	0	0					10	4	61	0	15	0	22	1	0	0	44	28	57	0	4					4	0	0	1	0	1	16	58	2	0	0	11
2	8	6	0	4	0	44	0	5	1	2	3	0	0	9					27	1	77	33	32	0	5	29	0	0	84	47	20	0	0					2	1	45	0	70	1	4	5	33	0	0	1
10	0	0	3	2	0	0	0	10	12	2	0	2	0	16					17	14	13	16	9	70	0	0	0	0	20	0	0	0	8					5	0	1	0	43	61	63	10	1	0	0	17
6	1	1	3	0	0	16	0	56	0	0	1	0	0	46					25	0	3	0	9	10	0	0	0	0	0	0	0	0	0					16	3	0	1	0	1	6	31	39	0	69	1
12	3	0	1	0	0	47	0	4	0	3	0	39	0	0					56	4	8	4	2	0	0	8	0	0	1	4	0	0	0					12	0	1	5	13	0	1	0	0	4	0	1
5	4	1	17	17	5	21	0	8	4	25	2	2	0	9					28	11	70	4	1	3	0	2	6	0	2	15	0	0	0					13	0	43	0	0	0	0	9	1	0	0	2
13	21	21	44	10	11	27	0	19	20	34	0	70	0	5					58	8	27	31	1	8	15	20	4	19	20	20	7	15	5					49	17	40	57	4	2	3	1	29	13	23	11
5	12	44	7	6	20	19	0	22	0	91	0	15	0	16					5	13	0	29	0	21	8	6	0	5	3	0	5	1	4					14	13	0	34	4	7	2	29	29	2	21	7
6	1	22	2	4	16	15	0	14	0	7	2	10	3	14					14	27	7	5	7	4	1	0	0	0	0	0	6	0	7					1	21	38	40	27	0	1	6	17	2	1	2
8	0	0	2	6	15	36	0	27	0	111	2	10	0	9					0	4	11	0	6	0	7	0	0	0	0	0	5	0	13					7	29	4	8	18	1	0	4	35	0	16	3
1	2	3	0	1	10	0	0	0	10	1	0	0	0	1					7	6	0	13	15	15	19	0	0	0	12	0	11	0	1					4	1	15	44	23	10	0	41	19	0	0	1
3	0	0	0	1	8	0	0	0	1	0	0	7	0	12					31	2	0	0	20	3	3	0	0	3	2	0	6	4	22					0	0	9	6	11	0	0	97	15	3	20	5
0	0	0	0	0	7	0	0	0	4	0	0	19	0	6					4	3	0	14	2	0	11	0	0	6	19	0	8	0	2					16	49	11	37	16	1	6	41	8	5	10	19
5	1	0	5	0	7	0	0	0	0	5	0	6	0	0					0	6	0	0	0	6	6	0	0	9	1	1	0	3	30					11	3	28	24	11	0	0	13	31	39	0	0
0	0	0	0	0	3	0	0	0	9	0	0	32	0	0					0	0	0	0	0	0	3	0	0	5	0	0	1	0	0					2	8	20	1	4	0	63	35	15	1	28	1
5	0	0	3	0	4	0	0	0	8	0	0	1	0	21					2	3	0	0	0	0	0	0	0	41	0	0	1	5	1					6	5	14	4	58	0	1	25	9	2	32	1
4	0	0	0	0	0	0	0	0	2	0	0	11	0	1					0	1	0	0	0	5	0	0	0	13	0	0	0	19	0					19	19	32	33	1	0	0	16	8	0	0	1
8	0	0	0	0	1	0	0	0	0	0	0	0	0	0					4	2	0	0	0	0	2	0	0	40	0	0	0	11	0					14	11	0	22	3	0	0	15	20	2	0	2
7	0	0	0	1	0	3	0	0	0	16	0	17	0	0					0	3	0	0	0	0	7	0	0	4	0	0	0	0	12					20	0	0	29	6	0	0	30	8	0	8	4
8	0	0	0	1	0	12	0	0	8	0	0	1	0	0					3	3	0	9	0	0	0	0	0	13	2	0	0	0	0					1	1	2	2	17	0	0	9	13	5	4	1
2	0	0	0	0	1	1	0	0	3	0	0	6	0	0					4	7	0	0	0	0	0	2	0	6	0	0	0	0	0					0	1	7	11	0	0	7	20	6	0	13	3
0	0	4	1	0	0	0	0	0	10	0	0	3	0	4					0	5	0	0	0	0	0	0	0	15	0	0	0	0	23					32	17	2	0	2	0	2	3	5	63	0	1
2	0	2	0	0	0	0	0	2	6	0	0	0	0	62					0	0	0	0	0	0	0	4	0	0	0	0	0	0	1					10	0	0	0	9	0	6	8	31	0	8	6
5	0	2	1	0	0	0	0	0	9	0	0	0	0	12					0	2	0	0	0	0	2	0	0	0	0	0	0	0	0					1	1	0	9	1	0	0	4	29	0	5	0
20	0	0	0	0	0	4	0	0	8	0	0	0	0	15					0	15	0	0	0	0	4	0	0	0	0	0	0	0	1					0	77	19	2	3	0	4	1	55	0	23	1
0	0	0	2	1	0	0	0	0	4	0	0	3	0	0					0	6	13	0	0	0	1	0	0	0	0	0	0	0	0					2	2	0	5	42	0	0	49	27	1	0	1
0	0	0	0	1	0	0	0	0	11	0	0	0	4	10					0	6	0	0	0	0	0	0	0	0	0	0	0	0	1					0	0	4	0	0	0	0	45	40	1	0	3
0	0	0	0	0	0	0	0	3	6	0	0	0	2	1					0	8	10	0	0	0	0	0	0	0	0	0	0	0	0					12	0	6	0	0	0	0	7	12	17	4	0
2	0	0	0	0	0	0	0	1	0	0	0	12	0	6					0	0	3	0	0	0	1	0	0	0	0	0	0	0	0					2	0	0	5	28	0	0	47	4	0	7	2
0	0	0	0	0	0	0	0	0	4	0	0	50	0	0					0	20	8	0	0	0	0	0	0	0	0	0	0	0	0					1	22	0	29	2	0	0	55	6	0	16	1
[truncated: 4 more columns]

## Sheet: Figure 6D
Figure 6D Midline crossing activity
DMSO																			100 uM Amitraz																				1 mM Amitraz
31	45	15	16	19	0	3	22	1	36	23	21	0	0	35						8	0	28	2	3	3	20	7	16	0	72	0	22	43						21	0	16	14	8	48	28	16	1	47	4
0	10	6	15	23	0	0	1	0	6	4	4	0	0	28						0	0	15	0	0	0	0	0	13	0	47	0	4	6						10	0	0	7	0	26	1	0	23	0	0
0	0	0	8	0	0	0	12	0	0	0	0	0	0	6						0	0	0	0	1	0	0	0	0	0	24	0	0	0						42	0	3	4	0	1	0	0	20	0	0
0	0	0	0	28	8	0	5	0	14	0	0	0	0	0						0	0	0	0	0	0	0	0	0	1	25	0	1	0						26	0	0	26	0	9	0	0	0	0	0
0	0	0	0	0	10	0	0	0	47	0	0	0	0	0						0	0	0	3	0	0	0	0	2	0	2	0	0	0						3	0	0	0	0	0	0	0	0	0	0
0	0	0	1	0	47	0	0	0	8	0	0	4	0	0						0	0	0	0	0	0	0	0	2	0	0	0	3	0						0	0	0	0	0	1	6	0	38	0	0
0	0	0	0	0	35	0	20	0	1	0	0	0	0	0						0	0	3	0	0	0	0	0	12	7	0	0	0	0						0	0	0	0	0	3	2	14	17	0	0
0	0	0	0	0	0	0	22	0	13	0	0	0	0	0						0	64	0	0	0	3	0	9	8	0	0	0	0	0						0	0	0	1	0	8	0	0	35	0	0
0	0	0	0	0	0	0	13	0	0	0	0	0	0	35						0	5	0	0	3	11	1	0	0	0	0	0	0	0						1	0	0	1	3	0	0	0	24	0	0
0	0	0	0	0	0	0	21	0	0	0	0	0	0	0						0	0	0	0	11	0	0	0	0	0	0	0	0	0						0	0	0	1	4	0	0	0	0	0	0
0	0	0	0	0	0	0	0	0	0	0	0	0	0	32						0	0	0	0	1	0	0	13	1	0	0	0	0	0						0	0	0	0	12	0	0	0	43	0	0
0	0	0	0	0	5	0	0	0	0	0	0	0	0	25						0	0	0	0	4	18	0	3	0	0	0	0	56	0						0	0	0	0	0	0	0	0	0	0	0
0	0	0	0	0	0	0	0	0	0	0	0	0	0	47						0	0	0	0	2	0	0	6	4	0	0	0	44	0						0	0	0	0	0	0	0	0	0	0	0
0	0	0	0	0	1	0	0	0	0	0	0	2	0	2						0	0	0	0	0	0	0	0	0	1	0	0	0	0						0	0	0	0	0	0	6	0	0	0	0
0	0	0	0	0	1	0	0	16	0	0	0	2	0	7						0	0	0	0	0	7	5	0	1	0	0	0	0	0						0	0	0	0	0	0	22	0	0	0	0
0	1	0	0	0	15	0	0	41	0	0	0	2	27	0						0	0	0	0	0	0	0	0	0	0	0	0	0	0						0	0	0	1	0	0	16	0	3	0	0
0	0	0	0	0	1	31	0	17	0	0	0	0	0	6						0	0	0	0	0	0	0	0	0	0	0	0	0	0						0	0	0	0	0	0	59	0	3	0	0
0	0	0	0	0	5	0	0	0	0	0	0	0	0	0						0	0	0	0	0	0	6	0	1	0	0	0	1	0						0	0	0	7	0	0	13	0	0	0	0
0	0	0	0	0	1	0	0	0	0	0	0	0	0	0						0	0	0	0	0	0	14	0	0	0	0	0	0	0						0	0	0	10	0	0	0	0	0	0	0
0	0	0	32	0	30	0	0	0	0	0	0	0	0	0						0	0	0	0	0	0	1	0	0	0	0	0	0	0						0	0	0	7	0	0	6	0	0	0	0
0	0	0	0	0	0	10	0	0	0	0	0	0	0	0						0	0	0	0	0	0	56	0	0	0	0	0	0	0						0	0	0	0	0	0	30	0	0	0	6
0	0	0	0	0	0	20	0	0	0	0	0	0	0	0						0	0	0	0	0	0	5	0	0	0	0	0	0	0						0	0	0	0	0	0	12	0	0	0	27
0	0	0	0	0	0	12	0	0	0	0	7	0	0	0						0	0	0	0	5	0	8	0	0	0	0	0	0	11						0	0	0	0	0	0	30	0	0	0	0
0	0	0	0	0	0	42	0	0	0	0	0	0	0	68						0	0	0	0	26	0	1	0	0	0	1	0	0	0						0	0	0	0	0	0	0	0	4	0	0
13	2	6	11	10	0	9	4	70	1	8	5	6	1	1						18	83	1	27	28	0	71	4	7	6	0	0	77	4						5	0	0	2	2	14	46	12	11	41	15
9	0	15	24	32	0	3	20	5	16	39	0	0	43	0						2	74	0	42	0	0	50	0	0	0	0	4	60	0						1	3	0	32	0	6	55	14	29	32	55
0	53	7	10	2	0	9	0	0	9	17	13	0	33	0						3	1	0	20	24	1	82	44	31	0	68	0	16	0						3	4	0	48	0	10	0	49	1	17	10
20	24	13	11	15	0	15	29	13	3	21	42	0	14	22						1	2	0	4	25	0	62	43	6	0	1	0	19	7						13	28	0	0	0	45	74	44	8	32	21
53	11	26	10	0	0	6	7	25	14	32	21	0	23	23						4	4	25	28	0	0	47	17	1	23	5	0	0	0						8	0	49	11	16	1	32	37	2	6	0
35	31	45	6	5	0	14	5	0	3	17	16	0	31	67						8	1	47	15	0	0	71	16	58	53	54	0	19	0						2	0	14	38	3	20	46	28	43	1	13
56	50	4	0	9	0	6	12	15	10	19	8	0	36	1						3	0	4	24	62	0	37	15	16	12	9	0	21	0						11	0	31	40	0	28	17	22	7	127	97
56	9	8	0	14	0	6	0	0	17	19	3	0	26	57						50	0	0	12	0	0	24	0	16	58	23	0	96	0						7	0	20	57	0	16	124	67	6	127	0
48	9	41	2	9	0	5	4	26	9	17	1	0	19	1						11	0	0	30	0	10	33	7	25	16	23	0	16	0						3	0	0	37	0	9	23	38	18	10	0
42	0	15	17	3	0	7	0	14	8	3	10	0	5	0						29	19	0	0	14	19	8	5	31	11	52	0	16	0						3	9	0	0	0	15	70	39	0	145	0
7	4	7	6	40	0	4	0	108	5	12	5	0	0	7						7	40	0	32	37	45	49	14	59	42	5	63	61	32						0	1	0	2	3	52	9	108	5	90	52
0	15	14	2	17	0	8	22	76	26	5	25	0	5	17						16	0	0	41	11	21	25	0	22	27	0	1	31	0						27	0	0	1	28	5	56	17	34	165	0
93	4	9	27	0	0	3	10	35	3	42	0	0	1	58						40	18	0	27	0	0	14	0	74	56	5	0	0	69						17	0	0	23	1	46	28	56	2	144	35
35	20	8	0	1	0	7	37	4	1	5	0	0	0	7						52	3	0	30	6	8	67	16	104	6	2	0	57	62						43	0	1	0	2	21	110	40	22	20	0
0	11	3	0	17	0	9	13	0	0	3	0	0	76	1						64	13	0	12	11	22	39	20	36	33	0	0	30	0						6	1	10	33	46	45	68	69	3	74	0
0	27	21	0	8	0	6	0	4	0	8	0	0	29	16						16	32	0	8	11	9	35	6	5	10	4	13	38	30						1	5	17	21	1	41	98	35	12	9	0
1	34	1	0	36	0	10	0	30	0	0	18	0	0	1						16	4	0	23	0	0	3	0	25	24	0	18	19	25						5	0	0	3	19	49	61	23	6	111	0
6	19	1	0	0	0	5	0	16	1	0	3	0	0	1						18	20	0	9	0	25	12	0	16	27	0	5	27	24						1	4	11	2	5	17	16	35	0	1	37
0	12	0	0	0	0	0	0	111	9	5	2	0	18	15						57	0	0	11	15	0	10	0	9	10	58	0	7	0						51	0	41	3	0	11	61	42	5	1	3
5	0	0	21	0	0	3	0	7	58	0	37	0	11	62						37	0	0	18	42	0	31	14	12	35	0	0	64	0						25	8	5	21	0	0	46	73	0	6	41
20	4	1	98	4	0	0	1	0	0	1	22	0	0	5						0	9	0	6	16	0	12	68	9	18	1	0	52	57						3	0	0	28	1	0	69	22	0	0	31
50	18	0	97	0	0	0	2	16	1	10	7	0	5	0						28	2	0	60	0	0	25	59	1	1	0	0	0	0						0	18	0	21	8	0	1	15	24	78	32
1	4	19	1	0	0	1	30	5	36	1	0	0	23	55						23	0	0	19	0	0	16	35	50	4	48	0	8	3						3	0	0	72	0	0	0	0	9	45	0
21	0	5	0	0	0	0	0	10	2	21	2	0	1	229						11	2	1	3	0	0	5	0	1	0	7	91	8	0						2	0	0	0	1	0	14	9	4	4	4
36	25	18	21	1	0	15	18	3	30	17	0	0	9	17						20	37	75	1	12	6	13	10	26	8	9	79	23	43						17	41	17	13	58	12	92	17	16	48	84
3	14	3	2	29	0	0	6	3	6	0	0	0	0	66						66	0	3	0	33	0	2	0	16	0	3	1	12	25						32	2	35	17	14	3	31	17	66	116	22
0	3	2	4	0	0	2	0	0	0	1	6	0	0	5						0	0	0	0	30	0	0	0	6	0	0	0	10	19						12	69	45	9	36	7	66	57	2	197	70
37	3	0	0	0	0	0	0	0	0	0	0	0	0	0						0	0	0	0	10	0	0	0	12	7	1	0	1	35						6	29	1	13	2	14	20	2	14	13	22
1	1	0	0	0	0	0	0	0	0	1	0	0	0	30						1	1	0	0	1	0	0	0	21	44	0	0	11	13						9	0	1	33	2	4	40	4	17	15	11
1	3	9	0	0	0	0	0	0	0	0	0	0	0	18						0	15	2	0	0	0	0	0	20	4	3	0	7	3						10	0	11	3	7	5	0	11	10	42	3
64	2	0	0	0	0	0	0	0	4	0	0	0	0	18						0	0	0	0	1	0	3	0	6	24	4	0	15	35						12	24	0	4	6	22	24	0	8	36	59
0	18	2	0	0	0	7	0	0	0	0	0	0	0	8						0	0	0	0	0	0	0	0	7	0	0	4	2	44						9	23	5	10	0	26	7	0	3	12	11
0	0	7	0	0	0	0	0	0	0	0	0	0	0	0						0	0	0	0	0	0	0	0	0	0	0	0	0	3						6	22	5	2	0	16	8	2	7	20	13
11	0	15	0	0	0	0	0	0	0	4	0	0	0	10						10	0	0	0	0	0	3	0	0	0	0	0	0	4						0	39	1	11	0	14	0	4	3	0	0
11	4	0	0	0	0	0	0	0	0	0	0	0	0	12						8	0	0	0	0	0	25	0	3	0	0	0	1	10						0	1	0	0	0	3	1	0	4	28	17
3	0	0	0	0	0	0	0	0	2	0	0	0	2	0						0	0	0	0	0	3	6	0	3	0	0	11	2	0						0	6	18	5	0	4	26	0	2	14	6
0	4	0	0	0	0	0	1	0	0	0	0	0	0	3						0	0	0	0	0	0	0	0	0	0	0	0	0	0						0	23	3	1	2	6	16	0	24	26	0
0	9	0	0	0	0	0	0	0	0	0	0	0	0	0						0	0	0	0	0	9	0	0	1	0	0	0	0	18						1	0	4	11	2	21	12	0	11	18	1
0	0	0	0	0	0	0	0	0	0	0	0	0	0	0						0	0	0	0	0	32	1	0	6	0	0	0	0	55						11	7	1	2	8	16	10	0	22	8	0
0	0	0	0	0	0	0	0	0	0	0	0	0	0	0						0	6	0	0	0	7	5	0	0	0	0	0	0	0						7	3	0	12	8	11	29	0	4	18	0
0	0	0	0	0	0	0	4	0	0	0	0	0	0	0						0	0	0	0	0	16	0	0	0	0	0	0	0	0						9	13	10	13	1	0	43	7	5	0	0
0	0	0	0	0	0	0	0	0	0	0	0	0	0	20						0	0	1	0	0	21	0	0	2	0	2	0	0	13						0	70	19	1	0	16	16	9	9	7	21
0	0	0	0	0	0	0	0	0	0	0	0	0	0	20						0	0	0	0	0	2	0	0	0	0	0	0	0	86						0	1	1	0	0	14	29	6	5	2	4
0	0	0	0	0	0	0	0	0	0	0	0	0	0	28						0	0	0	0	0	17	0	0	0	0	0	0	0	0						19	5	1	8	0	40	6	0	37	1	0
0	0	0	0	0	0	0	0	0	0	0	0	0	0	3						0	0	0	0	0	8	0	0	0	0	8	0	0	0						6	0	36	67	0	31	25	0	1	3	0
9	0	0	0	0	0	0	0	0	0	0	0	0	0	59						0	0	0	0	0	0	0	0	0	0	0	0	0	0						8	16	0	10	0	0	29	11	2	1	0
19	0	1	0	0	0	0	0	0	0	0	0	0	0	8						7	0	0	0	1	0	33	0	0	0	0	0	3	0						7	0	21	1	0	12	37	27	18	16	0
54	0	0	0	0	0	0	0	0	0	0	0	0	0	38						17	0	0	0	0	0	0	0	0	0	5	0	3	3						8	3	5	3	1	3	77	0	7	6	8
53	12	4	9	8	0	2	5	4	3	4	9	0	5	108						23	1	13	1	14	4	91	6	9	18	11	16	40	7						4	15	0	49	13	33	38	3	5	7	4
12	13	11	34	2	0	3	13	21	0	10	31	0	2	39						6	0	1	0	10	3	54	8	9	16	65	0	0	6						7	14	0	1	3	4	17	2	4	21	3
22	23	3	32	6	0	7	67	21	1	17	0	0	2	1						18	2	2	0	11	17	64	18	24	26	11	0	0	25						1	6	0	2	12	33	81	21	21	12	14
12	15	8	6	11	0	9	7	12	1	22	0	0	9	6						3	4	0	0	2	4	46	12	5	12	31	0	0	1						6	0	36	2	3	32	23	52	1	60	2
22	9	9	23	1	0	12	22	3	0	30	0	0	3	8						8	5	0	4	31	0	0	1	35	10	43	15	1	3						2	0	2	4	12	14	25	2	5	2	17
22	10	12	4	1	1	8	1	12	10	13	0	0	35	4						28	1	0	11	18	0	31	33	13	3	2	0	11	2						12	0	0	21	23	11	10	3	16	37	2
20	18	4	17	17	0	7	5	20	37	22	11	0	21	157						32	7	0	0	0	0	76	51	0	28	5	0	1	4						3	12	0	31	21	4	26	2	50	61	12
28	18	14	3	56	0	4	8	19	1	15	72	0	3	51						11	1	35	0	3	7	37	15	43	3	4	0	21	46						3	91	0	1	7	29	27	23	54	0	9
22	9	5	9	0	0	12	1	29	1	17	18	0	0	2						42	10	0	0	0	0	11	44	38	43	4	0	52	9						2	0	17	1	9	29	39	55	5	27	0
13	9	7	2	10	0	2	0	14	0	16	0	0	2	35						9	17	0	27	0	1	12	6	6	41	3	1	11	2						3	0	2	2	13	24	3	23	22	13	0
62	7	4	2	1	0	6	0	34	2	25	1	0	37	170						72	1	0	0	0	0	47	25	7	13	0	67	7	11						7	5	24	1	0	13	2	11	2	1	2
47	10	0	15	29	0	2	2	5	0	32	5	0	1	51						12	37	0	16	13	0	30	44	11	5	21	8	39	10						1	0	0	35	0	11	1	16	39	31	0
41	9	6	181	0	0	1	4	2	0	37	1	0	1	45						39	4	12	18	29	0	7	33	1	4	16	23	19	24						2	0	24	2	7	10	96	14	25	34	2
29	1	2	41	0	0	5	0	12	0	2	1	0	0	1						53	53	0	13	3	11	31	35	45	4	4	0	63	86						1	5	2	14	0	75	35	7	1	2	16
55	0	0	0	0	0	2	0	39	2	6	22	0	1	50						59	14	9	19	2	9	44	11	18	10	8	0	21	54						1	0	5	1	0	32	20	34	7	9	36
0	1	0	0	24	0	0	12	1	3	9	2	0	0	26						27	2	0	10	15	13	8	29	0	0	24	0	2	32						2	32	13	54	2	83	32	14	12	1	0
45	12	4	0	46	0	0	4	5	5	0	1	0	0	0						4	1	10	73	1	0	42	2	50	55	1	0	58	28						2	0	1	1	4	20	4	30	9	0	24
21	2	0	2	13	0	1	2	1	7	1	0	0	22	77						20	44	22	11	0	2	10	8	56	6	16	0	9	33						2	0	0	2	48	5	49	6	11	1	35
0	0	3	0	1	0	2	0	4	5	0	0	0	3	1						40	28	4	7	0	35	1	0	0	4	1	0	0	15						63	86	0	61	3	11	12	2	19	2	84
38	0	0	0	72	0	30	4	8	4	0	19	0	41	3						13	31	10	0	0	5	60	8	15	5	1	0	68	0						22	47	0	43	1	1	20	23	14	3	61
16	3	42	0	9	0	16	0	0	57	0	0	0	26	0						4	0	0	0	0	14	24	0	7	34	2	0	7	0						18	26	0	4	0	7	77	13	0	1	31
16	1	1	0	0	0	2	0	1	5	0	3	0	0	65						4	1	0	0	0	30	18	0	0	29	23	0	0	0						0	3	0	0	0	6	15	0	0	0	35
2	1	0	0	0	0	0	0	4	24	0	12	0	2	11						5	0	11	0	0	0	14	1	0	5	8	0	19	0						39	0	0	2	0	21	49	44	0	0	5
20	0	1	1	0	0	6	0	23	5	1	1	0	2	45						1	3	4	1	0	0	24	7	4	1	12	0	5	5						0	4	0	0	4	33	0	19	2	1	20
59	32	18	9	4	0	2	0	20	38	21	24	0	34	38						12	5	19	53	25	17	2	7	38	9	52	43	30	50						17	80	9	11	5	23	61	7	15	76	24
59	63	19	2	50	0	4	44	4	43	7	94	0	1	25						4	12	8	27	4	12	2	1	34	5	34	33	20	22						18	25	2	13	13	39	55	68	51	46	14
16	8	8	0	5	0	9	10	2	4	7	8	0	1	46						2	0	4	54	9	20	10	0	23	2	26	4	13	26						6	14	1	18	19	2	21	31	12	25	8
9	0	4	0	0	0	0	2	0	0	0	2	0	25	25						0	15	3	0	2	0	1	10	2	5	27	0	10	26						12	32	1	5	3	5	5	9	3	7	13
1	4	3	0	1	0	1	0	0	0	2	0	0	0	1						0	0	6	0	0	14	3	0	19	41	5	0	4	10						6	61	1	54	17	38	1	20	8	8	24
0	14	2	0	0	0	1	0	0	28	29	0	0	0	4						0	4	4	0	3	9	3	0	6	6	2	15	7	46						3	6	13	6	9	8	10	26	17	29	29
0	50	0	0	0	0	0	0	0	4	0	0	0	0	6						0	2	5	0	0	40	9	0	9	4	3	8	8	8						8	24	1	7	3	3	2	1	14	13	17
0	0	0	0	0	0	0	0	0	1	0	0	0	0	1						0	1	3	0	6	7	5	19	13	3	0	13	5	64						12	19	4	1	2	29	16	0	5	16	2
0	0	0	0	0	0	0	0	29	2	0	2	0	0	0						0	2	1	1	0	0	3	0	5	0	1	1	6	6						4	64	10	4	0	44	0	61	5	10	0
11	0	0	0	0	0	0	0	10	0	0	0	0	0	0						0	2	1	0	0	5	0	0	4	3	0	0	0	3						6	4	0	10	1	14	3	1	13	33	0
0	0	0	0	0	0	0	0	0	0	0	0	0	0	0						0	0	2	6	0	2	2	0	3	0	0	7	0	27						20	12	2	39	5	7	5	6	1	3	0
0	0	0	0	2	0	2	0	0	0	0	0	0	0	0						0	4	0	0	0	0	1	0	2	0	0	0	3	1						18	39	10	5	6	35	26	8	57	14	0
0	0	0	0	5	0	0	0	0	7	0	0	0	0	4						0	0	1	0	0	7	7	0	2	0	1	0	2	35						6	34	1	30	0	35	7	2	2	18	15
0	0	0	0	0	0	0	0	0	0	0	0	0	0	47						0	0	1	0	0	0	0	0	1	5	0	0	0	0						4	41	0	4	0	13	0	0	8	7	0
0	0	0	0	0	0	0	0	0	6	0	0	0	0	0						0	11	0	0	0	0	2	0	2	0	15	0	0	21						4	25	1	1	2	4	0	0	5	5	0
0	0	0	0	0	0	0	0	0	0	0	0	0	0	16						0	4	2	0	0	0	4	0	1	0	4	3	0	3						5	3	4	1	0	25	20	0	22	4	1
0	0	0	0	0	0	0	0	3	3	0	0	0	0	0						0	3	0	0	0	16	0	0	5	0	0	0	2	0						4	32	21	9	0	38	9	0	22	4	0
0	0	0	0	0	0	0	0	2	0	0	0	0	0	0						0	0	0	0	0	2	0	0	0	0	0	0	0	1						4	5	1	4	1	21	0	0	13	15	0
2	0	0	0	0	0	0	0	33	5	0	0	0	1	0						0	2	0	1	0	3	2	0	0	0	19	14	3	12						3	14	1	24	1	4	2	0	7	9	0
0	34	0	0	0	0	0	0	31	0	0	0	0	0	0						0	2	0	0	0	0	3	0	0	0	0	0	0	0						42	78	8	11	8	8	6	0	3	0	0
0	0	0	0	0	0	0	0	0	2	0	0	0	0	123						0	3	0	0	0	0	1	0	1	0	0	24	0	0						2	15	2	2	1	2	1	0	17	35	0
0	0	0	0	0	0	0	0	0	1	0	0	0	0	4						0	0	0	0	0	0	0	0	0	0	0	0	0	0						2	17	0	1	1	1	6	39	2	0	2
1	7	2	0	0	0	0	0	1	0	0	1	0	2	0						0	3	1	0	2	0	0	0	0	0	2	0	0	19						6	20	0	0	12	69	7	27	1	1	42
13	0	19	1	0	0	0	0	1	0	0	3	0	0	0						0	0	7	1	2	0	0	1	2	0	0	0	0	15						6	2	6	6	1	2	3	19	27	26	29
[truncated: 4 more columns]

## Sheet: Figure 6E
Figure 6E Midline crossing activity
DMSO																				100 uM Amitraz																			1 mM Amitraz
0	1	30	15	18	2	6	0	0	0	12	0	5	18	28	0					36	0	0	0	9	31	10	0	7	1	78	0	33	52	11					0	14	8	13	0	12	2	51	23	13	29
0	0	0	0	23	3	31	0	1	0	0	0	21	53	17	0					22	0	0	0	0	10	0	10	15	0	0	2	0	4	5					7	3	0	26	0	11	8	0	15	13	0
0	0	0	25	19	0	0	0	0	0	0	0	8	19	0	22					33	0	0	14	0	15	0	4	14	41	0	66	18	0	13					0	37	0	0	0	13	4	3	0	5	0
0	0	0	20	4	0	0	1	0	0	0	0	4	57	0	3					2	3	0	0	0	0	0	30	0	8	0	0	7	9	11					14	20	0	5	0	12	8	4	0	0	0
0	0	0	25	8	1	0	0	0	0	0	0	0	0	0	0					5	12	0	2	0	13	1	77	0	1	0	0	0	0	3					0	0	0	5	0	3	0	0	14	0	0
0	0	0	4	19	2	0	0	0	0	0	0	0	0	0	0					0	9	0	2	0	0	3	11	2	0	0	0	11	0	0					0	7	0	4	0	0	15	0	18	0	0
0	0	0	0	57	0	0	0	0	0	0	0	5	0	0	0					2	0	0	0	0	0	0	0	10	0	0	0	0	0	20					0	3	21	9	0	7	14	0	26	0	3
0	0	0	0	69	0	0	0	0	15	0	0	0	0	0	0					4	0	0	0	0	0	0	0	0	0	0	0	0	0	7					0	20	0	0	0	3	24	17	12	0	0
0	0	0	0	0	0	0	0	9	0	0	4	0	0	0	0					11	0	0	0	0	5	5	0	0	0	0	0	0	0	12					0	0	0	0	0	2	3	5	2	0	0
0	0	0	0	1	8	0	0	15	0	0	0	0	0	7	0					35	0	0	2	0	0	0	0	0	1	0	0	0	0	6					0	7	0	56	0	2	9	0	6	0	3
0	0	0	0	22	0	0	0	36	0	0	0	0	0	0	0					7	0	0	4	0	2	0	0	0	0	0	0	9	0	34					0	5	0	14	0	17	19	4	11	0	19
0	0	0	0	0	0	0	0	0	0	0	0	38	0	0	0					26	0	0	0	0	39	0	0	0	0	0	0	6	0	0					0	16	0	0	0	7	22	6	14	0	0
0	0	0	0	0	0	0	7	0	0	0	0	24	0	20	9					0	0	0	2	0	15	4	0	0	11	0	0	0	0	6					0	4	0	0	0	2	5	0	18	0	8
0	0	0	0	0	0	0	0	0	0	0	0	39	0	26	37					26	0	0	2	0	0	0	0	0	13	0	0	0	0	32					0	12	0	10	0	2	3	0	2	0	0
0	0	6	0	0	0	0	1	0	0	0	0	0	0	12	0					22	0	0	7	0	23	0	0	0	0	0	0	0	0	53					0	9	0	0	0	3	4	0	24	0	0
0	0	0	0	0	2	0	0	0	0	0	0	10	0	8	0					3	0	0	3	0	2	0	6	0	0	0	0	0	0	3					0	7	0	31	0	4	8	0	3	0	10
0	0	0	0	3	0	0	0	0	0	0	0	0	0	2	0					1	0	0	9	0	0	0	17	0	0	0	0	0	0	6					0	18	0	16	5	0	11	0	13	0	0
0	0	0	0	9	13	5	0	0	0	0	0	0	0	30	0					0	0	0	9	0	0	0	0	0	0	0	0	24	0	29					0	7	0	2	0	5	4	0	0	0	0
0	0	0	0	5	9	3	0	0	9	0	0	0	0	4	0					0	0	0	6	0	0	0	0	0	0	0	0	0	10	29					0	8	0	0	0	3	5	0	0	0	0
31	0	0	0	3	1	7	0	0	1	0	0	0	0	0	0					0	0	0	2	0	0	0	0	0	0	1	0	8	2	3					0	11	0	0	0	4	6	0	0	0	0
1	0	0	0	42	0	0	0	0	3	0	0	0	0	0	0					3	0	0	0	0	0	0	1	0	0	1	0	0	0	17					0	7	0	0	0	4	14	5	22	1	0
57	0	0	0	12	12	1	0	1	0	0	0	0	0	2	0					0	1	0	0	0	0	0	4	0	0	11	2	0	0	53					0	11	0	0	0	1	3	24	0	0	0
32	0	0	0	11	0	6	0	0	0	0	0	0	0	22	0					0	0	3	0	0	0	0	2	0	0	0	0	5	0	43					0	0	0	0	0	0	8	0	0	0	0
51	0	0	0	21	0	0	0	0	0	0	0	0	0	0	0					0	0	20	28	0	0	0	36	0	0	0	0	0	0	29					0	0	0	0	7	12	25	0	0	0	0
57	0	12	17	6	26	7	0	10	5	0	0	45	12	14	10					38	2	12	0	0	0	20	1	0	7	31	19	11	0	110					1	10	3	20	101	8	8	13	37	7	38
29	6	0	2	0	39	0	0	43	1	0	0	0	10	22	0					7	2	7	1	1	0	3	43	6	1	69	62	28	0	0					0	17	0	0	2	6	3	0	4	4	13
20	20	0	0	0	12	10	0	0	0	0	16	7	4	40	0					4	0	11	4	27	1	0	10	14	27	2	0	1	3	0					0	0	0	0	0	4	12	24	54	2	9
2	3	0	0	0	22	0	2	0	9	0	2	0	7	22	1					20	0	5	2	0	9	72	89	3	18	19	3	0	0	1					0	0	0	0	0	27	9	13	28	26	16
24	22	0	0	0	22	0	0	4	1	0	1	0	12	21	1					18	3	39	20	17	88	30	13	14	26	13	8	0	0	0					0	0	0	0	0	0	7	0	0	3	12
5	0	0	0	0	5	19	0	6	6	0	3	0	9	10	0					4	7	5	1	30	13	13	72	0	9	47	6	0	5	1					0	14	7	0	0	5	1	45	28	54	13
12	13	0	0	0	12	5	0	0	11	0	0	0	11	17	11					33	20	6	8	0	2	0	100	5	2	31	40	18	11	11					0	12	0	61	47	33	30	5	11	8	6
4	12	0	0	29	0	0	0	0	12	0	0	0	38	7	1					17	0	6	4	0	0	0	7	90	23	29	0	12	11	3					9	0	3	0	0	0	2	30	12	11	21
0	5	0	0	9	1	0	0	0	16	0	0	0	16	11	0					4	0	6	4	1	0	52	35	36	7	47	6	0	24	65					21	11	0	85	5	29	7	50	13	40	27
5	0	0	0	0	57	0	5	0	30	0	15	0	0	37	2					1	4	42	6	0	15	0	40	0	31	7	0	48	5	56					20	0	0	76	7	32	12	6	40	35	3
17	0	0	0	24	6	0	0	0	5	0	5	10	1	12	0					2	0	0	16	57	10	1	14	0	9	20	67	50	10	68					53	4	62	6	4	9	2	0	14	8	8
0	0	6	0	23	3	0	0	0	0	0	1	69	0	21	0					0	0	0	3	3	1	64	33	54	23	25	8	8	72	3					0	0	37	1	6	2	18	30	3	19	26
0	0	27	0	7	48	0	0	0	0	0	0	6	1	17	0					8	1	2	7	0	36	7	27	5	1	12	8	11	32	53					0	0	10	0	1	18	10	2	20	20	20
0	0	12	0	1	20	0	0	8	2	0	36	9	0	23	14					34	0	22	3	0	0	0	33	0	38	20	0	31	26	31					0	0	17	6	8	38	13	17	6	16	9
26	0	19	0	21	3	0	0	10	0	0	21	40	0	6	4					0	0	16	6	0	46	0	24	32	81	43	18	58	8	23					8	1	19	66	0	0	39	0	4	8	46
0	0	5	0	1	31	0	0	0	0	0	16	86	0	3	0					71	0	13	8	17	57	27	42	19	17	46	0	22	34	12					0	0	4	3	37	2	9	4	3	18	9
14	11	51	0	14	0	0	0	0	1	0	32	16	0	36	0					22	0	12	12	48	0	8	47	99	51	6	56	15	8	48					37	9	0	0	0	13	7	0	6	40	21
0	30	0	0	19	3	1	0	0	0	0	15	45	0	7	3					10	0	26	13	28	20	6	16	0	10	12	22	49	1	23					0	0	38	3	0	13	13	0	0	63	0
0	25	0	0	0	16	0	0	0	10	0	19	33	0	2	0					2	0	8	10	1	7	0	35	0	0	23	44	2	4	34					0	0	8	4	0	13	8	0	5	60	12
32	40	0	0	4	0	0	0	0	40	0	4	16	3	9	8					6	0	0	10	0	1	0	3	0	2	82	0	21	10	1					0	0	15	1	0	11	27	0	1	4	12
2	9	0	0	44	91	1	9	0	2	0	15	34	10	32	1					19	6	5	9	22	12	13	82	5	104	3	14	50	0	55					0	0	4	1	0	17	15	0	11	43	38
0	52	3	0	52	4	3	1	33	2	0	0	65	0	34	6					0	0	0	9	20	41	4	3	0	1	57	10	4	0	17					0	2	101	24	0	13	32	1	11	1	45
0	7	0	0	6	4	3	0	109	22	0	4	93	0	5	0					2	17	8	8	0	0	0	59	0	1	38	15	35	0	0					0	6	31	10	0	0	17	24	11	5	0
10	18	0	0	88	17	3	0	57	7	0	0	14	53	11	0					7	0	2	16	0	0	0	6	0	3	5	49	62	1	57					0	0	8	43	0	0	12	7	1	19	1
28	0	17	86	3	38	26	0	0	3	43	10	7	11	36	12					44	0	9	27	0	26	7	9	0	17	44	18	16	0	18					0	18	4	23	0	32	11	4	11	1	8
0	0	4	1	20	9	26	82	0	0	80	5	0	1	15	15					35	3	3	8	0	30	13	9	0	5	10	22	5	36	56					6	19	9	7	1	21	16	7	15	6	7
0	0	0	65	27	2	14	0	0	1	30	0	0	0	38	0					11	13	1	5	9	9	23	4	20	4	0	0	6	52	3					15	0	4	2	3	7	9	31	19	32	11
0	0	0	0	19	0	0	0	0	0	0	0	0	1	0	38					0	0	11	16	0	3	0	23	1	14	0	19	5	24	10					5	7	47	25	0	27	8	8	49	10	3
1	0	0	0	24	0	10	0	12	0	0	0	0	0	0	14					9	0	4	15	0	19	2	22	59	5	0	0	6	24	6					0	0	3	17	13	10	17	8	10	8	7
0	0	0	0	16	2	3	0	0	0	0	0	0	0	0	4					2	39	0	28	0	8	6	15	1	14	0	2	9	30	11					0	27	10	5	5	3	18	5	11	12	8
0	0	0	0	85	0	0	0	0	14	0	0	0	0	0	1					19	16	0	14	0	17	0	8	0	10	0	3	15	39	0					3	0	50	10	2	18	28	37	30	12	9
7	0	0	0	0	0	23	0	0	1	0	0	0	0	0	1					16	30	2	19	0	15	22	12	0	0	0	0	5	0	0					30	0	31	3	1	9	61	17	33	3	6
0	0	0	0	21	0	7	0	75	1	0	0	0	0	0	40					3	28	2	20	0	7	0	48	24	13	0	0	10	41	0					7	6	37	20	0	4	7	8	10	18	5
0	0	0	0	19	0	0	0	108	11	0	0	0	0	0	0					32	7	0	4	0	7	5	7	0	7	0	0	6	0	0					34	22	22	17	4	13	33	12	11	10	0
8	12	0	0	4	0	0	0	1	0	0	0	0	0	0	4					8	0	0	9	0	14	24	0	0	0	0	0	4	16	0					0	0	2	21	0	36	8	9	15	22	0
0	9	0	0	16	0	0	0	2	0	0	0	0	27	0	1					0	1	0	8	0	0	8	0	0	0	0	0	4	10	0					0	9	7	27	0	37	33	3	37	7	0
0	8	0	0	8	0	0	0	0	0	0	0	0	58	0	2					2	4	0	27	0	4	0	0	0	0	35	0	9	18	0					0	11	27	13	5	17	10	20	17	1	4
0	0	0	0	22	0	0	0	2	0	0	0	0	0	0	0					20	0	3	2	0	9	0	4	0	0	93	0	3	7	0					0	17	31	14	1	4	14	0	16	24	3
0	0	0	0	31	2	0	0	0	0	0	15	0	71	0	3					27	38	0	6	0	0	0	1	0	0	1	0	0	13	0					0	0	8	7	0	4	27	0	1	17	22
3	0	0	0	2	6	0	0	2	0	0	6	0	1	12	1					0	1	0	20	0	0	0	0	0	0	0	0	7	0	0					0	5	19	13	0	2	1	0	71	4	0
0	22	0	0	0	0	0	0	0	0	0	0	0	25	7	1					6	2	2	6	0	6	0	0	0	0	3	0	2	0	0					0	15	0	0	7	3	0	2	23	16	0
10	7	0	0	22	3	0	0	3	0	0	3	0	9	0	0					37	3	0	8	0	0	0	1	0	0	0	0	0	0	0					2	0	4	2	35	18	0	0	16	1	1
0	27	0	0	3	0	0	0	0	0	0	0	0	0	15	3					10	0	0	4	0	0	0	3	0	0	0	0	0	0	0					0	0	47	20	1	6	0	0	0	60	5
0	10	0	0	6	0	0	0	0	0	0	2	0	0	0	23					48	0	0	4	0	1	0	10	0	0	0	0	0	0	0					0	16	38	6	4	8	0	24	6	14	1
0	57	0	0	9	0	0	1	2	1	0	0	0	28	0	0					4	44	0	5	0	3	0	2	0	0	0	0	0	1	0					0	5	0	1	2	2	0	71	24	1	5
0	8	0	0	0	0	0	0	4	0	0	0	0	25	0	0					0	0	2	12	0	0	0	0	0	0	0	0	0	0	0					0	0	16	27	69	10	0	0	44	4	1
26	48	0	1	0	0	0	0	0	0	0	0	0	35	2	0					0	53	1	6	0	0	0	0	0	15	0	0	0	11	0					0	10	0	5	23	9	0	0	5	3	11
0	47	0	25	0	0	9	0	0	12	0	0	0	94	0	0					77	17	3	7	0	7	0	2	0	0	0	0	0	0	0					60	0	0	25	1	14	0	48	5	2	5
35	47	12	15	0	37	1	0	21	2	58	0	109	7	23	11					99	1	21	5	0	13	10	27	41	25	14	3	21	4	13					0	0	50	29	2	19	0	59	33	35	109
11	0	17	6	0	30	0	0	4	0	8	3	46	11	12	1					11	4	5	6	0	3	0	29	0	10	0	45	60	0	80					0	0	3	2	4	2	0	8	5	24	3
21	0	0	0	2	36	0	3	4	2	4	0	69	17	35	1					34	0	1	6	20	9	0	16	15	4	5	6	43	0	61					0	14	2	9	0	29	0	59	10	14	9
24	0	0	0	0	16	1	0	0	0	0	0	0	20	20	5					19	41	8	9	0	13	6	35	53	18	43	14	23	0	41					0	6	38	21	65	31	0	20	34	33	0
3	0	0	1	0	20	17	18	33	15	0	0	0	17	7	0					26	2	20	8	43	4	10	8	0	1	14	2	14	7	37					2	0	16	0	19	5	0	3	6	26	21
64	0	0	6	0	14	0	9	40	15	0	1	0	22	13	0					34	0	0	7	27	45	2	2	0	20	16	1	7	45	25					16	32	11	0	2	4	0	13	19	40	1
0	0	0	7	0	45	12	0	0	42	0	0	0	13	9	2					10	21	9	11	9	44	1	19	16	9	19	9	15	13	0					14	0	37	34	37	22	0	7	8	94	34
2	0	0	16	0	6	22	0	0	4	0	0	0	9	11	1					30	3	2	6	14	54	0	12	0	4	21	0	33	11	1					60	6	30	0	21	17	0	17	12	1	0
3	3	4	0	0	34	6	0	70	1	0	0	0	3	23	6					48	16	4	9	56	15	0	17	19	7	46	0	6	55	0					0	0	44	0	52	29	0	9	50	59	7
19	0	1	0	1	18	2	0	0	17	0	0	0	21	23	0					52	49	7	7	48	9	4	2	8	1	0	3	36	44	0					16	11	11	0	1	22	0	0	4	81	15
0	0	0	0	0	10	0	0	0	0	0	0	0	6	18	0					49	6	5	6	101	16	62	4	41	40	47	6	36	1	0					14	11	7	0	8	13	0	39	3	44	50
0	0	7	2	0	2	0	0	0	25	0	0	0	1	20	3					20	5	6	6	10	0	5	23	11	39	10	16	72	19	0					7	0	59	0	17	16	0	11	24	42	2
0	0	0	1	0	0	0	5	5	20	0	0	0	0	5	9					36	0	6	8	34	10	49	24	6	1	47	0	11	2	0					2	5	1	21	18	32	0	1	31	43	5
12	0	15	5	0	2	0	2	0	0	0	0	0	0	30	0					45	3	9	3	28	29	14	5	1	24	30	8	7	18	0					18	0	3	4	12	27	0	0	17	75	14
47	0	3	6	3	56	20	0	4	5	6	0	0	0	6	2					26	14	22	7	85	53	1	19	3	61	43	87	23	37	12					7	0	4	18	3	17	0	0	14	6	9
0	0	16	0	23	3	6	0	13	0	0	0	0	0	49	2					17	5	3	4	36	15	0	4	1	12	17	8	81	13	8					17	13	11	0	18	14	0	3	41	9	8
58	0	4	0	4	0	0	0	0	1	0	0	0	0	6	3					17	10	20	8	12	0	0	5	0	10	32	2	19	25	5					0	0	4	44	10	47	0	0	31	67	3
0	0	8	0	23	0	0	0	0	31	22	0	0	7	12	1					32	15	3	5	13	62	0	0	0	1	31	6	2	10	5					25	0	19	2	27	10	0	0	21	13	7
1	0	13	0	0	1	0	0	0	57	0	0	0	0	2	5					0	0	0	0	3	14	0	4	0	12	29	0	76	0	12					0	12	38	0	20	49	0	0	1	54	9
28	0	74	0	2	3	0	0	16	0	2	0	0	24	4	17					0	1	7	6	10	0	0	14	0	0	0	1	3	1	1					50	0	80	0	4	20	0	20	7	34	4
0	0	29	11	0	0	1	0	3	0	8	0	0	39	1	0					0	12	2	3	22	2	0	7	44	0	11	17	0	13	2					0	0	3	0	0	24	0	0	60	32	7
0	0	0	83	4	0	34	0	23	16	0	0	0	8	6	2					0	30	10	7	6	29	0	14	0	0	13	1	12	0	6					20	5	6	18	12	24	0	45	1	52	15
4	0	0	63	3	1	7	0	21	22	0	0	0	0	26	5					7	1	3	4	0	5	23	18	1	16	25	45	47	0	9					19	0	21	13	25	8	0	6	9	0	1
1	0	0	19	1	2	1	2	0	9	0	3	14	0	13	6					19	5	5	3	0	3	3	17	4	11	19	15	16	1	23					16	0	15	8	26	16	0	23	68	19	1
5	7	27	2	130	2	8	65	5	9	33	17	10	30	17	3					25	11	25	5	12	23	41	6	15	22	14	38	20	4	37					21	0	9	35	30	20	0	5	27	5	9
0	11	0	0	11	18	3	0	0	2	5	0	7	5	8	8					14	7	5	6	0	12	7	16	18	5	0	0	35	0	21					48	0	110	18	0	18	0	23	7	11	48
0	0	0	0	0	5	7	0	3	0	0	0	0	0	8	5					17	8	9	2	0	7	21	3	43	6	0	0	33	0	4					3	0	15	4	16	5	0	81	63	15	7
0	0	0	0	0	4	1	0	0	0	0	75	0	0	14	2					13	11	14	18	0	14	0	14	22	4	0	0	17	0	0					17	0	84	7	25	24	0	37	12	16	4
0	0	0	0	0	0	1	4	17	0	0	0	0	0	0	10					40	12	4	5	0	25	8	7	46	1	0	7	6	1	0					10	0	23	16	8	26	0	13	6	22	45
6	0	0	0	0	4	0	0	1	0	0	6	0	0	2	15					8	9	5	7	0	8	6	8	47	10	0	8	9	2	0					26	0	3	12	66	23	0	3	22	5	3
20	0	0	0	3	0	0	0	0	0	0	0	0	0	0	2					26	12	22	6	0	9	60	5	3	18	0	0	7	44	0					5	0	13	8	13	6	0	8	10	10	1
1	0	0	0	0	0	0	0	1	0	0	0	0	0	0	0					22	1	13	10	0	13	17	3	0	2	0	0	2	1	0					6	0	16	20	14	15	0	15	113	1	2
26	0	0	0	32	0	0	0	0	0	0	0	0	0	0	0					0	3	8	24	0	0	0	7	0	0	0	0	11	0	0					7	0	0	8	27	8	0	0	6	2	0
0	0	0	0	0	0	0	0	0	0	0	0	0	0	1	3					10	0	2	8	0	0	8	0	0	0	0	0	15	0	0					13	0	15	5	0	10	0	0	3	1	0
0	0	0	0	15	2	0	0	1	0	0	0	0	0	0	0					0	5	4	3	0	0	10	0	0	0	0	0	0	0	0					5	0	51	5	23	3	0	0	29	20	0
0	0	0	0	40	0	0	0	3	1	0	0	1	0	0	0					4	1	3	7	0	0	0	0	0	5	0	0	28	10	0					5	0	9	4	20	11	0	0	5	4	0
0	0	0	0	87	0	0	0	2	1	0	4	14	0	0	0					11	1	5	5	0	0	0	0	0	0	0	0	81	0	0					3	0	21	11	66	4	0	6	2	4	0
0	0	0	0	14	0	0	0	0	4	0	0	0	1	0	23					3	20	0	3	0	0	0	0	0	0	0	0	3	1	0					11	0	4	9	2	41	0	51	47	0	10
0	0	0	0	8	0	0	0	0	2	0	0	22	1	0	17					2	1	40	2	0	7	0	0	0	0	0	0	6	0	0					0	0	2	10	4	51	0	0	29	1	29
0	0	0	0	0	0	0	12	2	11	0	0	1	1	0	0					0	4	0	6	0	0	0	0	0	0	0	0	11	34	0					0	0	3	2	14	10	0	0	18	1	0
0	0	0	0	16	0	0	0	0	26	0	0	0	0	0	3					0	0	0	5	0	5	0	0	0	0	0	0	0	2	0					0	0	1	3	12	6	0	0	2	2	5
0	3	0	0	4	2	0	0	0	2	0	0	0	0	0	0					0	2	7	2	0	1	0	0	0	0	0	0	0	0	0					0	0	15	55	29	39	0	0	2	5	0
0	0	0	0	0	0	0	15	0	0	0	0	0	0	0	8					11	0	1	6	0	16	0	0	0	0	0	0	23	0	0					0	0	4	10	0	16	0	0	12	3	0
0	5	9	0	0	0	0	0	2	5	0	0	0	0	19	1					0	0	0	10	0	0	0	0	0	5	0	0	18	16	0					0	0	1	21	57	3	0	0	3	1	0
0	0	0	0	0	0	0	1	5	0	0	0	0	0	36	6					0	0	0	5	0	0	0	0	0	4	0	0	0	0	0					0	0	9	11	0	13	0	0	51	0	8
0	0	0	0	0	0	0	0	0	0	0	0	17	0	4	0					0	0	0	3	0	0	0	0	0	0	0	0	0	5	0					0	0	28	8	0	26	0	0	13	0	1
0	0	0	0	0	0	0	0	0	0	23	0	32	0	0	0					0	0	3	4	0	0	0	4	0	0	0	0	0	46	0					0	0	3	44	18	4	0	24	21	0	14
0	0	0	0	3	0	0	0	0	3	0	8	1	0	0	0					0	2	0	0	0	0	0	0	0	0	0	0	0	6	0					0	0	1	18	41	28	0	9	3	5	2
[truncated: 4 more columns]

## Sheet: Figure 6F
Figure 6F Daily crossing activities
	DMSO
AmOctβ2R	3.61	1.87	2.51	3.3	2.08	3.13	4.47	3.27	3.94	4.19	3.83	0.49	4.91	1.06	3.37	3.81	3.49	3	4.35	6.28	2.25	1.84	2.57	5.89	0.37	3.49	3.17	0.37
AmOctβ2RV3X	3.95	2.15	3.93	3.74	4.3	1.58	2.13	3.17	3.45	3.43	5.82	4.11	2.46	4.47	3.26	3.7	2.52	3.28	1.6	2.25	5.96	2.74
VdOctβ2R	3.91	0.76	2.39	2.43	4.29	3.73	1.5	1.36	2.99	3.5	1.69	1.17	3.43	2.63	4.83	1.88	3.42	5.28	1.56	1.97	7.05	5.04	1.7	1	4.91	2.26	1.53	2.46	5.95	5.73	5.44	2.25
	100 uM Amitraz
AmOctβ2R	7.39	2.61	7.55	4.6	3.27	3.73	4.79	2.59	0.88	2.98	11.63	4.68	4.93	1.19	3.9	11.14	2.03	10.32	5.8	3.51	2.92	4.29	3.22	9.39	3.25	2.94	7.61	1.84	4.07
AmOctβ2RV3X	4.35	5.51	3.42	2.01	3.54	2.05	3.09	8.42	5.68	4.58	5.07	2.95	5.67	7.98	3.86	6.43	1.59	5.02	3.9	2.81	9.19	3.93	7.43	5.59	4	2.9	8.32	7.22
VdOctβ2R	8.37	3.98	3.54	3.48	2.96	5.89	5.87	3.68	4.58	4.08	5.46	3.48	9.88	4.91	4.03	7.39	3.61	2.96	4.6	2.81	5.44	4.3	10.14	4.87	5.96	8.73	5.19	6.48	5.87	7.76
	1 mM Amitraz
AmOctβ2R	3.42	3.6	4.24	5.28	4.92	2.76	2.56	5.9	2.05	4.19	2.54	6.71	5.05	3.43	3.14	5.17	4.31	5.47	6	7.46	5.41	4.1	8.97	1.32	4.33	1.53	7.97	4.94	4.79	1.31
AmOctβ2RV3X	4.21	10.12	2.25	6	2.95	10.1	9.67	7.44	6.54	7.3	6.34	1.57	3.92	8.22	4.35	4.29	4.78	4.39	7.44	2.83	5.56	7.51	10.18	4.96	5.65	7.98	6.01	7.32
VdOctβ2R	4.89	9.07	9.53	5.67	8.88	6.18	10.15	10.31	5.22	3.08	2.38	5.39	9.25	3.11	2.73	7.83	7.2	3.95	6.07	8.02	6.14	5.85	8.02	5.27	3.41	3.59	3
