# Supplementary figures and images for: An octopamine receptor confers selective toxicity of amitraz on honeybees and Varroa mites
Source: eLife journal article supplement (doi:10.7554/elife.68268), 2021-07-12

Figure 1—figure supplement 1

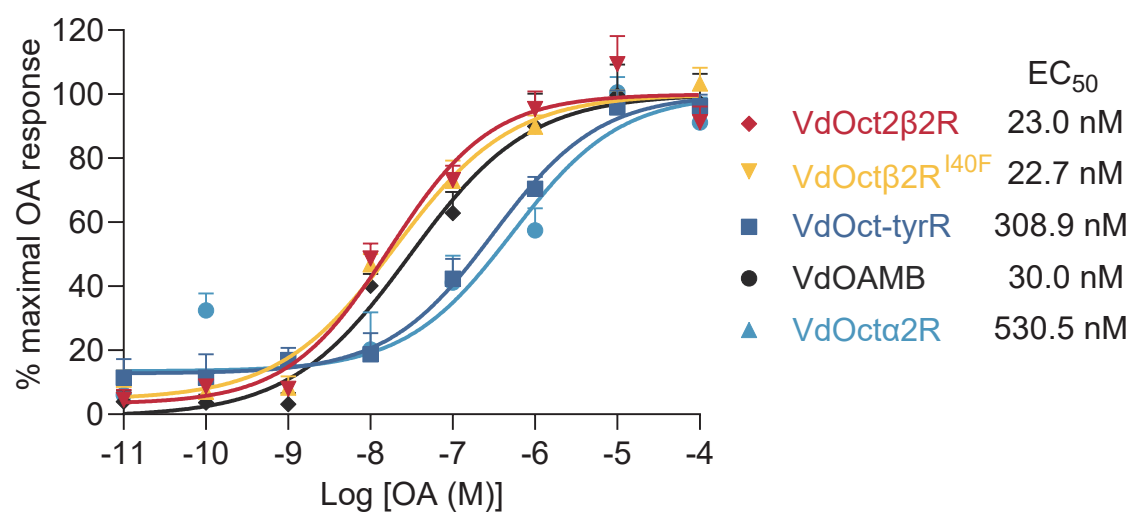

Supplement: supp [file elife-68268-supp-v1.zip › elife_poa_e68268_Figure_1_figure_supplement_1.pdf]

Figure 1—figure supplement 2

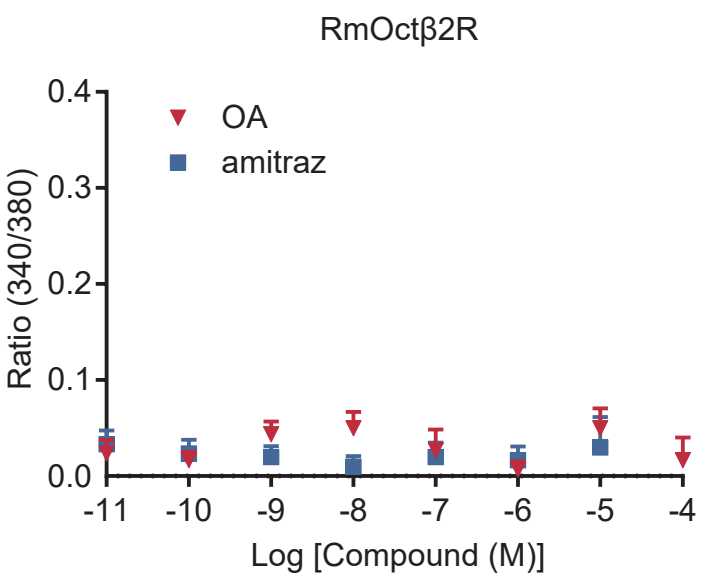

Supplement: supp [file elife-68268-supp-v1.zip › elife_poa_e68268_Figure_1_figure_supplement_2.pdf]

Figure 2—figure supplement 1

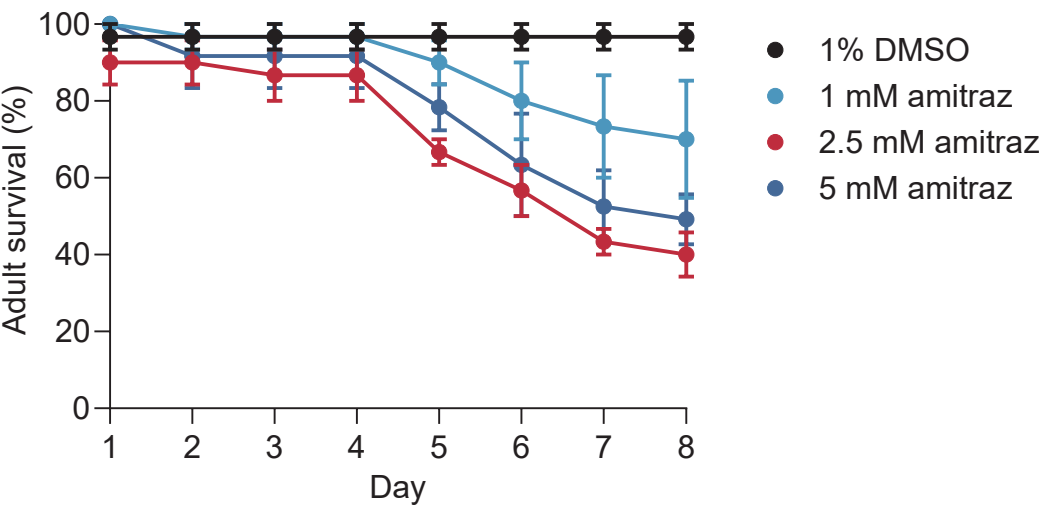

Supplement: supp [file elife-68268-supp-v1.zip › elife_poa_e68268_Figure_2_figure_supplement_1.pdf]

Figure 5—figure supplement 1

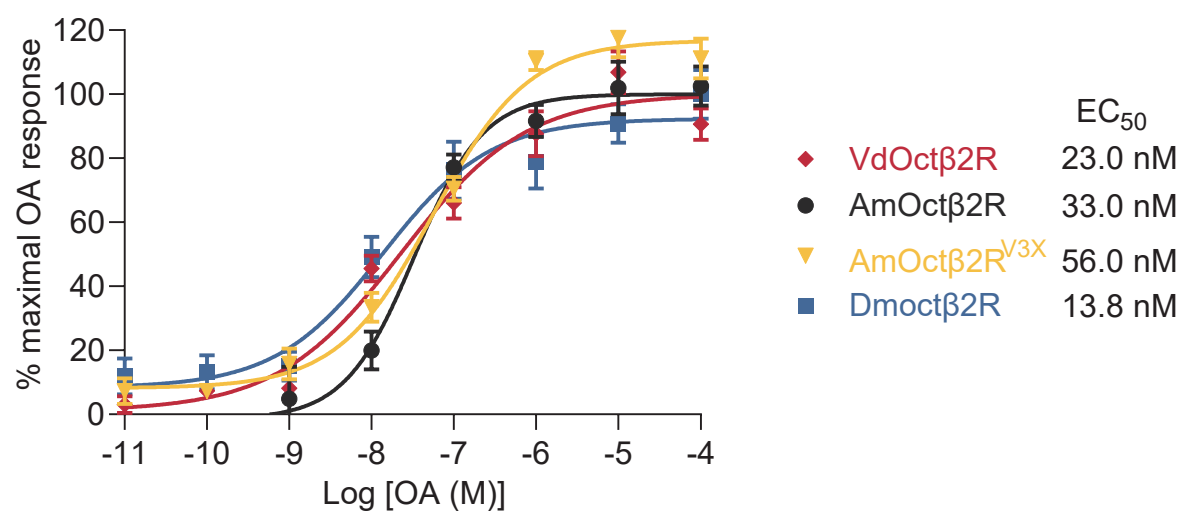

Supplement: supp [file elife-68268-supp-v1.zip › elife_poa_e68268_Figure_5_figure_supplement_1.pdf]

Figure 5—figure supplement 2

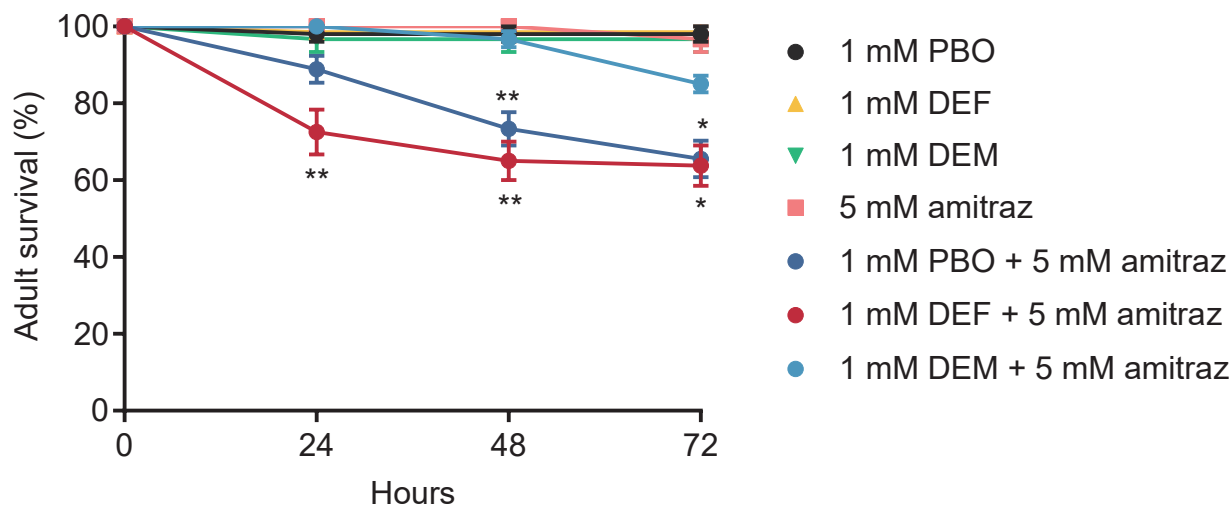

Supplement: supp [file elife-68268-supp-v1.zip › elife_poa_e68268_Figure_5_figure_supplement_2.pdf]

Figure 5—figure supplement 3

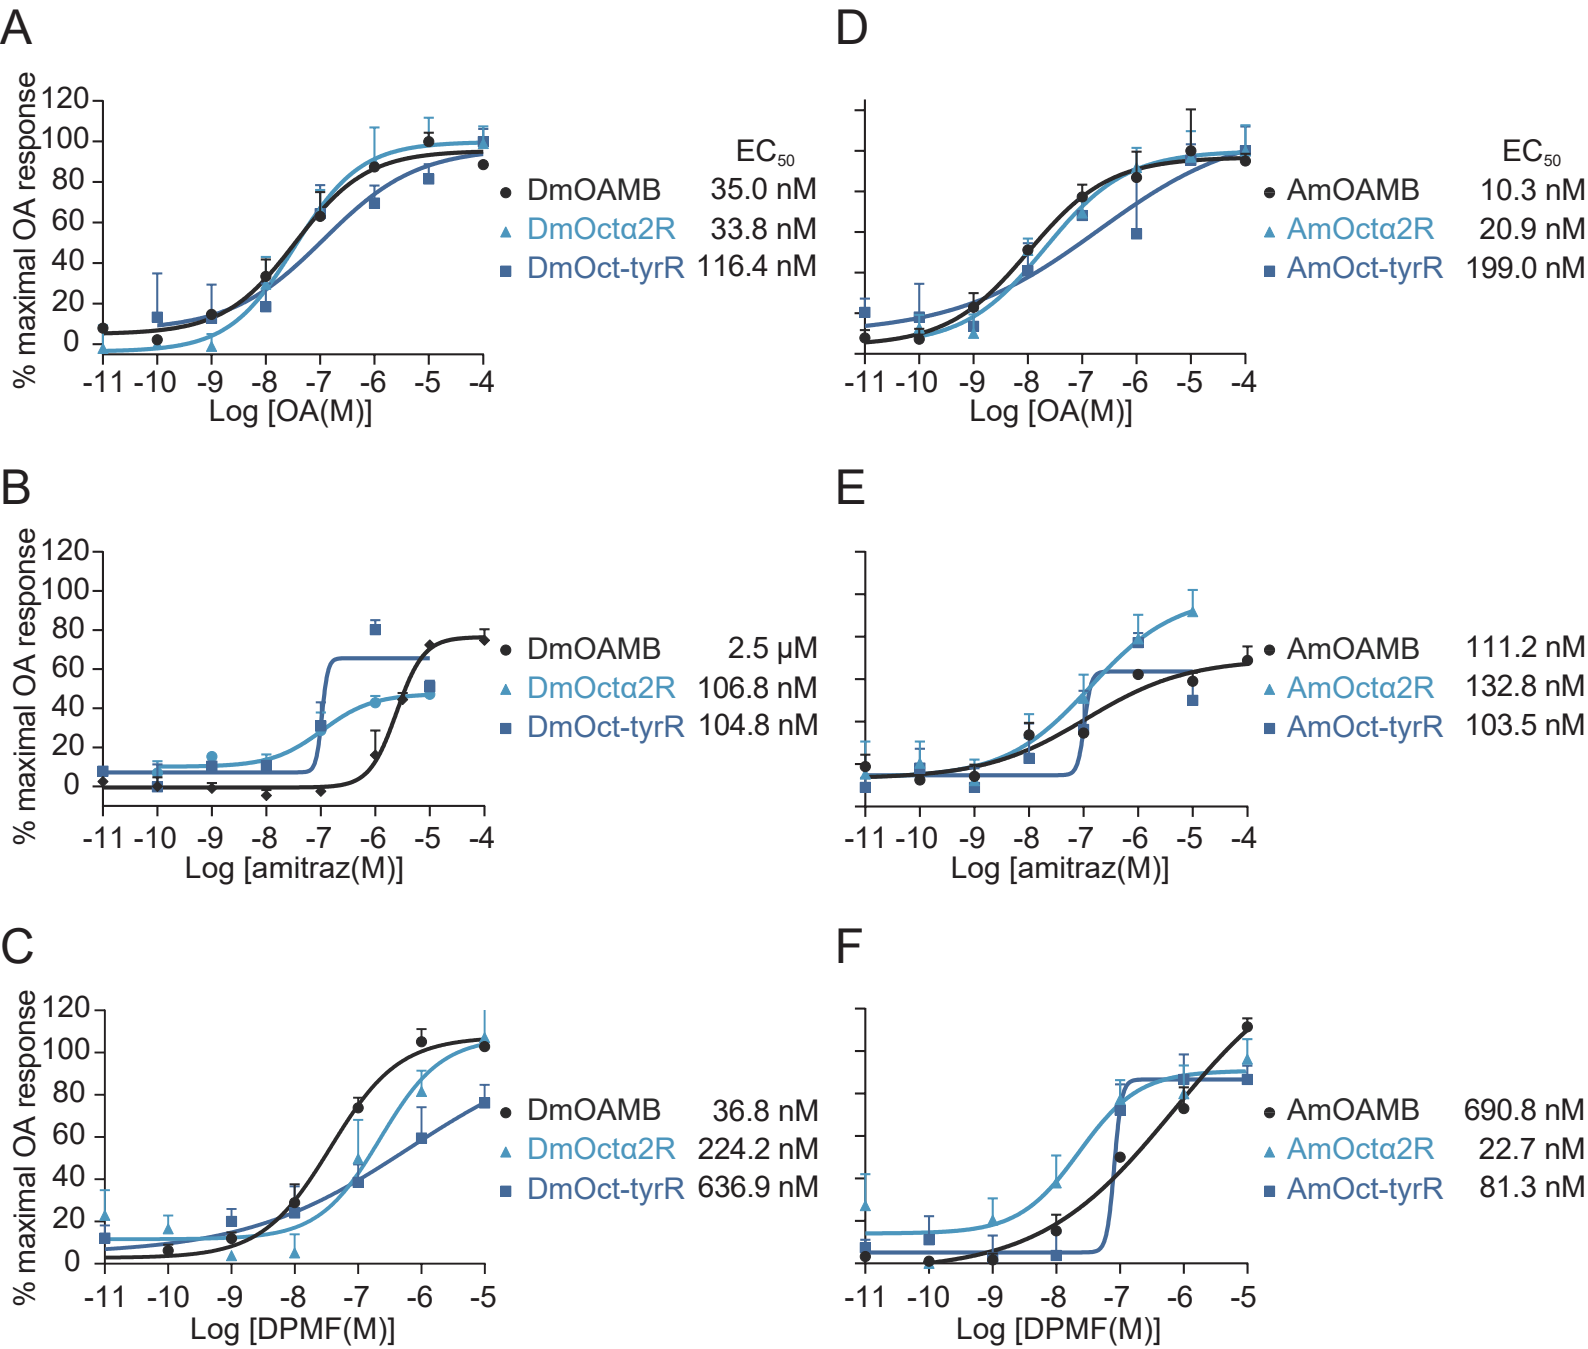

Supplement: supp [file elife-68268-supp-v1.zip › elife_poa_e68268_Figure_5_figure_supplement_3.pdf]

Figure 5—figure supplement 4

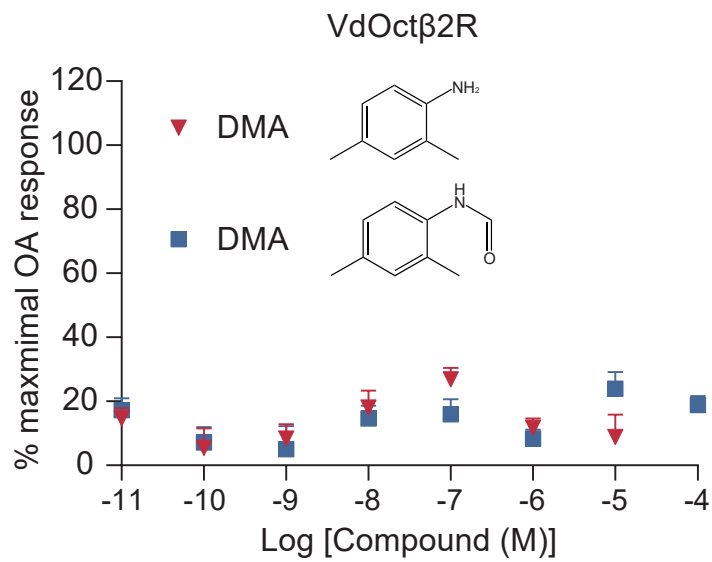

Supplement: supp [file elife-68268-supp-v1.zip › elife_poa_e68268_Figure_5_figure_supplement_4.pdf]
